# Supplementary material for: Tumor cell p38 inhibition to overcome immunotherapy resistance
Source: Research Square preprint supplement (doi:10.21203/rs.3.rs-3183496/v1), 2023-08-19
Supplement: Supplementary file 1 [file 59e54bdd42591b2da299ff28.xlsx]

## Sheet: Index
Supplementary Tables
Table S1	List of drugs targeting the 59 oncogenic pathways associated with immune exclusion in HPV-negative HNSCC identified in our study from The Drug Gene Interaction Database (DGIdb).
Table S2	59 pathways in HNSCC scRNAseq cohort A comparing low- vs high-T cell-infiltrated tumors.
Table S3	59 pathways in HNSCC scRNAseq cohort B comparing low- vs high-T cell-infiltrated tumors.
Table S4	Ensemble scores of 59 pathways from TCGA, ICGC and both HNSCC scRNAseq cohorts.
Table S5	IHC measures of CD8+, CTNNB1+, and phospho-p38+ cell density.
Table S6	Multispectral imaging measures of CD3+, CD8+, PanCK+, and phospho-p38+ cell density.
Table S7	Demographic and clinical characteristics of subjects on the clinical trial.
Table S8	Dose-limiting toxicities (DLTs) and associated high-grade adverse events (AEs) associated with each DLT event.
Table S9	Type of adverse events (AEs) and proportion of AEs.
Table S10	Pexmetinib plasma pharmacokinetic parameters (geometric mean (geometric standard deviation)).
Table S11	AR00451575 plasma pharmacokinetic parameters and AR00451575/pexmetinib metabolic ratios (geometric mean (geometric standard deviation)).

## Sheet: Table_S1
search_term	match_term	match_type	gene	drug	interaction_types	sources	pmids
FGF2	FGF2	Definite	FGF2	MUPARFOSTAT	inhibitor	ChemblInteractions
FGF2	FGF2	Definite	FGF2	FP-1039	suppressor	TALC
FGF2	FGF2	Definite	FGF2	SUCRALFATE	agonist|inducer	TTD	7948825|8578218|1957124|1970337|8578198
FGF2	FGF2	Definite	FGF2	SIROLIMUS	other/unknown	TdgClinicalTrial	12742462
FGF2	FGF2	Definite	FGF2	THALIDOMIDE		PharmGKB	28373444
FGF2	FGF2	Definite	FGF2	LENALIDOMIDE		PharmGKB	28373444
FGF2	FGF2	Definite	FGF2	FLUVOXAMINE		PharmGKB
FGF2	FGF2	Definite	FGF2	REBAMIPIDE		NCI	8774986
FGF2	FGF2	Definite	FGF2	SQUALAMINE		TTD
FGF2	FGF2	Definite	FGF2	INDOMETHACIN		NCI	9071932
FGF2	FGF2	Definite	FGF2	PYRAZOLE		NCI	9730230
FGF2	FGF2	Definite	FGF2	PHENYLEPHRINE		NCI	15875663
FGF2	FGF2	Definite	FGF2	CAFFEINE		NCI	15738284
FGF2	FGF2	Definite	FGF2	VINCRISTINE		NCI	8988045
FGF2	FGF2	Definite	FGF2	QUIZARTINIB		CIViC	27671675
FGF2	FGF2	Definite	FGF2	ASPIRIN		NCI	9071932
FGF2	FGF2	Definite	FGF2	ABT-510		NCI	16051960
FGF2	FGF2	Definite	FGF2	ATORVASTATIN		NCI	12147302
FGF2	FGF2	Definite	FGF2	THYROTROPIN		NCI	7519916
FGF2	FGF2	Definite	FGF2	TRIAMCINOLONE		NCI	15923512
FGF2	FGF2	Definite	FGF2	FAMOTIDINE		NCI	11943947
AHR	AHR	Definite	AHR	EMODIN	agonist	DTC	14644660
AHR	AHR	Definite	AHR	OMEPRAZOLE	agonist	PharmGKB	15860653|9139728
AHR	AHR	Definite	AHR	NAPHTHOQUINONE		DTC
AHR	AHR	Definite	AHR	DIMETHYL YELLOW		DTC
AHR	AHR	Definite	AHR	CHEMBL329673		DTC
AHR	AHR	Definite	AHR	DESMEDIPHAM		DTC
AHR	AHR	Definite	AHR	CHEMBL538965		DTC
AHR	AHR	Definite	AHR	CHRYSIN		DTC
AHR	AHR	Definite	AHR	DIPHENYLUREA		DTC
AHR	AHR	Definite	AHR	MICHLER'S KETONE		DTC
AHR	AHR	Definite	AHR	ALDICARB		DTC
AHR	AHR	Definite	AHR	NICLOSAMIDE		DTC
AHR	AHR	Definite	AHR	COLFORSIN		DTC
AHR	AHR	Definite	AHR	CHEMBL1873684		DTC
AHR	AHR	Definite	AHR	PHENAZOPYRIDINE HYDROCHLORIDE		DTC
AHR	AHR	Definite	AHR	YANGONIN		DTC
AHR	AHR	Definite	AHR	CHEMBL70582		DTC
AHR	AHR	Definite	AHR	DESMETHOXYYANGONIN		DTC
AHR	AHR	Definite	AHR	DIFLUBENZURON		DTC
AHR	AHR	Definite	AHR	GENISTEIN		DTC
AHR	AHR	Definite	AHR	SALICYLANILIDE		DTC
AHR	AHR	Definite	AHR	BENZOFURAN		DTC
AHR	AHR	Definite	AHR	FLAVONE		DTC
AHR	AHR	Definite	AHR	DIBENZ[A,H]ANTHRACENE		DTC
AHR	AHR	Definite	AHR	1-NAPHTHYLISOTHIOCYANATE		DTC
AHR	AHR	Definite	AHR	CHEMBL541230		DTC
AHR	AHR	Definite	AHR	PIPERINE		DTC
AHR	AHR	Definite	AHR	CHEMBL84685		DTC
AHR	AHR	Definite	AHR	NITAZOXANIDE		DTC
AHR	AHR	Definite	AHR	DICHLON		DTC
AHR	AHR	Definite	AHR	BETA-NAPHTHOFLAVONE		DTC	26222195|10620335|14684315|1658599
AHR	AHR	Definite	AHR	RESVERATROL		DTC	15634023
AHR	AHR	Definite	AHR	CHEMBL375270		DTC
AHR	AHR	Definite	AHR	CARBARIL		DTC
AHR	AHR	Definite	AHR	2,3,7,8-TETRACHLORODIBENZO-P-DIOXIN		DTC	14684315
AHR	AHR	Definite	AHR	CHEMBL57394		DTC
AHR	AHR	Definite	AHR	QUINALPHOS		DTC
AHR	AHR	Definite	AHR	CHRYSENE		DTC
AHR	AHR	Definite	AHR	3-METHYLCHOLANTHRENE		DTC
AHR	AHR	Definite	AHR	BENZO[B]FLUORANTHENE		DTC
AHR	AHR	Definite	AHR	METHYLCELLULOSE		NCI	11516172
AHR	AHR	Definite	AHR	LINURON		DTC
AHR	AHR	Definite	AHR	CHEMBL295337		DTC
AHR	AHR	Definite	AHR	CLIOQUINOL		DTC
AHR	AHR	Definite	AHR	METHABENZTHIAZURON		DTC
AHR	AHR	Definite	AHR	PYRAFLUFEN-ETHYL		DTC
AHR	AHR	Definite	AHR	RIMSULFURON		DTC
AHR	AHR	Definite	AHR	THIABENDAZOLE		DTC
AHR	AHR	Definite	AHR	CHEMBL26138		DTC
AHR	AHR	Definite	AHR	PENTACHLOROPHENOL		DTC
AHR	AHR	Definite	AHR	QUESTIOMYCIN B		DTC
AHR	AHR	Definite	AHR	CHEMBL597452		DTC
AHR	AHR	Definite	AHR	ROMIPLOSTIM		TTD	22970246
AHR	AHR	Definite	AHR	CHEMBL77675		DTC
AHR	AHR	Definite	AHR	BENZO[DEF]CHRYSENE		DTC	14684315
AHR	AHR	Definite	AHR	LEVOTHYROXINE		DTC
AHR	AHR	Definite	AHR	OLANZAPINE		PharmGKB	23492908
AHR	AHR	Definite	AHR	BENZO(K)FLUORANTHENE		DTC
AHR	AHR	Definite	AHR	CYPRODINIL		DTC
MEK	MAP2K7	Ambiguous	MAP2K7	SELUMETINIB	inhibitor	MyCancerGenomeClinicalTrial
MEK	MAP2K7	Ambiguous	MAP2K7	COBIMETINIB	allosteric modulator|inhibitor	MyCancerGenome|MyCancerGenomeClinicalTrial
MEK	MAP2K7	Ambiguous	MAP2K7	TRAMETINIB	inhibitor	MyCancerGenomeClinicalTrial
MEK	MAP2K7	Ambiguous	MAP2K7	BINIMETINIB	inhibitor	MyCancerGenomeClinicalTrial|TTD
MEK	MAP2K7	Ambiguous	MAP2K7	RG-7420		TTD
MEK	MAP2K7	Ambiguous	MAP2K7	WX-554		TdgClinicalTrial
MEK	MAP2K2	Ambiguous	MAP2K2	CHEMBL546797		DTC
MEK	MAP2K2	Ambiguous	MAP2K2	VANDETANIB		DTC
MEK	MAP2K2	Ambiguous	MAP2K2	SELUMETINIB	inhibitor	TALC|MyCancerGenome|ClearityFoundationClinicalTrial|ChemblInteractions|MyCancerGenomeClinicalTrial|TTD	17332304|28029918|17699718
MEK	MAP2K2	Ambiguous	MAP2K2	CEDIRANIB		DTC
MEK	MAP2K2	Ambiguous	MAP2K2	TRAMETINIB DIMETHYL SULFOXIDE	inhibitor	ChemblInteractions
MEK	MAP2K2	Ambiguous	MAP2K2	VEMURAFENIB		CIViC	24265153
MEK	MAP2K2	Ambiguous	MAP2K2	ARRY-300		TdgClinicalTrial
MEK	MAP2K2	Ambiguous	MAP2K2	AS-703988	inhibitor	ChemblInteractions
MEK	MAP2K2	Ambiguous	MAP2K2	BALAMAPIMOD	inhibitor	ChemblInteractions
MEK	MAP2K2	Ambiguous	MAP2K2	CHEMBL406845		DTC
MEK	MAP2K2	Ambiguous	MAP2K2	RG-7167	inhibitor	ChemblInteractions
MEK	MAP2K2	Ambiguous	MAP2K2	COBIMETINIB	allosteric modulator|inhibitor	MyCancerGenome|ClearityFoundationClinicalTrial|ChemblInteractions|MyCancerGenomeClinicalTrial|OncoKB
MEK	MAP2K2	Ambiguous	MAP2K2	TRAMETINIB	antagonist|inhibitor	TALC|MyCancerGenome|ClearityFoundationClinicalTrial|CIViC|MyCancerGenomeClinicalTrial	25452114|23432625
MEK	MAP2K2	Ambiguous	MAP2K2	ILORASERTIB		DTC
MEK	MAP2K2	Ambiguous	MAP2K2	RG-1530		DTC
MEK	MAP2K2	Ambiguous	MAP2K2	BINIMETINIB	allosteric modulator|inhibitor	MyCancerGenome|TdgClinicalTrial|ClearityFoundationClinicalTrial|ChemblInteractions|MyCancerGenomeClinicalTrial	28587477
MEK	MAP2K2	Ambiguous	MAP2K2	CHEMBL1956073		DTC	20053779
MEK	MAP2K2	Ambiguous	MAP2K2	COBIMETINIB FUMARATE	inhibitor	ChemblInteractions
MEK	MAP2K2	Ambiguous	MAP2K2	PF-00562271		DTC
MEK	MAP2K2	Ambiguous	MAP2K2	REFAMETINIB	allosteric modulator|inhibitor	MyCancerGenome|ChemblInteractions
MEK	MAP2K2	Ambiguous	MAP2K2	TAK-733	inhibitor	MyCancerGenome|ClearityFoundationClinicalTrial|ChemblInteractions
MEK	MAP2K2	Ambiguous	MAP2K2	RG-7420	inhibitor	MyCancerGenome
MEK	MAP2K2	Ambiguous	MAP2K2	CENISERTIB		DTC
MEK	MAP2K2	Ambiguous	MAP2K2	RO-4987655	inhibitor	ChemblInteractions
MEK	MAP2K2	Ambiguous	MAP2K2	WX-554	inhibitor	TdgClinicalTrial|ChemblInteractions
MEK	MAP2K2	Ambiguous	MAP2K2	PIMASERTIB	inhibitor	TALC|MyCancerGenome|ClearityFoundationClinicalTrial|ChemblInteractions
MEK	MAP2K2	Ambiguous	MAP2K2	CI-1040	inhibitor	MyCancerGenome|ChemblInteractions
MEK	MAP2K2	Ambiguous	MAP2K2	TOZASERTIB		DTC
MEK	MAP2K2	Ambiguous	MAP2K2	CHEMBL202721		DTC
MEK	MAP2K2	Ambiguous	MAP2K2	TAE-684		DTC
MEK	MAP2K2	Ambiguous	MAP2K2	PD-0166285		DTC
MEK	MAP2K2	Ambiguous	MAP2K2	AZD-8330	inhibitor	ChemblInteractions
MEK	MAP2K2	Ambiguous	MAP2K2	CHEMBL379975		DTC
MEK	MAP2K2	Ambiguous	MAP2K2	JNJ-7706621		DTC
MEK	MAP2K2	Ambiguous	MAP2K2	RG-7304	inhibitor	ChemblInteractions
MEK	MAP2K2	Ambiguous	MAP2K2	DABRAFENIB		CIViC	24265153|25452114
MEK	MAP2K2	Ambiguous	MAP2K2	PD-0325901	inhibitor	DTC|MyCancerGenome|ChemblInteractions	23398453
MEK	MAP2K2	Ambiguous	MAP2K2	DASATINIB		DTC
MEK	MAP2K2	Ambiguous	MAP2K2	DOVITINIB		DTC
MEK	MAP2K2	Ambiguous	MAP2K2	LINIFANIB		DTC
MEK	MAP2K1	Ambiguous	MAP2K1	CHEMBL546797		DTC
MEK	MAP2K1	Ambiguous	MAP2K1	VANDETANIB		DTC
MEK	MAP2K1	Ambiguous	MAP2K1	PANITUMUMAB		JAX-CKB|CIViC	26644315|31227518
MEK	MAP2K1	Ambiguous	MAP2K1	OMIPALISIB		JAX-CKB	22389471
MEK	MAP2K1	Ambiguous	MAP2K1	SELUMETINIB	allosteric modulator|inhibitor	TALC|MyCancerGenome|ClearityFoundationClinicalTrial|JAX-CKB|ChemblInteractions|COSMIC|CIViC|CancerCommons|MyCancerGenomeClinicalTrial|TTD	22197931|26324360|17332304|22327936|25394791|28029918|18632602|19915144|26582713|17699718|23444215|24448821|27312529
MEK	MAP2K1	Ambiguous	MAP2K1	TRAMETINIB DIMETHYL SULFOXIDE	inhibitor	ChemblInteractions
MEK	MAP2K1	Ambiguous	MAP2K1	VEMURAFENIB		JAX-CKB|DoCM|CIViC	22197931|24265153|21383288|7651428|18632602|19915144|23569304|22389471|25157968|24448821|27312529
MEK	MAP2K1	Ambiguous	MAP2K1	ARRY-300		TdgClinicalTrial
MEK	MAP2K1	Ambiguous	MAP2K1	AS-703988	inhibitor	ChemblInteractions
MEK	MAP2K1	Ambiguous	MAP2K1	BALAMAPIMOD	inhibitor	ChemblInteractions
MEK	MAP2K1	Ambiguous	MAP2K1	CHEMBL406845		DTC
MEK	MAP2K1	Ambiguous	MAP2K1	RG-7167	inhibitor	ChemblInteractions
MEK	MAP2K1	Ambiguous	MAP2K1	COBIMETINIB	allosteric modulator|inhibitor	TALC|MyCancerGenome|TdgClinicalTrial|ClearityFoundationClinicalTrial|JAX-CKB|ChemblInteractions|CancerCommons|MyCancerGenomeClinicalTrial|OncoKB	26566875|26384788
MEK	MAP2K1	Ambiguous	MAP2K1	TRAMETINIB	antagonist|inhibitor	TALC|MyCancerGenome|TdgClinicalTrial|ClearityFoundationClinicalTrial|JAX-CKB|CIViC|MyCancerGenomeClinicalTrial|OncoKB	25370473|26644315|24265153|25673644|26566875|26582713|22389471|25899310|27312529|24982505|28179366|23432625|24265154
MEK	MAP2K1	Ambiguous	MAP2K1	CETUXIMAB		JAX-CKB|CIViC	26644315|27312529|28179366
MEK	MAP2K1	Ambiguous	MAP2K1	ILORASERTIB		DTC
MEK	MAP2K1	Ambiguous	MAP2K1	RG-1530		DTC
MEK	MAP2K1	Ambiguous	MAP2K1	BINIMETINIB	allosteric modulator|inhibitor	MyCancerGenome|TdgClinicalTrial|ClearityFoundationClinicalTrial|ChemblInteractions|CIViC|MyCancerGenomeClinicalTrial	31227518
MEK	MAP2K1	Ambiguous	MAP2K1	CHEMBL1956073		DTC	20053779
MEK	MAP2K1	Ambiguous	MAP2K1	COBIMETINIB FUMARATE	inhibitor	ChemblInteractions
MEK	MAP2K1	Ambiguous	MAP2K1	REFAMETINIB	allosteric modulator|inhibitor	MyCancerGenome|JAX-CKB|ChemblInteractions|CancerCommons	26582713
MEK	MAP2K1	Ambiguous	MAP2K1	PIMASERTIB HYDROCHLORIDE	inhibitor	CancerCommons
MEK	MAP2K1	Ambiguous	MAP2K1	ALPELISIB		JAX-CKB	27312529
MEK	MAP2K1	Ambiguous	MAP2K1	TAK-733	allosteric modulator|inhibitor	MyCancerGenome|ClearityFoundationClinicalTrial|ChemblInteractions|CancerCommons
MEK	MAP2K1	Ambiguous	MAP2K1	RG-7420	inhibitor	MyCancerGenome|ChemblInteractions
MEK	MAP2K1	Ambiguous	MAP2K1	CENISERTIB		DTC
MEK	MAP2K1	Ambiguous	MAP2K1	RO-4987655	inhibitor	ChemblInteractions|CancerCommons
MEK	MAP2K1	Ambiguous	MAP2K1	WX-554	inhibitor	TdgClinicalTrial|ChemblInteractions
MEK	MAP2K1	Ambiguous	MAP2K1	CERITINIB		JAX-CKB	25394791
MEK	MAP2K1	Ambiguous	MAP2K1	PIMASERTIB	inhibitor	TALC|MyCancerGenome|ClearityFoundationClinicalTrial|ChemblInteractions
MEK	MAP2K1	Ambiguous	MAP2K1	CI-1040	allosteric modulator|inhibitor	MyCancerGenome|JAX-CKB|ChemblInteractions	12370306|19915144
MEK	MAP2K1	Ambiguous	MAP2K1	TOZASERTIB		DTC
MEK	MAP2K1	Ambiguous	MAP2K1	CHEMBL202721		DTC
MEK	MAP2K1	Ambiguous	MAP2K1	TAE-684		DTC
MEK	MAP2K1	Ambiguous	MAP2K1	MEKINIST	inhibitor	CancerCommons
MEK	MAP2K1	Ambiguous	MAP2K1	PD-0166285		DTC
MEK	MAP2K1	Ambiguous	MAP2K1	E-6201	inhibitor	JAX-CKB|ChemblInteractions	24448821
MEK	MAP2K1	Ambiguous	MAP2K1	AZD-8330	inhibitor	TdgClinicalTrial|ChemblInteractions
MEK	MAP2K1	Ambiguous	MAP2K1	PLX-4720		JAX-CKB	21383288|19915144
MEK	MAP2K1	Ambiguous	MAP2K1	STAUROSPORINE		DTC
MEK	MAP2K1	Ambiguous	MAP2K1	CHEMBL379975		DTC
MEK	MAP2K1	Ambiguous	MAP2K1	SOTRASTAURIN		DTC
MEK	MAP2K1	Ambiguous	MAP2K1	JNJ-7706621		DTC
MEK	MAP2K1	Ambiguous	MAP2K1	RG-7304	inhibitor	DTC|ChemblInteractions	25766633
MEK	MAP2K1	Ambiguous	MAP2K1	DABRAFENIB		JAX-CKB|CIViC	25370473|24265153|25673644|22389471|27312529|24463458|24265154
MEK	MAP2K1	Ambiguous	MAP2K1	ENCORAFENIB		JAX-CKB	27312529
MEK	MAP2K1	Ambiguous	MAP2K1	PD-0325901	inhibitor	DTC|MyCancerGenome|JAX-CKB|ChemblInteractions	23398453|26267534|25766633|26582713|10592235
MEK	MAP2K1	Ambiguous	MAP2K1	DASATINIB		DTC
MEK	MAP2K1	Ambiguous	MAP2K1	DOVITINIB		DTC
MEK	MAP2K1	Ambiguous	MAP2K1	DEL-22379		JAX-CKB	26267534
EGR1	EGR1	Definite	EGR1	GENIPIN		DTC	26283511
ERK	EPHB2	Ambiguous	EPHB2	VANDETANIB	inhibitor	ChemblInteractions
ERK	EPHB2	Ambiguous	EPHB2	MK-8353		TTD
ERK	EPHB2	Ambiguous	EPHB2	ULIXERTINIB		TTD
ERK	MAPK1	Ambiguous	MAPK1	ELLAGIC ACID		DTC
ERK	MAPK1	Ambiguous	MAPK1	PD-169316		DTC
ERK	MAPK1	Ambiguous	MAPK1	CANTHARIDIN		DTC
ERK	MAPK1	Ambiguous	MAPK1	CHEMBL2088731		DTC	22982122
ERK	MAPK1	Ambiguous	MAPK1	SB-202190		DTC
ERK	MAPK1	Ambiguous	MAPK1	SANGUINARIUM		DTC
ERK	MAPK1	Ambiguous	MAPK1	PHENMEDIPHAM		DTC
ERK	MAPK1	Ambiguous	MAPK1	IROFULVEN		NCI	12014623
ERK	MAPK1	Ambiguous	MAPK1	NIFEDIPINE		DTC
ERK	MAPK1	Ambiguous	MAPK1	PHENYLMERCURIC ACETATE		DTC
ERK	MAPK1	Ambiguous	MAPK1	SP-600125		DTC
ERK	MAPK1	Ambiguous	MAPK1	CHEMBL210618		DTC
ERK	MAPK1	Ambiguous	MAPK1	ARISTOLACTONE		DTC
ERK	MAPK1	Ambiguous	MAPK1	GR-127935		DTC
ERK	MAPK1	Ambiguous	MAPK1	DOXORUBICIN HYDROCHLORIDE		DTC
ERK	MAPK1	Ambiguous	MAPK1	GENTIAN VIOLET		DTC
ERK	MAPK1	Ambiguous	MAPK1	PROGESTERONE		DTC
ERK	MAPK1	Ambiguous	MAPK1	PURPURIN		DTC
ERK	MAPK1	Ambiguous	MAPK1	CAPTAN		DTC
ERK	MAPK1	Ambiguous	MAPK1	CHEMBL329785		DTC	22982122
ERK	MAPK1	Ambiguous	MAPK1	O-DEMETHYLATED ADAPALENE		DTC
ERK	MAPK1	Ambiguous	MAPK1	CHIR-99021	inhibitor	TTD
ERK	MAPK1	Ambiguous	MAPK1	CHELERYTHRINE CHLORIDE		DTC
ERK	MAPK1	Ambiguous	MAPK1	NECA		DTC
ERK	MAPK1	Ambiguous	MAPK1	ALPHA-NAPHTHOFLAVONE		DTC
ERK	MAPK1	Ambiguous	MAPK1	CHEMBL547833		DTC
ERK	MAPK1	Ambiguous	MAPK1	CHEMBL84010		DTC
ERK	MAPK1	Ambiguous	MAPK1	CHEMBL578944		DTC
ERK	MAPK1	Ambiguous	MAPK1	CHEMBL1224755		DTC
ERK	MAPK1	Ambiguous	MAPK1	CHEMBL429095		DTC
ERK	MAPK1	Ambiguous	MAPK1	MERCURIC CHLORIDE		DTC
ERK	MAPK1	Ambiguous	MAPK1	RG-1530		DTC
ERK	MAPK1	Ambiguous	MAPK1	PATULIN		DTC
ERK	MAPK1	Ambiguous	MAPK1	CLIOQUINOL		DTC
ERK	MAPK1	Ambiguous	MAPK1	MADOLIN U		DTC
ERK	MAPK1	Ambiguous	MAPK1	QUINALIZARIN		DTC
ERK	MAPK1	Ambiguous	MAPK1	CHEMBL225519		DTC
ERK	MAPK1	Ambiguous	MAPK1	CHEMBL2063681		DTC	22283430
ERK	MAPK1	Ambiguous	MAPK1	SANGUINARIUM CHLORIDE		DTC
ERK	MAPK1	Ambiguous	MAPK1	PF-00562271		DTC
ERK	MAPK1	Ambiguous	MAPK1	CHEMBL2333543		DTC
ERK	MAPK1	Ambiguous	MAPK1	CHEMBL1493528		DTC
ERK	MAPK1	Ambiguous	MAPK1	ACID BLUE 129		DTC
ERK	MAPK1	Ambiguous	MAPK1	U-0126		DTC
ERK	MAPK1	Ambiguous	MAPK1	DERRUBONE		DTC
ERK	MAPK1	Ambiguous	MAPK1	ZIRAM		DTC
ERK	MAPK1	Ambiguous	MAPK1	BENZALKONIUM CHLORIDE		DTC
ERK	MAPK1	Ambiguous	MAPK1	CHEMBL2063687		DTC	22283430
ERK	MAPK1	Ambiguous	MAPK1	MUNDULONE		DTC
ERK	MAPK1	Ambiguous	MAPK1	BIOCHANIN		DTC
ERK	MAPK1	Ambiguous	MAPK1	GAMBOGIC AMIDE		DTC	17911251
ERK	MAPK1	Ambiguous	MAPK1	SB-220025		DTC	10592235
ERK	MAPK1	Ambiguous	MAPK1	GO-6976		DTC
ERK	MAPK1	Ambiguous	MAPK1	CHEMBL184074		DTC
ERK	MAPK1	Ambiguous	MAPK1	CHEMBL1519374		DTC
ERK	MAPK1	Ambiguous	MAPK1	CHEMBL580183		DTC
ERK	MAPK1	Ambiguous	MAPK1	IPRIFLAVONE		DTC
ERK	MAPK1	Ambiguous	MAPK1	MADOLIN A		DTC
ERK	MAPK1	Ambiguous	MAPK1	REBAMIPIDE		NCI	17171453
ERK	MAPK1	Ambiguous	MAPK1	CHEMBL531322		DTC
ERK	MAPK1	Ambiguous	MAPK1	XANTHOHUMOL		DTC	22111577
ERK	MAPK1	Ambiguous	MAPK1	CHEMBL421215		DTC
ERK	MAPK1	Ambiguous	MAPK1	SB-203580		DTC
ERK	MAPK1	Ambiguous	MAPK1	VOLVALERENAL D		DTC
ERK	MAPK1	Ambiguous	MAPK1	CI-1040		TTD
ERK	MAPK1	Ambiguous	MAPK1	ZALCITABINE		DTC
ERK	MAPK1	Ambiguous	MAPK1	LORATADINE		DTC
ERK	MAPK1	Ambiguous	MAPK1	CHEMBL428789		DTC
ERK	MAPK1	Ambiguous	MAPK1	CHEMBL2095095		DTC
ERK	MAPK1	Ambiguous	MAPK1	INDIRUBIN-3-MONOXIME		DTC
ERK	MAPK1	Ambiguous	MAPK1	TREQUINSIN HYDROCHLORIDE		DTC
ERK	MAPK1	Ambiguous	MAPK1	MUNDULONE ACETATE		DTC
ERK	MAPK1	Ambiguous	MAPK1	TYRPHOSTIN 47		DTC
ERK	MAPK1	Ambiguous	MAPK1	CHEMBL2333548		DTC
ERK	MAPK1	Ambiguous	MAPK1	CHLORANIL		DTC
ERK	MAPK1	Ambiguous	MAPK1	WEDELOLACTONE		DTC	22926226
ERK	MAPK1	Ambiguous	MAPK1	CHEMBL532849		DTC
ERK	MAPK1	Ambiguous	MAPK1	SPINASAPONIN A METHYL ESTER		DTC	20951582
ERK	MAPK1	Ambiguous	MAPK1	CHEMBL285819		DTC
ERK	MAPK1	Ambiguous	MAPK1	CHEMBL261237		DTC
ERK	MAPK1	Ambiguous	MAPK1	CHEMBL1270169		DTC
ERK	MAPK1	Ambiguous	MAPK1	WITHAFERIN A		DTC	20726569
ERK	MAPK1	Ambiguous	MAPK1	CHEMBL581574		DTC
ERK	MAPK1	Ambiguous	MAPK1	TAE-684		DTC
ERK	MAPK1	Ambiguous	MAPK1	PHENETHYLISOTHIOCYANATE		DTC	22607231
ERK	MAPK1	Ambiguous	MAPK1	CHLOROTHALONIL		DTC
ERK	MAPK1	Ambiguous	MAPK1	DIHYDROGAMBOGIC ACID		DTC
ERK	MAPK1	Ambiguous	MAPK1	NAFTOPIDIL		DTC
ERK	MAPK1	Ambiguous	MAPK1	ERLOTINIB		CIViC	26181029
ERK	MAPK1	Ambiguous	MAPK1	DIPHENHYDRAMINE HYDROCHLORIDE		DTC
ERK	MAPK1	Ambiguous	MAPK1	GF-109203		DTC
ERK	MAPK1	Ambiguous	MAPK1	CHEMBL581872		DTC
ERK	MAPK1	Ambiguous	MAPK1	CHEMBL585628		DTC
ERK	MAPK1	Ambiguous	MAPK1	ISOVELLERAL		DTC
ERK	MAPK1	Ambiguous	MAPK1	CIMIRACEMATE A		DTC	19835377
ERK	MAPK1	Ambiguous	MAPK1	R-1487		DTC
ERK	MAPK1	Ambiguous	MAPK1	CHEMBL88272		DTC
ERK	MAPK1	Ambiguous	MAPK1	YUANHUADINE		DTC	21916433
ERK	MAPK1	Ambiguous	MAPK1	CHEMBL586031		DTC
ERK	MAPK1	Ambiguous	MAPK1	ETHER		NCI	16081674
ERK	MAPK1	Ambiguous	MAPK1	ZAFIRLUKAST		DTC
ERK	MAPK1	Ambiguous	MAPK1	MIBEFRADIL		DTC
ERK	MAPK1	Ambiguous	MAPK1	PLUMBAGIN		DTC
ERK	MAPK1	Ambiguous	MAPK1	ALSTERPAULLONE		DTC
ERK	MAPK1	Ambiguous	MAPK1	CHEMBL578741		DTC
ERK	MAPK1	Ambiguous	MAPK1	CHEMBL1939691		DTC
ERK	MAPK1	Ambiguous	MAPK1	GAMBOGIC ACID		DTC	17911251
ERK	MAPK1	Ambiguous	MAPK1	HAEMATOXYLIN		DTC
ERK	MAPK1	Ambiguous	MAPK1	THIMEROSAL		DTC
ERK	MAPK1	Ambiguous	MAPK1	CHEMBL530280		DTC
ERK	MAPK1	Ambiguous	MAPK1	PESUDOGINSENOSIDE RP1 METHYL ESTER		DTC	20951582
ERK	MAPK1	Ambiguous	MAPK1	DAUNORUBICIN HYDROCHLORIDE		DTC
ERK	MAPK1	Ambiguous	MAPK1	CHEMBL484662		DTC
ERK	MAPK1	Ambiguous	MAPK1	CHEMBL76589		DTC
ERK	MAPK1	Ambiguous	MAPK1	GOSSYPOL		DTC
ERK	MAPK1	Ambiguous	MAPK1	BISINDOLYLMALEIMIDE IX		DTC
ERK	MAPK1	Ambiguous	MAPK1	SANGUINARINE SULFATE		DTC
ERK	MAPK1	Ambiguous	MAPK1	DEMETHYLWEDELOLACTONE		DTC	22926226
ERK	MAPK1	Ambiguous	MAPK1	LITHOCHOLIC ACID		DTC
ERK	MAPK1	Ambiguous	MAPK1	CHEMBL35482		DTC
ERK	MAPK1	Ambiguous	MAPK1	OPHIOBOLIN O		DTC	22130129
ERK	MAPK1	Ambiguous	MAPK1	CHEMBL609606		DTC
ERK	MAPK1	Ambiguous	MAPK1	CHEMBL1485809		DTC
ERK	MAPK1	Ambiguous	MAPK1	MK-8353	inhibitor	ChemblInteractions
ERK	MAPK1	Ambiguous	MAPK1	MADOLIN T		DTC
ERK	MAPK1	Ambiguous	MAPK1	SAPPANONE A TRIMETHYL ETHER		DTC
ERK	MAPK1	Ambiguous	MAPK1	ECONAZOLE NITRATE		DTC
ERK	MAPK1	Ambiguous	MAPK1	CHEMBL29197		DTC	17681471
ERK	MAPK1	Ambiguous	MAPK1	CHEMBL154580		DTC
ERK	MAPK1	Ambiguous	MAPK1	ETOPOSIDE		DTC	23999041
ERK	MAPK1	Ambiguous	MAPK1	COMBRETASTATIN A4		DTC	22982122
ERK	MAPK1	Ambiguous	MAPK1	CLOTRIMAZOLE		DTC
ERK	MAPK1	Ambiguous	MAPK1	URACIL		NCI	17076658
ERK	MAPK1	Ambiguous	MAPK1	MITOXANTRONE		DTC
ERK	MAPK1	Ambiguous	MAPK1	CHLORHEXIDINE HYDROCHLORIDE		DTC
ERK	MAPK1	Ambiguous	MAPK1	CHEMBL222556		DTC
ERK	MAPK1	Ambiguous	MAPK1	ARISTOYUNNOLIN A		DTC
ERK	MAPK1	Ambiguous	MAPK1	SORAFENIB		PharmGKB	20124951
ERK	MAPK1	Ambiguous	MAPK1	MITOXANTRONE HYDROCHLORIDE		DTC
ERK	MAPK1	Ambiguous	MAPK1	CHEMBL1814509		DTC
ERK	MAPK1	Ambiguous	MAPK1	CHEMBL580340		DTC
ERK	MAPK1	Ambiguous	MAPK1	CHEMBL505670		DTC
ERK	MAPK1	Ambiguous	MAPK1	CHEMBL541400		DTC
ERK	MAPK1	Ambiguous	MAPK1	TYRPHOSTIN AG-1478		DTC
ERK	MAPK1	Ambiguous	MAPK1	FISETIN		DTC
ERK	MAPK1	Ambiguous	MAPK1	DAPH		DTC
ERK	MAPK1	Ambiguous	MAPK1	TRIFLUOPERAZINE		DTC
ERK	MAPK1	Ambiguous	MAPK1	CHEMBL2088730		DTC	22982122
ERK	MAPK1	Ambiguous	MAPK1	LEVODOPA		NCI	16139809
ERK	MAPK1	Ambiguous	MAPK1	GW282974X		DTC
ERK	MAPK1	Ambiguous	MAPK1	PIMOZIDE		DTC
ERK	MAPK1	Ambiguous	MAPK1	RELCOVAPTAN		DTC
ERK	MAPK1	Ambiguous	MAPK1	BUMETANIDE		NCI	11807827
ERK	MAPK1	Ambiguous	MAPK1	CHEMBL261557		DTC
ERK	MAPK1	Ambiguous	MAPK1	CALCIMYCIN		DTC
ERK	MAPK1	Ambiguous	MAPK1	CHEMBL597035		DTC
ERK	MAPK1	Ambiguous	MAPK1	CHEMBL126804		DTC
ERK	MAPK1	Ambiguous	MAPK1	GUTHION		DTC
ERK	MAPK1	Ambiguous	MAPK1	CHEMBL581194		DTC
ERK	MAPK1	Ambiguous	MAPK1	ULIXERTINIB	inhibitor	ChemblInteractions|TTD	28939558
ERK	MAPK1	Ambiguous	MAPK1	RAVOXERTINIB	inhibitor	ChemblInteractions|TTD	25320010
CREB1, CREB	CREB1	Definite	CREB1	ALCOHOL		NCI	11181917
CREB1, CREB	CREB1	Definite	CREB1	NICOTINE		NCI	11331423
CREB1, CREB	CREB1	Definite	CREB1	LITHIUM		PharmGKB	24885933
CREB1, CREB	CREB1	Definite	CREB1	CITALOPRAM		PharmGKB	20643483|17548750
EPAS1	EPAS1	Definite	EPAS1	NEOPETROFORMYNE A		DTC	22928967
EPAS1	EPAS1	Definite	EPAS1	HALICLONADIAMINE		DTC	22928967
EPAS1	EPAS1	Definite	EPAS1	PUUPEHENONE		DTC	22928967
HIF1A	HIF1A	Definite	HIF1A	PX-478	inhibitor	TALC|TdgClinicalTrial
HIF1A	HIF1A	Definite	HIF1A	NITROGLYCERIN	inhibitor	MyCancerGenomeClinicalTrial
HIF1A	HIF1A	Definite	HIF1A	DEPHOSTATIN		DTC
HIF1A	HIF1A	Definite	HIF1A	CHEMBL1588679		DTC
HIF1A	HIF1A	Definite	HIF1A	8-AZAGUANINE		DTC
HIF1A	HIF1A	Definite	HIF1A	TIRATRICOL		DTC
HIF1A	HIF1A	Definite	HIF1A	BENZBROMARONE		DTC
HIF1A	HIF1A	Definite	HIF1A	FUSARIC ACID		DTC
HIF1A	HIF1A	Definite	HIF1A	DEOXIEPINEPHRINE		DTC
HIF1A	HIF1A	Definite	HIF1A	CHEMBL287689		DTC
HIF1A	HIF1A	Definite	HIF1A	CHEMBL311489		DTC
HIF1A	HIF1A	Definite	HIF1A	HYDROCORTISONE		DTC
HIF1A	HIF1A	Definite	HIF1A	ELLIPTECINE		DTC
HIF1A	HIF1A	Definite	HIF1A	RUTAECARPINE		DTC
HIF1A	HIF1A	Definite	HIF1A	NIFEDIPINE		DTC
HIF1A	HIF1A	Definite	HIF1A	(S)APOMORPHINE		DTC
HIF1A	HIF1A	Definite	HIF1A	TOPOTECAN HYDROCHLORIDE		DTC
HIF1A	HIF1A	Definite	HIF1A	FUROSPONGOLIDE		DTC	18989978
HIF1A	HIF1A	Definite	HIF1A	ACACETIN		DTC
HIF1A	HIF1A	Definite	HIF1A	TANESPIMYCIN		DTC	23153200
HIF1A	HIF1A	Definite	HIF1A	E324		DTC
HIF1A	HIF1A	Definite	HIF1A	CHRYSIN		DTC
HIF1A	HIF1A	Definite	HIF1A	CATECHOL		DTC
HIF1A	HIF1A	Definite	HIF1A	ZAPRINAST		DTC
HIF1A	HIF1A	Definite	HIF1A	VINCRISTINE SULFATE		DTC
HIF1A	HIF1A	Definite	HIF1A	PROCATEROL HYDROCHLORIDE		DTC
HIF1A	HIF1A	Definite	HIF1A	CHEMBL1492017		DTC
HIF1A	HIF1A	Definite	HIF1A	TRETINOIN		DTC
HIF1A	HIF1A	Definite	HIF1A	APIGENIN		DTC
HIF1A	HIF1A	Definite	HIF1A	SULFASALAZINE		DTC
HIF1A	HIF1A	Definite	HIF1A	CHEMBL471225		DTC
HIF1A	HIF1A	Definite	HIF1A	DOPAMINE		DTC
HIF1A	HIF1A	Definite	HIF1A	LORATADINE		DTC
HIF1A	HIF1A	Definite	HIF1A	OXYTETRACYCLINE		DTC
HIF1A	HIF1A	Definite	HIF1A	ETHAMSYLATE		DTC
HIF1A	HIF1A	Definite	HIF1A	ETICLOPRIDE		DTC
HIF1A	HIF1A	Definite	HIF1A	PHENOXYBENZAMINE HYDROCHLORIDE		DTC
HIF1A	HIF1A	Definite	HIF1A	CHEMBL261557		DTC
HIF1A	HIF1A	Definite	HIF1A	SORAFENIB		PharmGKB	25816720
HIF1A	HIF1A	Definite	HIF1A	HALICLONADIAMINE		DTC	22928967
HIF1A	HIF1A	Definite	HIF1A	DICLOFENAC SODIUM		DTC
HIF1A	HIF1A	Definite	HIF1A	DEFEROXAMINE		NCI	15780758
HIF1A	HIF1A	Definite	HIF1A	PIRETANIDE		DTC
HIF1A	HIF1A	Definite	HIF1A	PARAROSANILINE		DTC
HIF1A	HIF1A	Definite	HIF1A	ISOETHARINE MESYLATE		DTC
HIF1A	HIF1A	Definite	HIF1A	EPINEPHRINE		DTC
HIF1A	HIF1A	Definite	HIF1A	(R)-MELPHALAN		DTC
HIF1A	HIF1A	Definite	HIF1A	QUERCETIN		DTC
HIF1A	HIF1A	Definite	HIF1A	DIOXYBENZONE		DTC
HIF1A	HIF1A	Definite	HIF1A	TOLFENAMIC ACID		DTC
HIF1A	HIF1A	Definite	HIF1A	CHEMBL1256291		DTC
HIF1A	HIF1A	Definite	HIF1A	CLEMIZOLE		DTC
HIF1A	HIF1A	Definite	HIF1A	CHEMBL322970		DTC
HIF1A	HIF1A	Definite	HIF1A	PIMONIDAZOLE		NCI	12829158
HIF1A	HIF1A	Definite	HIF1A	CHEMBL515505		DTC
HIF1A	HIF1A	Definite	HIF1A	CHEMBL56393		DTC
HIF1A	HIF1A	Definite	HIF1A	EMETINE		DTC	15974627
HIF1A	HIF1A	Definite	HIF1A	TRIAMTERENE		DTC
HIF1A	HIF1A	Definite	HIF1A	TYRPHOSTIN 47		DTC
HIF1A	HIF1A	Definite	HIF1A	CHEMBL253989		DTC
HIF1A	HIF1A	Definite	HIF1A	DIETHYLSTILBESTROL DIPROPIONATE		DTC
HIF1A	HIF1A	Definite	HIF1A	CHEMBL362223		DTC
HIF1A	HIF1A	Definite	HIF1A	FLUFENAMIC ACID		DTC
HIF1A	HIF1A	Definite	HIF1A	CHEMBL285819		DTC
HIF1A	HIF1A	Definite	HIF1A	PROPYLPYRAZOLETRIOL		DTC
HIF1A	HIF1A	Definite	HIF1A	PURVALANOLA		DTC
HIF1A	HIF1A	Definite	HIF1A	BENZAMIL		DTC
HIF1A	HIF1A	Definite	HIF1A	CHEMBL329673		DTC
HIF1A	HIF1A	Definite	HIF1A	TYRPHOSTIN AG 879		DTC
HIF1A	HIF1A	Definite	HIF1A	AMCINONIDE		DTC
HIF1A	HIF1A	Definite	HIF1A	NOSCAPINE		TdgClinicalTrial
HIF1A	HIF1A	Definite	HIF1A	EPINEPHRINE BITARTRATE		DTC
HIF1A	HIF1A	Definite	HIF1A	CHEMBL80155		DTC
HIF1A	HIF1A	Definite	HIF1A	MEFENAMIC ACID		DTC
HIF1A	HIF1A	Definite	HIF1A	DEQUALINIUM		DTC
HIF1A	HIF1A	Definite	HIF1A	NICLOSAMIDE		DTC
HIF1A	HIF1A	Definite	HIF1A	CHEMBL56731		DTC
HIF1A	HIF1A	Definite	HIF1A	OXETHAZAINE		DTC
HIF1A	HIF1A	Definite	HIF1A	CHEMBL1317986		DTC
HIF1A	HIF1A	Definite	HIF1A	TYRPHOSTIN A9		DTC
HIF1A	HIF1A	Definite	HIF1A	AXITINIB		PharmGKB	25816720
HIF1A	HIF1A	Definite	HIF1A	MECLOFENAMATE SODIUM		DTC
HIF1A	HIF1A	Definite	HIF1A	CHLOROETHYLCLONIDINE		DTC
HIF1A	HIF1A	Definite	HIF1A	CHEMBL53898		DTC
HIF1A	HIF1A	Definite	HIF1A	KAEMPFEROL		DTC
HIF1A	HIF1A	Definite	HIF1A	HYDROQUINONE		DTC
HIF1A	HIF1A	Definite	HIF1A	GW7647		DTC
HIF1A	HIF1A	Definite	HIF1A	EPOETIN ALFA		NCI	11986208|11971899|12717822
HIF1A	HIF1A	Definite	HIF1A	CIS-RESVERATROL		DTC
HIF1A	HIF1A	Definite	HIF1A	CHEMBL1438389		DTC
HIF1A	HIF1A	Definite	HIF1A	DESOXIMETASONE		DTC
HIF1A	HIF1A	Definite	HIF1A	FLUPIRTINE		DTC
HIF1A	HIF1A	Definite	HIF1A	CGS-15943		DTC
HIF1A	HIF1A	Definite	HIF1A	MANASSANTIN B		DTC	15165135
HIF1A	HIF1A	Definite	HIF1A	CHEMBL1256697		DTC
HIF1A	HIF1A	Definite	HIF1A	ESCULETIN		DTC
HIF1A	HIF1A	Definite	HIF1A	BECLOMETHASONE		DTC
HIF1A	HIF1A	Definite	HIF1A	TPCK		DTC
HIF1A	HIF1A	Definite	HIF1A	FLUNARIZINE DIHYDROCHLORIDE		DTC
HIF1A	HIF1A	Definite	HIF1A	NOREPINEPHRINE BITARTRATE		DTC
HIF1A	HIF1A	Definite	HIF1A	SPIPERONE		DTC
HIF1A	HIF1A	Definite	HIF1A	INAMRINONE		DTC
HIF1A	HIF1A	Definite	HIF1A	EPICATECHIN GALLATE		DTC	15620252
HIF1A	HIF1A	Definite	HIF1A	RESVERATROL		DTC
HIF1A	HIF1A	Definite	HIF1A	BENZO[B]FLUORANTHENE		DTC
HIF1A	HIF1A	Definite	HIF1A	CHEMBL451226		DTC
HIF1A	HIF1A	Definite	HIF1A	AMFONELIC ACID		DTC
HIF1A	HIF1A	Definite	HIF1A	DIBENZ[A,H]ANTHRACENE		DTC
HIF1A	HIF1A	Definite	HIF1A	CHEMBL1528359		DTC
HIF1A	HIF1A	Definite	HIF1A	CHEMBL56543		DTC
HIF1A	HIF1A	Definite	HIF1A	CYCLOHEXIMIDE		DTC	15974627
HIF1A	HIF1A	Definite	HIF1A	CHEMBL336095		DTC
HIF1A	HIF1A	Definite	HIF1A	SALICYLHYDROXAMIC ACID		DTC
HIF1A	HIF1A	Definite	HIF1A	CHEMBL434063		DTC
HIF1A	HIF1A	Definite	HIF1A	CHEMBL458765		DTC
HIF1A	HIF1A	Definite	HIF1A	LEVONORDEFRIN		DTC
HIF1A	HIF1A	Definite	HIF1A	HYCANTHONE		DTC
HIF1A	HIF1A	Definite	HIF1A	KLUGINE		DTC	15974627
HIF1A	HIF1A	Definite	HIF1A	CAMPTOTHECIN		DTC
HIF1A	HIF1A	Definite	HIF1A	CHEMBL68534		DTC
HIF1A	HIF1A	Definite	HIF1A	ISOPROTERENOL		DTC
HIF1A	HIF1A	Definite	HIF1A	PUUPEHENONE		DTC	22928967
HIF1A	HIF1A	Definite	HIF1A	GELDANAMYCIN		NCI	12811834
HIF1A	HIF1A	Definite	HIF1A	PIMOZIDE		DTC
HIF1A	HIF1A	Definite	HIF1A	CLOTRIMAZOLE		DTC
HIF1A	HIF1A	Definite	HIF1A	CYCLOSERINE		DTC
HIF1A	HIF1A	Definite	HIF1A	DIACYLGLYCEROL KINASE INHIBITOR II		DTC
HIF1A	HIF1A	Definite	HIF1A	ISOCEPHAELINE		DTC	15974627
HIF1A	HIF1A	Definite	HIF1A	PROMAZINE		DTC
HIF1A	HIF1A	Definite	HIF1A	BOLDINE		DTC
HIF1A	HIF1A	Definite	HIF1A	IODOQUINOL		DTC
HIF1A	HIF1A	Definite	HIF1A	NEOPETROFORMYNE A		DTC	22928967
HIF1A	HIF1A	Definite	HIF1A	CHEMBL239439		DTC
HIF1A	HIF1A	Definite	HIF1A	OXATOMIDE		DTC
HIF1A	HIF1A	Definite	HIF1A	SP-600125		DTC
HIF1A	HIF1A	Definite	HIF1A	HESPERETIN		DTC
FSH	BRD2	Definite	BRD2	CHEMBL52030		DTC	22137933
FSH	BRD2	Definite	BRD2	BIRABRESIB		TTD
FSH	BRD2	Definite	BRD2	MIDAZOLAM		DTC	22137933
FSH	BRD2	Definite	BRD2	ACETAMINOPHEN		DTC	22136404
FSH	BRD2	Definite	BRD2	TRIAZOLAM		DTC	22137933
FSH	BRD2	Definite	BRD2	ALPRAZOLAM		DTC	22137933
FSH	BRD2	Definite	BRD2	ABBV-744		TTD
PKC	PRRT2	Ambiguous	PRRT2	BRYOSTATIN	inhibitor	MyCancerGenomeClinicalTrial
PKC	PKN2	Ambiguous	PKN2	LY-2090314		DTC
PKC	PKN2	Ambiguous	PKN2	ILORASERTIB		DTC
PKC	PKN2	Ambiguous	PKN2	RG-1530		DTC
PKC	PKN2	Ambiguous	PKN2	CHEMBL225519		DTC
PKC	PKN2	Ambiguous	PKN2	PF-00562271		DTC
PKC	PKN2	Ambiguous	PKN2	CENISERTIB		DTC
PKC	PKN2	Ambiguous	PKN2	GW441756X		DTC
PKC	PKN2	Ambiguous	PKN2	TOZASERTIB		DTC
PKC	PKN2	Ambiguous	PKN2	TAE-684		DTC
PKC	PKN2	Ambiguous	PKN2	ERLOTINIB		DTC
PKC	PKN2	Ambiguous	PKN2	QUERCETIN	inhibitor	MyCancerGenome
PKC	PKN2	Ambiguous	PKN2	ALSTERPAULLONE		DTC
PKC	PKN2	Ambiguous	PKN2	ENTRECTINIB		DTC
PKC	PKN2	Ambiguous	PKN2	CHEMBL379975		DTC
PKC	PKN2	Ambiguous	PKN2	SOTRASTAURIN		DTC
PKC	PKN2	Ambiguous	PKN2	GSK-269962A		DTC
PKC	PKN2	Ambiguous	PKN2	CHEMBL541400		DTC
PKC	PKN2	Ambiguous	PKN2	DASATINIB		DTC
PKC	PKN2	Ambiguous	PKN2	CYC-116		DTC
PKC	PKN2	Ambiguous	PKN2	DOVITINIB		DTC
PKC	PRKCH	Ambiguous	PRKCH	BRYOSTATIN		TdgClinicalTrial
PKC	PRKCH	Ambiguous	PRKCH	MIDOSTAURIN	inhibitor	ChemblInteractions
PKC	PRKCH	Ambiguous	PRKCH	GSK-690693	inhibitor	ChemblInteractions
PKC	PRKCH	Ambiguous	PRKCH	QUERCETIN	inhibitor	MyCancerGenome
PKC	PRKCH	Ambiguous	PRKCH	SOTRASTAURIN	inhibitor	ChemblInteractions
PKC	PRKCH	Ambiguous	PRKCH	UCN-01	inhibitor	ChemblInteractions
PKC	PRKCH	Ambiguous	PRKCH	CEP-2563	inhibitor	ChemblInteractions
PKC	PRKCI	Ambiguous	PRKCI	ILORASERTIB		DTC
PKC	PRKCI	Ambiguous	PRKCI	CENISERTIB		DTC
PKC	PRKCI	Ambiguous	PRKCI	MIDOSTAURIN	inhibitor	ChemblInteractions
PKC	PRKCI	Ambiguous	PRKCI	GSK-690693	inhibitor	ChemblInteractions
PKC	PRKCI	Ambiguous	PRKCI	QUERCETIN	inhibitor	MyCancerGenome
PKC	PRKCI	Ambiguous	PRKCI	SOTRASTAURIN	inhibitor	DTC|ChemblInteractions
PKC	PRKCI	Ambiguous	PRKCI	GSK-269962A		DTC
PKC	PRKCI	Ambiguous	PRKCI	UCN-01	inhibitor	ChemblInteractions
PKC	PRKCI	Ambiguous	PRKCI	CEP-2563	inhibitor	ChemblInteractions
PKC	PRKCG	Ambiguous	PRKCG	CHEMBL578061		DTC
PKC	PRKCG	Ambiguous	PRKCG	LAUROGUADINE		DTC
PKC	PRKCG	Ambiguous	PRKCG	SP-600125		DTC
PKC	PRKCG	Ambiguous	PRKCG	LY-2090314		DTC
PKC	PRKCG	Ambiguous	PRKCG	RG-1530		DTC
PKC	PRKCG	Ambiguous	PRKCG	ENZASTAURIN	inhibitor	MyCancerGenome
PKC	PRKCG	Ambiguous	PRKCG	PF-00562271		DTC
PKC	PRKCG	Ambiguous	PRKCG	SB-220025		DTC
PKC	PRKCG	Ambiguous	PRKCG	GO-6976		DTC
PKC	PRKCG	Ambiguous	PRKCG	CENISERTIB		DTC
PKC	PRKCG	Ambiguous	PRKCG	BRYOSTATIN		TdgClinicalTrial
PKC	PRKCG	Ambiguous	PRKCG	FASUDIL		DTC
PKC	PRKCG	Ambiguous	PRKCG	MIDOSTAURIN	inhibitor	ChemblInteractions|TTD
PKC	PRKCG	Ambiguous	PRKCG	GSK-690693	inhibitor	ChemblInteractions
PKC	PRKCG	Ambiguous	PRKCG	QUERCETIN	inhibitor	MyCancerGenome
PKC	PRKCG	Ambiguous	PRKCG	ENTRECTINIB		DTC
PKC	PRKCG	Ambiguous	PRKCG	SOTRASTAURIN	inhibitor	DTC|ChemblInteractions
PKC	PRKCG	Ambiguous	PRKCG	GSK-269962A		DTC
PKC	PRKCG	Ambiguous	PRKCG	UCN-01	inhibitor	ChemblInteractions
PKC	PRKCG	Ambiguous	PRKCG	R-406		DTC
PKC	PRKCG	Ambiguous	PRKCG	CEP-2563	inhibitor	ChemblInteractions
PKC	PRKCZ	Ambiguous	PRKCZ	LAUROGUADINE		DTC
PKC	PRKCZ	Ambiguous	PRKCZ	CHEMBL225519		DTC
PKC	PRKCZ	Ambiguous	PRKCZ	CENISERTIB		DTC
PKC	PRKCZ	Ambiguous	PRKCZ	TOZASERTIB		DTC
PKC	PRKCZ	Ambiguous	PRKCZ	MIDOSTAURIN	inhibitor	ChemblInteractions
PKC	PRKCZ	Ambiguous	PRKCZ	GSK-690693	inhibitor	ChemblInteractions
PKC	PRKCZ	Ambiguous	PRKCZ	QUERCETIN	inhibitor	MyCancerGenome
PKC	PRKCZ	Ambiguous	PRKCZ	SOTRASTAURIN	inhibitor	DTC|ChemblInteractions
PKC	PRKCZ	Ambiguous	PRKCZ	GSK-269962A		DTC
PKC	PRKCZ	Ambiguous	PRKCZ	UCN-01	inhibitor	ChemblInteractions
PKC	PRKCZ	Ambiguous	PRKCZ	CEP-2563	inhibitor	ChemblInteractions
PKC	PRKCB	Ambiguous	PRKCB	ENOXOLONE		DTC	24461294
PKC	PRKCB	Ambiguous	PRKCB	ENZASTAURIN	inhibitor	TALC|MyCancerGenome|TdgClinicalTrial|ChemblInteractions|TTD
PKC	PRKCB	Ambiguous	PRKCB	DEXMEDETOMIDINE		PharmGKB
PKC	PRKCB	Ambiguous	PRKCB	RUBOXISTAURIN	inhibitor	TdgClinicalTrial|ChemblInteractions
PKC	PRKCB	Ambiguous	PRKCB	BRYOSTATIN		DTC|TdgClinicalTrial	22579485
PKC	PRKCB	Ambiguous	PRKCB	MIDOSTAURIN	inhibitor	ChemblInteractions
PKC	PRKCB	Ambiguous	PRKCB	GSK-690693	inhibitor	ChemblInteractions
PKC	PRKCB	Ambiguous	PRKCB	QUERCETIN	inhibitor	MyCancerGenome
PKC	PRKCB	Ambiguous	PRKCB	SOTRASTAURIN	inhibitor	ChemblInteractions
PKC	PRKCB	Ambiguous	PRKCB	BISINDOLYLMALEIMIDE IX		DTC	25058929
PKC	PRKCB	Ambiguous	PRKCB	UCN-01	inhibitor	ChemblInteractions
PKC	PRKCB	Ambiguous	PRKCB	CEP-2563	inhibitor	ChemblInteractions
PKC	PRKCB	Ambiguous	PRKCB	ATENOLOL		PharmGKB
PKC	PRKCE	Ambiguous	PRKCE	CHEMBL27768		DTC	24794745
PKC	PRKCE	Ambiguous	PRKCE	ENZASTAURIN	inhibitor	MyCancerGenome
PKC	PRKCE	Ambiguous	PRKCE	MEPROBAMATE		TTD	23197040
PKC	PRKCE	Ambiguous	PRKCE	BRYOSTATIN		TdgClinicalTrial
PKC	PRKCE	Ambiguous	PRKCE	PHORBOL MYRISTATE ACETATE		DTC	22579485
PKC	PRKCE	Ambiguous	PRKCE	KAI-1678		TdgClinicalTrial
PKC	PRKCE	Ambiguous	PRKCE	MIDOSTAURIN	inhibitor	ChemblInteractions
PKC	PRKCE	Ambiguous	PRKCE	GSK-690693	inhibitor	ChemblInteractions
PKC	PRKCE	Ambiguous	PRKCE	QUERCETIN	inhibitor	MyCancerGenome
PKC	PRKCE	Ambiguous	PRKCE	SOTRASTAURIN	inhibitor	ChemblInteractions
PKC	PRKCE	Ambiguous	PRKCE	UCN-01	inhibitor	ChemblInteractions
PKC	PRKCE	Ambiguous	PRKCE	CEP-2563	inhibitor	ChemblInteractions
PKC	PKN3	Ambiguous	PKN3	ATU-027		TdgClinicalTrial|TTD
PKC	PKN3	Ambiguous	PKN3	QUERCETIN	inhibitor	MyCancerGenome
PKC	PKN1	Ambiguous	PKN1	QUERCETIN	inhibitor	MyCancerGenome
PKC	PRKD3	Ambiguous	PRKD3	SB-202190		DTC
PKC	PRKD3	Ambiguous	PRKD3	BMS-387032		DTC
PKC	PRKD3	Ambiguous	PRKD3	SP-600125		DTC
PKC	PRKD3	Ambiguous	PRKD3	PALBOCICLIB		DTC
PKC	PRKD3	Ambiguous	PRKD3	VX-702		DTC
PKC	PRKD3	Ambiguous	PRKD3	ILORASERTIB		DTC
PKC	PRKD3	Ambiguous	PRKD3	CHEMBL365617		DTC
PKC	PRKD3	Ambiguous	PRKD3	SB-431542		DTC
PKC	PRKD3	Ambiguous	PRKD3	CHEMBL1997335		DTC
PKC	PRKD3	Ambiguous	PRKD3	CHEMBL225519		DTC
PKC	PRKD3	Ambiguous	PRKD3	PF-00562271		DTC
PKC	PRKD3	Ambiguous	PRKD3	SB-220025		DTC
PKC	PRKD3	Ambiguous	PRKD3	CENISERTIB		DTC
PKC	PRKD3	Ambiguous	PRKD3	GW441756X		DTC
PKC	PRKD3	Ambiguous	PRKD3	ADAVOSERTIB		DTC
PKC	PRKD3	Ambiguous	PRKD3	BRYOSTATIN		TdgClinicalTrial
PKC	PRKD3	Ambiguous	PRKD3	GEFITINIB		DTC
PKC	PRKD3	Ambiguous	PRKD3	FASUDIL		DTC
PKC	PRKD3	Ambiguous	PRKD3	TAE-684		DTC
PKC	PRKD3	Ambiguous	PRKD3	PD-0166285		DTC
PKC	PRKD3	Ambiguous	PRKD3	MIDOSTAURIN	inhibitor	ChemblInteractions
PKC	PRKD3	Ambiguous	PRKD3	GSK-690693	inhibitor	ChemblInteractions
PKC	PRKD3	Ambiguous	PRKD3	QUERCETIN	inhibitor	MyCancerGenome
PKC	PRKD3	Ambiguous	PRKD3	R-1487		DTC
PKC	PRKD3	Ambiguous	PRKD3	SB-242235		DTC
PKC	PRKD3	Ambiguous	PRKD3	SOTRASTAURIN	inhibitor	ChemblInteractions
PKC	PRKD3	Ambiguous	PRKD3	GSK-269962A		DTC
PKC	PRKD3	Ambiguous	PRKD3	TAK-715		DTC
PKC	PRKD3	Ambiguous	PRKD3	JNJ-7706621		DTC
PKC	PRKD3	Ambiguous	PRKD3	UCN-01	inhibitor	ChemblInteractions
PKC	PRKD3	Ambiguous	PRKD3	GATIFLOXACIN		DTC
PKC	PRKD3	Ambiguous	PRKD3	BMS-345541		DTC
PKC	PRKD3	Ambiguous	PRKD3	CHEMBL541400		DTC
PKC	PRKD3	Ambiguous	PRKD3	R-406		DTC
PKC	PRKD3	Ambiguous	PRKD3	CYC-116		DTC
PKC	PRKD3	Ambiguous	PRKD3	DOVITINIB		DTC
PKC	PRKD3	Ambiguous	PRKD3	CEP-2563	inhibitor	ChemblInteractions
PKC	PRKCQ	Ambiguous	PRKCQ	CHEMBL546797		DTC
PKC	PRKCQ	Ambiguous	PRKCQ	CHEMBL1997335		DTC
PKC	PRKCQ	Ambiguous	PRKCQ	CHEMBL225519		DTC
PKC	PRKCQ	Ambiguous	PRKCQ	PF-00562271		DTC
PKC	PRKCQ	Ambiguous	PRKCQ	CENISERTIB		DTC
PKC	PRKCQ	Ambiguous	PRKCQ	ADAVOSERTIB		DTC
PKC	PRKCQ	Ambiguous	PRKCQ	BRYOSTATIN		TdgClinicalTrial
PKC	PRKCQ	Ambiguous	PRKCQ	FASUDIL		DTC
PKC	PRKCQ	Ambiguous	PRKCQ	TAE-684		DTC
PKC	PRKCQ	Ambiguous	PRKCQ	MIDOSTAURIN	inhibitor	ChemblInteractions
PKC	PRKCQ	Ambiguous	PRKCQ	GSK-690693	inhibitor	ChemblInteractions
PKC	PRKCQ	Ambiguous	PRKCQ	QUERCETIN	inhibitor	MyCancerGenome
PKC	PRKCQ	Ambiguous	PRKCQ	ENTRECTINIB		DTC
PKC	PRKCQ	Ambiguous	PRKCQ	CHEMBL379975		DTC
PKC	PRKCQ	Ambiguous	PRKCQ	SOTRASTAURIN	inhibitor	DTC|ChemblInteractions
PKC	PRKCQ	Ambiguous	PRKCQ	UCN-01	inhibitor	ChemblInteractions
PKC	PRKCQ	Ambiguous	PRKCQ	CEP-2563	inhibitor	ChemblInteractions
PKC	PRKD2	Ambiguous	PRKD2	LAUROGUADINE		DTC
PKC	PRKD2	Ambiguous	PRKD2	SP-600125		DTC
PKC	PRKD2	Ambiguous	PRKD2	CEDIRANIB		DTC
PKC	PRKD2	Ambiguous	PRKD2	CHEMBL210618		DTC
PKC	PRKD2	Ambiguous	PRKD2	RUCAPARIB		DTC
PKC	PRKD2	Ambiguous	PRKD2	VX-702		DTC
PKC	PRKD2	Ambiguous	PRKD2	ILORASERTIB		DTC
PKC	PRKD2	Ambiguous	PRKD2	CHEMBL365617		DTC
PKC	PRKD2	Ambiguous	PRKD2	CHEMBL225519		DTC
PKC	PRKD2	Ambiguous	PRKD2	PF-00562271		DTC
PKC	PRKD2	Ambiguous	PRKD2	DORAMAPIMOD		DTC
PKC	PRKD2	Ambiguous	PRKD2	SB-220025		DTC
PKC	PRKD2	Ambiguous	PRKD2	GO-6976		DTC
PKC	PRKD2	Ambiguous	PRKD2	CENISERTIB		DTC
PKC	PRKD2	Ambiguous	PRKD2	GW441756X		DTC
PKC	PRKD2	Ambiguous	PRKD2	BRYOSTATIN		TdgClinicalTrial
PKC	PRKD2	Ambiguous	PRKD2	SB-203580		DTC
PKC	PRKD2	Ambiguous	PRKD2	SNS-314		DTC
PKC	PRKD2	Ambiguous	PRKD2	GEFITINIB		DTC
PKC	PRKD2	Ambiguous	PRKD2	TOZASERTIB		DTC
PKC	PRKD2	Ambiguous	PRKD2	FASUDIL		DTC
PKC	PRKD2	Ambiguous	PRKD2	TAE-684		DTC
PKC	PRKD2	Ambiguous	PRKD2	ERLOTINIB		DTC
PKC	PRKD2	Ambiguous	PRKD2	QUERCETIN	inhibitor	MyCancerGenome
PKC	PRKD2	Ambiguous	PRKD2	R-1487		DTC
PKC	PRKD2	Ambiguous	PRKD2	AZD-1080		DTC
PKC	PRKD2	Ambiguous	PRKD2	GSK-269962A		DTC
PKC	PRKD2	Ambiguous	PRKD2	TAK-715		DTC
PKC	PRKD2	Ambiguous	PRKD2	BMS-345541		DTC
PKC	PRKD2	Ambiguous	PRKD2	CHEMBL541400		DTC
PKC	PRKD2	Ambiguous	PRKD2	R-406		DTC
PKC	PRKD2	Ambiguous	PRKD2	CYC-116		DTC
PKC	PRKD2	Ambiguous	PRKD2	DOVITINIB		DTC
PKC	PRKD1	Ambiguous	PRKD1	BRYOSTATIN		TdgClinicalTrial
PKC	PRKD1	Ambiguous	PRKD1	MIDOSTAURIN	inhibitor	ChemblInteractions
PKC	PRKD1	Ambiguous	PRKD1	GSK-690693	inhibitor	ChemblInteractions
PKC	PRKD1	Ambiguous	PRKD1	RESVERATROL		NCI	11008129
PKC	PRKD1	Ambiguous	PRKD1	QUERCETIN	inhibitor	MyCancerGenome
PKC	PRKD1	Ambiguous	PRKD1	SOTRASTAURIN	inhibitor	ChemblInteractions
PKC	PRKD1	Ambiguous	PRKD1	VASOPRESSIN		NCI	11514571
PKC	PRKD1	Ambiguous	PRKD1	UCN-01	inhibitor	ChemblInteractions
PKC	PRKD1	Ambiguous	PRKD1	CEP-2563	inhibitor	ChemblInteractions
PKC	PRKCD	Ambiguous	PRKCD	CHEMBL578061		DTC
PKC	PRKCD	Ambiguous	PRKCD	LAUROGUADINE		DTC
PKC	PRKCD	Ambiguous	PRKCD	CHEMBL27768		DTC	24794745
PKC	PRKCD	Ambiguous	PRKCD	LY-2090314		DTC
PKC	PRKCD	Ambiguous	PRKCD	ENOXOLONE		DTC	24461294
PKC	PRKCD	Ambiguous	PRKCD	ILORASERTIB		DTC
PKC	PRKCD	Ambiguous	PRKCD	RG-1530		DTC
PKC	PRKCD	Ambiguous	PRKCD	CHEMBL225519		DTC
PKC	PRKCD	Ambiguous	PRKCD	PF-00562271		DTC
PKC	PRKCD	Ambiguous	PRKCD	DELCASERTIB	inhibitor	TdgClinicalTrial|ChemblInteractions|TTD
PKC	PRKCD	Ambiguous	PRKCD	GO-6976		DTC
PKC	PRKCD	Ambiguous	PRKCD	CENISERTIB		DTC
PKC	PRKCD	Ambiguous	PRKCD	ROTTLERIN	inhibitor	DTC	22093759
PKC	PRKCD	Ambiguous	PRKCD	BRYOSTATIN		DTC|TdgClinicalTrial	22579485
PKC	PRKCD	Ambiguous	PRKCD	PHORBOL MYRISTATE ACETATE		DTC	24794745
PKC	PRKCD	Ambiguous	PRKCD	SNS-314		DTC
PKC	PRKCD	Ambiguous	PRKCD	FASUDIL		DTC
PKC	PRKCD	Ambiguous	PRKCD	TETRADECANOYL PHORBOL ACETATE		DTC	20121237
PKC	PRKCD	Ambiguous	PRKCD	TAE-684		DTC
PKC	PRKCD	Ambiguous	PRKCD	MIDOSTAURIN	inhibitor	ChemblInteractions
PKC	PRKCD	Ambiguous	PRKCD	ALCOHOL		NCI	1744136
PKC	PRKCD	Ambiguous	PRKCD	GSK-690693	inhibitor	ChemblInteractions
PKC	PRKCD	Ambiguous	PRKCD	QUERCETIN	inhibitor	MyCancerGenome
PKC	PRKCD	Ambiguous	PRKCD	ALSTERPAULLONE		DTC
PKC	PRKCD	Ambiguous	PRKCD	SOTRASTAURIN	inhibitor	ChemblInteractions
PKC	PRKCD	Ambiguous	PRKCD	GSK-269962A		DTC
PKC	PRKCD	Ambiguous	PRKCD	UCN-01	inhibitor	ChemblInteractions
PKC	PRKCD	Ambiguous	PRKCD	DOVITINIB		DTC
PKC	PRKCD	Ambiguous	PRKCD	DIMETHYLADENINE		DTC
PKC	PRKCD	Ambiguous	PRKCD	CEP-2563	inhibitor	ChemblInteractions
PKC	PRKCA	Ambiguous	PRKCA	CHEMBL27768		DTC	24794745
PKC	PRKCA	Ambiguous	PRKCA	ENOXOLONE		DTC	24461294
PKC	PRKCA	Ambiguous	PRKCA	ENZASTAURIN	inhibitor	MyCancerGenome
PKC	PRKCA	Ambiguous	PRKCA	BRYOSTATIN		DTC|TdgClinicalTrial	22579485
PKC	PRKCA	Ambiguous	PRKCA	DIMETHYLSPINGOSINE		DTC	19469544
PKC	PRKCA	Ambiguous	PRKCA	CI-1040		TTD
PKC	PRKCA	Ambiguous	PRKCA	BEVACIZUMAB		PharmGKB	29871907
PKC	PRKCA	Ambiguous	PRKCA	PHORBOL MYRISTATE ACETATE		DTC	24794745
PKC	PRKCA	Ambiguous	PRKCA	MIDOSTAURIN	antagonist|inhibitor	MyCancerGenome|ChemblInteractions	16969355
PKC	PRKCA	Ambiguous	PRKCA	REDIOCIDE A		DTC	22650618
PKC	PRKCA	Ambiguous	PRKCA	GSK-690693	inhibitor	ChemblInteractions
PKC	PRKCA	Ambiguous	PRKCA	RESVERATROL		DTC	21880495
PKC	PRKCA	Ambiguous	PRKCA	QUERCETIN	inhibitor	MyCancerGenome
PKC	PRKCA	Ambiguous	PRKCA	SOTRASTAURIN	inhibitor	ChemblInteractions
PKC	PRKCA	Ambiguous	PRKCA	UCN-01	inhibitor	ChemblInteractions
PKC	PRKCA	Ambiguous	PRKCA	APRINOCARSEN	antisense oligonucleotide	TALC	15868384|16424642
PKC	PRKCA	Ambiguous	PRKCA	TRISMETHOXYRESVERATROL		DTC	21880495
PKC	PRKCA	Ambiguous	PRKCA	CEP-2563	inhibitor	ChemblInteractions
PKC	PRKCA	Ambiguous	PRKCA	HYDROCHLOROTHIAZIDE		PharmGKB
TNF	TNF	Definite	TNF	INFLIXIMAB	inhibitor	TdgClinicalTrial|ChemblInteractions|TEND|PharmGKB|TTD	16720636|16909270|23057546|16456024|26244882|12847678|18050183|18713756|19365401|22760475|16052578|24192118|12110154|17343250|22960943|15481318|15691299|15674127|15804598|22129793|11752352|25311255|12190096|18438841|15691217|17673491|15695296|17642244|16622728
TNF	TNF	Definite	TNF	ONERCEPT	inhibitor	ChemblInteractions
TNF	TNF	Definite	TNF	AZ9773	inhibitor	ChemblInteractions
TNF	TNF	Definite	TNF	VADIMEZAN	inducer	TALC
TNF	TNF	Definite	TNF	AFELIMOMAB	inhibitor	ChemblInteractions	10829362
TNF	TNF	Definite	TNF	CERTOLIZUMAB PEGOL	inhibitor	ChemblInteractions
TNF	TNF	Definite	TNF	ADALIMUMAB	inhibitor|antibody	TdgClinicalTrial|ChemblInteractions|TEND|PharmGKB|TTD	12044041|16720636|16909270|23057546|15022409|26244882|12847678|18050183|18713756|19365401|22760475|24192118|14532145|17343250|22960943|15046527|22129793|11752352|12190096|18438841|15200343
TNF	TNF	Definite	TNF	NERELIMOMAB	inhibitor	ChemblInteractions
TNF	TNF	Definite	TNF	ETANERCEPT	antibody|inhibitor	TdgClinicalTrial|ChemblInteractions|TEND|PharmGKB|TTD	16720636|16909270|23057546|26244882|12847678|18050183|18713756|19365401|22760475|24192118|17343250|22960943|10375846|10405518|10206649|22129793|11752352|12190096|10338381|18438841|10357816
TNF	TNF	Definite	TNF	LENERCEPT	inhibitor	ChemblInteractions
TNF	TNF	Definite	TNF	OZORALIZUMAB	inhibitor	TdgClinicalTrial|ChemblInteractions
TNF	TNF	Definite	TNF	PLACULUMAB	inhibitor	TdgClinicalTrial|ChemblInteractions|TTD
TNF	TNF	Definite	TNF	PEGSUNERCEPT	inhibitor	ChemblInteractions|TTD
TNF	TNF	Definite	TNF	THALIDOMIDE	inhibitor	TdgClinicalTrial|TEND|TTD	8755512|12046682|12167383|12105857|12102294|11752352|12113124
TNF	TNF	Definite	TNF	GOLIMUMAB	antibody|inhibitor	TdgClinicalTrial|ChemblInteractions|TEND|TTD	21079302
TNF	TNF	Definite	TNF	MILTEFOSINE		NCI	7883777
TNF	TNF	Definite	TNF	ISONIAZID		PharmGKB	22151084
TNF	TNF	Definite	TNF	ORTATAXEL		TTD
TNF	TNF	Definite	TNF	PF-04236921		TdgClinicalTrial
TNF	TNF	Definite	TNF	BUPIVACAINE		NCI	15781526
TNF	TNF	Definite	TNF	REMTOLUMAB		TTD
TNF	TNF	Definite	TNF	GEMCITABINE		PharmGKB	31616045
TNF	TNF	Definite	TNF	PROPYLTHIOURACIL		NCI	15119959
TNF	TNF	Definite	TNF	OMEPRAZOLE		NCI	16815316
TNF	TNF	Definite	TNF	ABBV-257		TTD
TNF	TNF	Definite	TNF	ENBREL		TTD
TNF	TNF	Definite	TNF	PYRAZINAMIDE		PharmGKB	22151084
TNF	TNF	Definite	TNF	NAFAMOSTAT		TTD
TNF	TNF	Definite	TNF	RIFAMPIN		PharmGKB	22151084
TNF	TNF	Definite	TNF	AMPHOTERICIN B		DTC
TNF	TNF	Definite	TNF	ETHAMBUTOL		PharmGKB	22151084
TNF	TNF	Definite	TNF	CARBAMAZEPINE		NCI|PharmGKB	15565432|11294926
TNF	TNF	Definite	TNF	ATORVASTATIN		PharmGKB	18997459
TNF	TNF	Definite	TNF	LACTULOSE		NCI	11226652
TNF	TNF	Definite	TNF	INSULIN		NCI	16125526|9287059
TNF	TNF	Definite	TNF	CEFOTAXIME		NCI	8354907|10989981
TNF	TNF	Definite	TNF	CELASTROL		TTD
TNF	TNF	Definite	TNF	METHIMAZOLE		NCI	8491516
TNF	TNF	Definite	TNF	DERSALAZINE		TdgClinicalTrial
TNF	TNF	Definite	TNF	SPIRONOLACTONE		NCI	16837769
TNF	TNF	Definite	TNF	RABEPRAZOLE		NCI	16815316
TNF	TNF	Definite	TNF	CYCLOSPORINE		PharmGKB	18444945
TNF	TNF	Definite	TNF	STAVUDINE		PharmGKB	20887379
TNF	TNF	Definite	TNF	CERTOLIZUMAB		TTD
TNF	TNF	Definite	TNF	MEROPENEM		NCI	8354907
TNF	TNF	Definite	TNF	LENALIDOMIDE		ClearityFoundationClinicalTrial|TTD
TNF	TNF	Definite	TNF	LENABASUM		TTD
TNF	TNF	Definite	TNF	SOBLIDOTIN		NCI	11855751
TNF	TNF	Definite	TNF	ALTEPLASE		NCI	8615653
TNF	TNF	Definite	TNF	MIDAZOLAM		NCI	16406030
TNF	TNF	Definite	TNF	HALOFUGINONE		NCI	16769768
TNF	TNF	Definite	TNF	DIDANOSINE		NCI	9430255
TNF	TNF	Definite	TNF	RUTIN		NCI	12423426
TNF	TNF	Definite	TNF	BENZO[E]PYRENE		DTC
TNF	TNF	Definite	TNF	DIGOXIN		DTC
TNF	TNF	Definite	TNF	RISPERIDONE		NCI	15567770|11545247
TNF	TNF	Definite	TNF	PYRIDOXINE		NCI	16277693
TNF	TNF	Definite	TNF	HYDROXYCHLOROQUINE		NCI	9002011
TNF	TNF	Definite	TNF	METHYLENE BLUE		DTC
TNF	TNF	Definite	TNF	BCG VACCINE		NCI	10022737
TNF	TNF	Definite	TNF	CARBOPLATIN		PharmGKB	31616045
TNF	TNF	Definite	TNF	GENTAMICIN		NCI	14565862
TNF	TNF	Definite	TNF	PENTOXIFYLLINE		TTD
TNF	TNF	Definite	TNF	SORAFENIB		PharmGKB	22736425
TNF	TNF	Definite	TNF	HOMIDIUM BROMIDE		DTC
TNF	TNF	Definite	TNF	5,7-DIHYDROXY-4-METHYLCOUMARIN		DTC
TNF	TNF	Definite	TNF	GLIMEPIRIDE		NCI	14686960
TNF	TNF	Definite	TNF	LAPACHONE		NCI	10075082
EGF	EGF	Definite	EGF	NIMOTUZUMAB		TdgClinicalTrial
EGF	EGF	Definite	EGF	PANITUMUMAB		PharmGKB
EGF	EGF	Definite	EGF	CETUXIMAB		CIViC|PharmGKB	25677871|23959273|16788380|27897268|18349392
PDGFB	PDGFB	Definite	PDGFB	SUNITINIB	inhibitor	CIViC|MyCancerGenomeClinicalTrial	29760553
PDGFB	PDGFB	Definite	PDGFB	AXITINIB	inhibitor	CancerCommons
PDGFB	PDGFB	Definite	PDGFB	PEGPLERANIB SODIUM	inhibitor	ChemblInteractions|TTD
PDGFB	PDGFB	Definite	PDGFB	IMATINIB		OncoKB
MAPK14	MAPK14	Definite	MAPK14	AMG-548	inhibitor	ChemblInteractions
MAPK14	MAPK14	Definite	MAPK14	SC-80036	inhibitor	ChemblInteractions
MAPK14	MAPK14	Definite	MAPK14	SEMAPIMOD	inhibitor	TdgClinicalTrial|ChemblInteractions|TTD
MAPK14	MAPK14	Definite	MAPK14	R-1487	inhibitor	ChemblInteractions	21375264
MAPK14	MAPK14	Definite	MAPK14	DORAMAPIMOD	inhibitor	DTC|ChemblInteractions	18602262|17139284|17016423
MAPK14	MAPK14	Definite	MAPK14	AZD-6703	inhibitor	ChemblInteractions
MAPK14	MAPK14	Definite	MAPK14	RWJ-67657	inhibitor	ChemblInteractions
MAPK14	MAPK14	Definite	MAPK14	PH-797804	inhibitor	TdgClinicalTrial|ChemblInteractions	10592235
MAPK14	MAPK14	Definite	MAPK14	TALMAPIMOD	inhibitor	DTC|TdgClinicalTrial|ChemblInteractions	19195885
MAPK14	MAPK14	Definite	MAPK14	TA-5493	inhibitor	ChemblInteractions
MAPK14	MAPK14	Definite	MAPK14	SCIO-323	inhibitor	ChemblInteractions
MAPK14	MAPK14	Definite	MAPK14	PG-760564	inhibitor	ChemblInteractions
MAPK14	MAPK14	Definite	MAPK14	RALIMETINIB	inhibitor	ClearityFoundationClinicalTrial|ChemblInteractions
MAPK14	MAPK14	Definite	MAPK14	LOSMAPIMOD	inhibitor	ChemblInteractions|TTD
MAPK14	MAPK14	Definite	MAPK14	VX-702	inhibitor	TdgClinicalTrial|ChemblInteractions|TTD
MAPK14	MAPK14	Definite	MAPK14	DILMAPIMOD	inhibitor	TdgClinicalTrial|ChemblInteractions|TTD
MAPK14	MAPK14	Definite	MAPK14	RO-3201195	inhibitor	DTC|ChemblInteractions	18539026|16509574|10592235
MAPK14	MAPK14	Definite	MAPK14	FX-005	inhibitor	ChemblInteractions
MAPK14	MAPK14	Definite	MAPK14	PEXMETINIB	inhibitor	TdgClinicalTrial|ChemblInteractions
MAPK14	MAPK14	Definite	MAPK14	GSK-610677	inhibitor	ChemblInteractions|TTD
MAPK14	MAPK14	Definite	MAPK14	NEFLAMAPIMOD	inhibitor	DTC|ChemblInteractions|TTD	24900264|10592235|17659871
MAPK14	MAPK14	Definite	MAPK14	PS-516895	inhibitor	ChemblInteractions
MAPK14	MAPK14	Definite	MAPK14	AVE-9940	inhibitor	ChemblInteractions
MAPK14	MAPK14	Definite	MAPK14	BMS-582949	inhibitor	TdgClinicalTrial|ChemblInteractions
MAPK14	MAPK14	Definite	MAPK14	SD-0006	inhibitor	ChemblInteractions	10592235
MAPK14	MAPK14	Definite	MAPK14	LY-3007113	inhibitor	ChemblInteractions
MAPK14	MAPK14	Definite	MAPK14	PAMAPIMOD	inhibitor	ChemblInteractions
MAPK14	MAPK14	Definite	MAPK14	AZD-7624	inhibitor	ChemblInteractions
MAPK14	MAPK14	Definite	MAPK14	SB-85635	inhibitor	ChemblInteractions
MAPK14	MAPK14	Definite	MAPK14	TAK-715	inhibitor	ChemblInteractions
MAPK14	MAPK14	Definite	MAPK14	LEO-15520	inhibitor	ChemblInteractions
MAPK14	MAPK14	Definite	MAPK14	ARRY-797	inhibitor	TdgClinicalTrial|ChemblInteractions
MAPK14	MAPK14	Definite	MAPK14	ACUMAPIMOD	inhibitor	ChemblInteractions
MAPK14	MAPK14	Definite	MAPK14	PF-03715455	inhibitor	ChemblInteractions
MAPK14	MAPK14	Definite	MAPK14	KC-706	inhibitor	ChemblInteractions
MAPK14	MAPK14	Definite	MAPK14	OSI-632		DTC
MAPK14	MAPK14	Definite	MAPK14	CHEMBL1997335		DTC
MAPK14	MAPK14	Definite	MAPK14	DOXYCYCLINE		NCI	16643899
MAPK14	MAPK14	Definite	MAPK14	RG-1530		DTC
MAPK14	MAPK14	Definite	MAPK14	CRYPTOLEPINE HYDROCHLORIDE		DTC	23507189
MAPK14	MAPK14	Definite	MAPK14	RHAMNETIN		DTC	24397781
MAPK14	MAPK14	Definite	MAPK14	MORPHINE		NCI	11937560
MAPK14	MAPK14	Definite	MAPK14	GW775608X		DTC	18602262
MAPK14	MAPK14	Definite	MAPK14	VASOPRESSIN		NCI	10679516|11029753
MAPK14	MAPK14	Definite	MAPK14	CI-1040		TTD
MAPK14	MAPK14	Definite	MAPK14	ILORASERTIB		DTC
MAPK14	MAPK14	Definite	MAPK14	LINIFANIB		DTC
MAPK14	MAPK14	Definite	MAPK14	CHEMBL406845		DTC
MAPK14	MAPK14	Definite	MAPK14	CHEMBL8483		DTC	18566250
MAPK14	MAPK14	Definite	MAPK14	CHEMBL261641		DTC	17595299
MAPK14	MAPK14	Definite	MAPK14	VANDETANIB		DTC
MAPK14	MAPK14	Definite	MAPK14	KERACYANIN		DTC	17360708
MAPK14	MAPK14	Definite	MAPK14	METHOXSALEN		NCI	15711930
MAPK14	MAPK14	Definite	MAPK14	DIHYDROTANSHINONE I		DTC	26339922
MAPK14	MAPK14	Definite	MAPK14	AST-487		DTC
MAPK14	MAPK14	Definite	MAPK14	2-METHOXYESTRADIOL		NCI	17012370
MAPK14	MAPK14	Definite	MAPK14	MILTIRONE		DTC	26339922
MAPK14	MAPK14	Definite	MAPK14	XANTHOHUMOL		DTC	22111577
MAPK14	MAPK14	Definite	MAPK14	SB-202190		DTC	22951114
MAPK14	MAPK14	Definite	MAPK14	PD-0166285		DTC
MAPK14	MAPK14	Definite	MAPK14	ALDESLEUKIN		NCI	10201984
MAPK14	MAPK14	Definite	MAPK14	HALOPERIDOL		NCI	11080184
MAPK14	MAPK14	Definite	MAPK14	SB-203580		DTC	25692815|19301816|17659871
MAPK14	MAPK14	Definite	MAPK14	DOXORUBICIN		NCI	16905201|15557793
MAPK14	MAPK14	Definite	MAPK14	SORAFENIB		DTC|PharmGKB	20124951
MAPK14	MAPK14	Definite	MAPK14	PIRFENIDONE		TdgClinicalTrial
MAPK14	MAPK14	Definite	MAPK14	LITHIUM		NCI	12558976
MAPK14	MAPK14	Definite	MAPK14	DASATINIB		DTC	18180381
MAPK14	MAPK14	Definite	MAPK14	GEFITINIB		DTC
MAPK14	MAPK14	Definite	MAPK14	OPHIOBOLIN O		DTC	22130129
MAPK14	MAPK14	Definite	MAPK14	RESVERATROL		NCI	16525036
MAPK14	MAPK14	Definite	MAPK14	EPOETIN BETA		NCI	10590051
ARNT	ARNT	Definite	ARNT	FUROSPONGOLIDE		DTC	18989978
ARNT	ARNT	Definite	ARNT	EPICATECHIN GALLATE		DTC	15620252
ARNT	ARNT	Definite	ARNT	HYDROCORTISONE		NCI	10048155
JUN	JUN	Definite	JUN	CLOTRIMAZOLE		DTC	16680159
JUN	JUN	Definite	JUN	CHEMBL275260		DTC
JUN	JUN	Definite	JUN	VINORELBINE TARTRATE		DTC
JUN	JUN	Definite	JUN	COLCHICINE		DTC
JUN	JUN	Definite	JUN	SERGEOLIDE		DTC	19199792
JUN	JUN	Definite	JUN	ROTENONE		DTC	16680159
JUN	JUN	Definite	JUN	SANGIVAMYCIN		DTC	17371872
JUN	JUN	Definite	JUN	AZELASTINE HYDROCHLORIDE		DTC
JUN	JUN	Definite	JUN	NEOCHAMAEJASMIN A		DTC	18380477
JUN	JUN	Definite	JUN	BUTINOLINE		DTC
JUN	JUN	Definite	JUN	CARBOXYMETHYL-TRIMETHYL-ARSONIUM		DTC
JUN	JUN	Definite	JUN	FENOFIBRATE		DTC	16680159
JUN	JUN	Definite	JUN	MECHLORETHAMINE HYDROCHLORIDE		DTC
JUN	JUN	Definite	JUN	CUPRIC CHLORIDE		DTC
JUN	JUN	Definite	JUN	CIPROFIBRATE		DTC	16680159
JUN	JUN	Definite	JUN	BRUCEANTIN		DTC	19199792
JUN	JUN	Definite	JUN	METHIMAZOLE		DTC
JUN	JUN	Definite	JUN	CRIDANIMOD		DTC
JUN	JUN	Definite	JUN	PATULIN		DTC	16680159
JUN	JUN	Definite	JUN	LIPOIC ACID, ALPHA		DTC
JUN	JUN	Definite	JUN	ATOMOXETINE HYDROCHLORIDE		DTC
JUN	JUN	Definite	JUN	SERTRALINE		DTC	16680159
JUN	JUN	Definite	JUN	(-)-CAMPHOR		DTC
JUN	JUN	Definite	JUN	BUPROPION HYDROCHLORIDE		DTC
JUN	JUN	Definite	JUN	BENZENETHIOL		DTC
JUN	JUN	Definite	JUN	CINNARIZINE		DTC	16680159
JUN	JUN	Definite	JUN	NAFRONYL OXALATE		DTC
JUN	JUN	Definite	JUN	BENZO[B]FLUORANTHENE		DTC
JUN	JUN	Definite	JUN	2-MERCAPTOPYRIMIDINE		DTC
JUN	JUN	Definite	JUN	ANTHRACENE-9-CARBOXYLIC ACID		DTC
JUN	JUN	Definite	JUN	AMINEPTINE		DTC
JUN	JUN	Definite	JUN	QUINAPRIL HYDROCHLORIDE		DTC
JUN	JUN	Definite	JUN	ISOLIQUIRITIGENIN		DTC	21866899
JUN	JUN	Definite	JUN	CHEMBL477052		DTC	21504179
JUN	JUN	Definite	JUN	SODIUM SELENITE		DTC
JUN	JUN	Definite	JUN	TROPISETRON		DTC
JUN	JUN	Definite	JUN	VINBLASTINE SULFATE		DTC
JUN	JUN	Definite	JUN	TRIFLUPROMAZINE HYDROCHLORIDE		DTC
JUN	JUN	Definite	JUN	DIPHENHYDRAMINE HYDROCHLORIDE		DTC
JUN	JUN	Definite	JUN	IRISOLIDONE		DTC	17996449
JUN	JUN	Definite	JUN	CLOFIBRATE		DTC	16680159
JUN	JUN	Definite	JUN	RETINYLRETINOATE		DTC	18511283
JUN	JUN	Definite	JUN	GEMFIBROZIL		DTC	16680159
JUN	JUN	Definite	JUN	HOLACANTHONE		DTC	19199792
GLI1	GLI1	Definite	GLI1	CHEMBL1934585		DTC	26169123
GLI1	GLI1	Definite	GLI1	BETULINIC ACID		DTC	18842418
GLI1	GLI1	Definite	GLI1	CHEMBL471694		DTC	26178912
GLI1	GLI1	Definite	GLI1	WITHAFERIN A		DTC	26169123
GLI1	GLI1	Definite	GLI1	CHEMBL512307		DTC	26178912
GLI1	GLI1	Definite	GLI1	COLUBRINIC ACID		DTC	18842418
PLG	PLG	Definite	PLG	UROKINASE	activator	TdgClinicalTrial|ChemblInteractions|TEND	12720300|12658774|12745435|11752352|12719778|12666133
PLG	PLG	Definite	PLG	APROTININ	inhibitor	ChemblInteractions	15277296
PLG	PLG	Definite	PLG	RETEPLASE	activator	TdgClinicalTrial|ChemblInteractions|TEND|TTD	11752352|19436656|18673235|17963464
PLG	PLG	Definite	PLG	STREPTOKINASE	activator	TdgClinicalTrial|ChemblInteractions|TEND|TTD	10581996|10664583|10726310|11752352|10631997|10569766
PLG	PLG	Definite	PLG	ALTEPLASE	activator	TdgClinicalTrial|ChemblInteractions|NCI|TEND|TTD	12033920|11752352|19436656|18673235|17963464
PLG	PLG	Definite	PLG	ANISTREPLASE	activator	TdgClinicalTrial|TEND|TTD	11752352|19436656|18673235|17963464
PLG	PLG	Definite	PLG	TENECTEPLASE	activator	TdgClinicalTrial|ChemblInteractions|TEND|TTD	11752352|19436656|18673235|17963464
PLG	PLG	Definite	PLG	AMINOCAPROIC ACID	inhibitor	ChemblInteractions
PLG	PLG	Definite	PLG	DESMOTEPLASE	activator	TdgClinicalTrial|ChemblInteractions|TTD	17425487
PLG	PLG	Definite	PLG	TRANEXAMIC ACID	inhibitor	ChemblInteractions
PLG	PLG	Definite	PLG	DEFIBROTIDE SODIUM	activator	ChemblInteractions
PLG	PLG	Definite	PLG	RANOLAZINE		TTD
PLG	PLG	Definite	PLG	OXYMETHOLONE		NCI	3238652
PLG	PLG	Definite	PLG	HUMAN GROWTH HORMONE		NCI	15760670|2143511
PLG	PLG	Definite	PLG	COUMARIN		NCI	3160707
PLG	PLG	Definite	PLG	PREDNISOLONE		NCI	2079995
PLG	PLG	Definite	PLG	GARLIC		NCI	17213677
PLG	PLG	Definite	PLG	NYSTATIN		NCI	7721938
PLG	PLG	Definite	PLG	AMEDIPLASE		TdgClinicalTrial
PLG	PLG	Definite	PLG	FIBRINOLYSIN, HUMAN		TdgClinicalTrial
PLG	PLG	Definite	PLG	BORTEZOMIB		DTC	20875739
PLG	PLG	Definite	PLG	LEPIRUDIN		NCI	15894352
PLG	PLG	Definite	PLG	INOSITOL		NCI	1648562
PLG	PLG	Definite	PLG	CHEMBL35482		NCI	15613028
PLG	PLG	Definite	PLG	NORETHINDRONE		NCI	1442974
PLG	PLG	Definite	PLG	DANAZOL		NCI	8529771|3146615|7607583
PLG	PLG	Definite	PLG	GENISTEIN		NCI	11835393
PLG	PLG	Definite	PLG	MELAGATRAN		TTD
PLG	PLG	Definite	PLG	RADIOSUMIN B		DTC	11374973
IKBKE	IKBKE	Definite	IKBKE	GEFITINIB		PharmGKB	31664190
IKBKE	IKBKE	Definite	IKBKE	CHEMBL379975		DTC
IKBKE	IKBKE	Definite	IKBKE	ADAVOSERTIB		DTC
IKBKE	IKBKE	Definite	IKBKE	TAE-684		DTC
IKBKE	IKBKE	Definite	IKBKE	R-406		DTC
IKBKE	IKBKE	Definite	IKBKE	DOVITINIB		DTC
IKBKE	IKBKE	Definite	IKBKE	CYC-116		DTC
IKBKE	IKBKE	Definite	IKBKE	PD-0166285		DTC
IKBKE	IKBKE	Definite	IKBKE	CHEMBL1997335		DTC
IKBKE	IKBKE	Definite	IKBKE	CENISERTIB		DTC
IKBKE	IKBKE	Definite	IKBKE	ILORASERTIB		DTC
SP1	SP1	Definite	SP1	METFORMIN		PharmGKB	24853734|29352482
SP1	SP1	Definite	SP1	TERAMEPROCOL		TTD
PGR	PGR	Definite	PGR	PROGESTERONE	agonist	DTC|TdgClinicalTrial|ChemblInteractions|TEND|TTD	17109827|9506743|21315613|17138644|17013809|17015480|17169175|30013421
PGR	PGR	Definite	PGR	DROSPIRENONE	agonist	TdgClinicalTrial|ChemblInteractions|TEND	7625729|8922878|16291771|17000933|16157482|15493951|11024226
PGR	PGR	Definite	PGR	LEVONORGESTREL	binder|agonist|modulator	TdgClinicalTrial|ChemblInteractions|TEND|TTD	17484506|17531625|17077229|16157482|11752352|16084894
PGR	PGR	Definite	PGR	ULIPRISTAL	modulator	TdgClinicalTrial|ChemblInteractions|TEND|TTD	23437846
PGR	PGR	Definite	PGR	MEDROXYPROGESTERONE ACETATE	agonist	ChemblInteractions|NCI|TTD	12846422
PGR	PGR	Definite	PGR	NORGESTIMATE	agonist	TdgClinicalTrial|ChemblInteractions|TEND|TTD	17107221|1324557|11752352|7750291|8384965
PGR	PGR	Definite	PGR	TELAPRISTONE ACETATE	modulator	ChemblInteractions
PGR	PGR	Definite	PGR	NORETHINDRONE	agonist	TdgClinicalTrial|ChemblInteractions|TEND|TTD	15063480|15261304|10494488|15189034|7711211|11752352|16084894
PGR	PGR	Definite	PGR	ETONOGESTREL	agonist	TdgClinicalTrial|ChemblInteractions|TEND|TTD	15063480|11041225|11752352|10601100
PGR	PGR	Definite	PGR	MEGESTROL ACETATE	agonist	ChemblInteractions
PGR	PGR	Definite	PGR	ETHYNODIOL DIACETATE	agonist	ChemblInteractions	166800|858280|11752352
PGR	PGR	Definite	PGR	ONAPRISTONE	antagonist	ChemblInteractions|TTD
PGR	PGR	Definite	PGR	MIFEPRISTONE	antagonist|agonist	TdgClinicalTrial|ChemblInteractions|TEND	10699595|10682471|10374120|10806733|11783365|11752352
PGR	PGR	Definite	PGR	ULIPRISTAL ACETATE	modulator	ChemblInteractions
PGR	PGR	Definite	PGR	NORELGESTROMIN	agonist	TdgClinicalTrial|ChemblInteractions	17107221|1324557|19962254|7750291|8384965
PGR	PGR	Definite	PGR	DESOGESTREL	agonist	TdgClinicalTrial|ChemblInteractions|TEND|TTD	6645495|3139361|11041225|11752352|7750284|10601100
PGR	PGR	Definite	PGR	HYDROXYPROGESTERONE CAPROATE	agonist	ChemblInteractions
PGR	PGR	Definite	PGR	DYDROGESTERONE	agonist	TdgClinicalTrial|ChemblInteractions|TEND|TTD	6827166|436795|11752352|16045524|8486204|15128769
PGR	PGR	Definite	PGR	LONAPRISAN	antagonist	ChemblInteractions
PGR	PGR	Definite	PGR	NORGESTREL	agonist|binder	TdgClinicalTrial|ChemblInteractions|TEND	11521119
PGR	PGR	Definite	PGR	NORETHINDRONE ACETATE	agonist	ChemblInteractions
PGR	PGR	Definite	PGR	PF-05019702	antagonist	ChemblInteractions
PGR	PGR	Definite	PGR	ASOPRISNIL	modulator|antagonist	ChemblInteractions	15857972|15714390
PGR	PGR	Definite	PGR	DANAZOL	agonist	ChemblInteractions	17636649|2404115|8000225|18061638
PGR	PGR	Definite	PGR	NORETHYNODREL	agonist	ChemblInteractions
PGR	PGR	Definite	PGR	DIENOGEST	agonist	TdgClinicalTrial	18061638
PGR	PGR	Definite	PGR	GESTODENE	activator|binder	TdgClinicalTrial	15697108
PGR	PGR	Definite	PGR	DOCETAXEL		PharmGKB|FDA
PGR	PGR	Definite	PGR	EXEMESTANE		PharmGKB|FDA
PGR	PGR	Definite	PGR	IXABEPILONE		PharmGKB|FDA
PGR	PGR	Definite	PGR	FULVESTRANT		PharmGKB|FDA
PGR	PGR	Definite	PGR	OLAPARIB		PharmGKB|FDA
PGR	PGR	Definite	PGR	CHEMBL2059711		DTC	24915879
PGR	PGR	Definite	PGR	ANASTROZOLE		ClearityFoundationBiomarkers|PharmGKB|FDA
PGR	PGR	Definite	PGR	LETROZOLE		ClearityFoundationBiomarkers|PharmGKB|FDA
PGR	PGR	Definite	PGR	TOREMIFENE		NCI	2147123
PGR	PGR	Definite	PGR	GOSERELIN		PharmGKB|FDA
PGR	PGR	Definite	PGR	LAPATINIB		PharmGKB|FDA
PGR	PGR	Definite	PGR	TOSAGESTIN		TTD
PGR	PGR	Definite	PGR	ERIBULIN		PharmGKB|FDA
PGR	PGR	Definite	PGR	PERTUZUMAB		PharmGKB|FDA
PGR	PGR	Definite	PGR	SIROLIMUS		NCI	1284044
PGR	PGR	Definite	PGR	TAMOXIFEN		ClearityFoundationBiomarkers|NCI|PharmGKB|FDA	3793272
PGR	PGR	Definite	PGR	ABEMACICLIB		PharmGKB
PGR	PGR	Definite	PGR	PALBOCICLIB		PharmGKB
PGR	PGR	Definite	PGR	TRASTUZUMAB		PharmGKB|FDA
PGR	PGR	Definite	PGR	PROGESTOGEN		TdgClinicalTrial
PGR	PGR	Definite	PGR	RIBOCICLIB		PharmGKB|FDA
PGR	PGR	Definite	PGR	NERATINIB		PharmGKB|FDA
PGR	PGR	Definite	PGR	MEGESTROL		TdgClinicalTrial|TEND|TTD
PGR	PGR	Definite	PGR	VILAPRISAN		TTD
SMARCA4	SMARCA4	Definite	SMARCA4	VINORELBINE		CIViC	26671993
SMARCA4	SMARCA4	Definite	SMARCA4	RIBOCICLIB		CIViC	30718512
SMARCA4	SMARCA4	Definite	SMARCA4	PALBOCICLIB		CIViC	30718512|30718506
SMARCA4	SMARCA4	Definite	SMARCA4	TAZEMETOSTAT		CIViC	29650362
SMARCA4	SMARCA4	Definite	SMARCA4	CISPLATIN		CIViC	26671993
SMARCA4	SMARCA4	Definite	SMARCA4	ABEMACICLIB		CIViC	30718512|30718506
SMARCA4	SMARCA4	Definite	SMARCA4	TOZASERTIB		CIViC	28102363
CG	CTSG	Definite	CTSG	CHEMBL374027		TTD
CG	CTSG	Definite	CTSG	MANNITOL		NCI	3142269
MAP2K1	MAP2K1	Definite	MAP2K1	SELUMETINIB	allosteric modulator|inhibitor	TALC|MyCancerGenome|ClearityFoundationClinicalTrial|JAX-CKB|ChemblInteractions|COSMIC|CIViC|CancerCommons|MyCancerGenomeClinicalTrial|TTD	22197931|26324360|17332304|22327936|25394791|28029918|18632602|19915144|26582713|17699718|23444215|24448821|27312529
MAP2K1	MAP2K1	Definite	MAP2K1	COBIMETINIB	inhibitor|allosteric modulator	TALC|MyCancerGenome|TdgClinicalTrial|ClearityFoundationClinicalTrial|JAX-CKB|ChemblInteractions|CancerCommons|MyCancerGenomeClinicalTrial|OncoKB	26566875|26384788
MAP2K1	MAP2K1	Definite	MAP2K1	PIMASERTIB	inhibitor	TALC|MyCancerGenome|ClearityFoundationClinicalTrial|ChemblInteractions
MAP2K1	MAP2K1	Definite	MAP2K1	BALAMAPIMOD	inhibitor	ChemblInteractions
MAP2K1	MAP2K1	Definite	MAP2K1	TRAMETINIB	inhibitor|antagonist	TALC|MyCancerGenome|TdgClinicalTrial|ClearityFoundationClinicalTrial|JAX-CKB|CIViC|MyCancerGenomeClinicalTrial|OncoKB	25370473|26644315|24265153|25673644|26566875|26582713|22389471|25899310|27312529|24982505|28179366|23432625|24265154
MAP2K1	MAP2K1	Definite	MAP2K1	CI-1040	inhibitor|allosteric modulator	MyCancerGenome|JAX-CKB|ChemblInteractions	12370306|19915144
MAP2K1	MAP2K1	Definite	MAP2K1	BINIMETINIB	inhibitor|allosteric modulator	MyCancerGenome|TdgClinicalTrial|ClearityFoundationClinicalTrial|ChemblInteractions|CIViC|MyCancerGenomeClinicalTrial	31227518
MAP2K1	MAP2K1	Definite	MAP2K1	TRAMETINIB DIMETHYL SULFOXIDE	inhibitor	ChemblInteractions
MAP2K1	MAP2K1	Definite	MAP2K1	PIMASERTIB HYDROCHLORIDE	inhibitor	CancerCommons
MAP2K1	MAP2K1	Definite	MAP2K1	TAK-733	inhibitor|allosteric modulator	MyCancerGenome|ClearityFoundationClinicalTrial|ChemblInteractions|CancerCommons
MAP2K1	MAP2K1	Definite	MAP2K1	REFAMETINIB	allosteric modulator|inhibitor	MyCancerGenome|JAX-CKB|ChemblInteractions|CancerCommons	26582713
MAP2K1	MAP2K1	Definite	MAP2K1	RO-4987655	inhibitor	ChemblInteractions|CancerCommons
MAP2K1	MAP2K1	Definite	MAP2K1	RG-7304	inhibitor	DTC|ChemblInteractions	25766633
MAP2K1	MAP2K1	Definite	MAP2K1	E-6201	inhibitor	JAX-CKB|ChemblInteractions	24448821
MAP2K1	MAP2K1	Definite	MAP2K1	PD-0325901	inhibitor	DTC|MyCancerGenome|JAX-CKB|ChemblInteractions	23398453|26267534|25766633|26582713|10592235
MAP2K1	MAP2K1	Definite	MAP2K1	RG-7167	inhibitor	ChemblInteractions
MAP2K1	MAP2K1	Definite	MAP2K1	RG-7420	inhibitor	MyCancerGenome|ChemblInteractions
MAP2K1	MAP2K1	Definite	MAP2K1	COBIMETINIB FUMARATE	inhibitor	ChemblInteractions
MAP2K1	MAP2K1	Definite	MAP2K1	AS-703988	inhibitor	ChemblInteractions
MAP2K1	MAP2K1	Definite	MAP2K1	WX-554	inhibitor	TdgClinicalTrial|ChemblInteractions
MAP2K1	MAP2K1	Definite	MAP2K1	MEKINIST	inhibitor	CancerCommons
MAP2K1	MAP2K1	Definite	MAP2K1	AZD-8330	inhibitor	TdgClinicalTrial|ChemblInteractions
MAP2K1	MAP2K1	Definite	MAP2K1	VEMURAFENIB		JAX-CKB|DoCM|CIViC	22197931|24265153|21383288|7651428|18632602|19915144|23569304|22389471|25157968|24448821|27312529
MAP2K1	MAP2K1	Definite	MAP2K1	ARRY-300		TdgClinicalTrial
MAP2K1	MAP2K1	Definite	MAP2K1	CENISERTIB		DTC
MAP2K1	MAP2K1	Definite	MAP2K1	CERITINIB		JAX-CKB	25394791
MAP2K1	MAP2K1	Definite	MAP2K1	STAUROSPORINE		DTC
MAP2K1	MAP2K1	Definite	MAP2K1	JNJ-7706621		DTC
MAP2K1	MAP2K1	Definite	MAP2K1	CETUXIMAB		JAX-CKB|CIViC	26644315|27312529|28179366
MAP2K1	MAP2K1	Definite	MAP2K1	SOTRASTAURIN		DTC
MAP2K1	MAP2K1	Definite	MAP2K1	ALPELISIB		JAX-CKB	27312529
MAP2K1	MAP2K1	Definite	MAP2K1	VANDETANIB		DTC
MAP2K1	MAP2K1	Definite	MAP2K1	DOVITINIB		DTC
MAP2K1	MAP2K1	Definite	MAP2K1	PANITUMUMAB		JAX-CKB|CIViC	26644315|31227518
MAP2K1	MAP2K1	Definite	MAP2K1	CHEMBL379975		DTC
MAP2K1	MAP2K1	Definite	MAP2K1	CHEMBL1956073		DTC	20053779
MAP2K1	MAP2K1	Definite	MAP2K1	TOZASERTIB		DTC
MAP2K1	MAP2K1	Definite	MAP2K1	OMIPALISIB		JAX-CKB	22389471
MAP2K1	MAP2K1	Definite	MAP2K1	CHEMBL546797		DTC
MAP2K1	MAP2K1	Definite	MAP2K1	PD-0166285		DTC
MAP2K1	MAP2K1	Definite	MAP2K1	DABRAFENIB		JAX-CKB|CIViC	25370473|24265153|25673644|22389471|27312529|24463458|24265154
MAP2K1	MAP2K1	Definite	MAP2K1	DASATINIB		DTC
MAP2K1	MAP2K1	Definite	MAP2K1	RG-1530		DTC
MAP2K1	MAP2K1	Definite	MAP2K1	PLX-4720		JAX-CKB	21383288|19915144
MAP2K1	MAP2K1	Definite	MAP2K1	CHEMBL202721		DTC
MAP2K1	MAP2K1	Definite	MAP2K1	TAE-684		DTC
MAP2K1	MAP2K1	Definite	MAP2K1	ILORASERTIB		DTC
MAP2K1	MAP2K1	Definite	MAP2K1	DEL-22379		JAX-CKB	26267534
MAP2K1	MAP2K1	Definite	MAP2K1	CHEMBL406845		DTC
MAP2K1	MAP2K1	Definite	MAP2K1	ENCORAFENIB		JAX-CKB	27312529
MAP2K2	MAP2K2	Definite	MAP2K2	REFAMETINIB	inhibitor|allosteric modulator	MyCancerGenome|ChemblInteractions
MAP2K2	MAP2K2	Definite	MAP2K2	SELUMETINIB	inhibitor	TALC|MyCancerGenome|ClearityFoundationClinicalTrial|ChemblInteractions|MyCancerGenomeClinicalTrial|TTD	17332304|28029918|17699718
MAP2K2	MAP2K2	Definite	MAP2K2	AS-703988	inhibitor	ChemblInteractions
MAP2K2	MAP2K2	Definite	MAP2K2	COBIMETINIB	inhibitor|allosteric modulator	MyCancerGenome|ClearityFoundationClinicalTrial|ChemblInteractions|MyCancerGenomeClinicalTrial|OncoKB
MAP2K2	MAP2K2	Definite	MAP2K2	RG-7304	inhibitor	ChemblInteractions
MAP2K2	MAP2K2	Definite	MAP2K2	PIMASERTIB	inhibitor	TALC|MyCancerGenome|ClearityFoundationClinicalTrial|ChemblInteractions
MAP2K2	MAP2K2	Definite	MAP2K2	TAK-733	inhibitor	MyCancerGenome|ClearityFoundationClinicalTrial|ChemblInteractions
MAP2K2	MAP2K2	Definite	MAP2K2	BINIMETINIB	inhibitor|allosteric modulator	MyCancerGenome|TdgClinicalTrial|ClearityFoundationClinicalTrial|ChemblInteractions|MyCancerGenomeClinicalTrial	28587477
MAP2K2	MAP2K2	Definite	MAP2K2	TRAMETINIB DIMETHYL SULFOXIDE	inhibitor	ChemblInteractions
MAP2K2	MAP2K2	Definite	MAP2K2	TRAMETINIB	inhibitor|antagonist	TALC|MyCancerGenome|ClearityFoundationClinicalTrial|CIViC|MyCancerGenomeClinicalTrial	25452114|23432625
MAP2K2	MAP2K2	Definite	MAP2K2	CI-1040	inhibitor	MyCancerGenome|ChemblInteractions
MAP2K2	MAP2K2	Definite	MAP2K2	AZD-8330	inhibitor	ChemblInteractions
MAP2K2	MAP2K2	Definite	MAP2K2	BALAMAPIMOD	inhibitor	ChemblInteractions
MAP2K2	MAP2K2	Definite	MAP2K2	PD-0325901	inhibitor	DTC|MyCancerGenome|ChemblInteractions	23398453
MAP2K2	MAP2K2	Definite	MAP2K2	RG-7420	inhibitor	MyCancerGenome
MAP2K2	MAP2K2	Definite	MAP2K2	RG-7167	inhibitor	ChemblInteractions
MAP2K2	MAP2K2	Definite	MAP2K2	RO-4987655	inhibitor	ChemblInteractions
MAP2K2	MAP2K2	Definite	MAP2K2	COBIMETINIB FUMARATE	inhibitor	ChemblInteractions
MAP2K2	MAP2K2	Definite	MAP2K2	WX-554	inhibitor	TdgClinicalTrial|ChemblInteractions
MAP2K2	MAP2K2	Definite	MAP2K2	CHEMBL406845		DTC
MAP2K2	MAP2K2	Definite	MAP2K2	VEMURAFENIB		CIViC	24265153
MAP2K2	MAP2K2	Definite	MAP2K2	CEDIRANIB		DTC
MAP2K2	MAP2K2	Definite	MAP2K2	TAE-684		DTC
MAP2K2	MAP2K2	Definite	MAP2K2	DABRAFENIB		CIViC	24265153|25452114
MAP2K2	MAP2K2	Definite	MAP2K2	PD-0166285		DTC
MAP2K2	MAP2K2	Definite	MAP2K2	CHEMBL379975		DTC
MAP2K2	MAP2K2	Definite	MAP2K2	CHEMBL546797		DTC
MAP2K2	MAP2K2	Definite	MAP2K2	LINIFANIB		DTC
MAP2K2	MAP2K2	Definite	MAP2K2	DASATINIB		DTC
MAP2K2	MAP2K2	Definite	MAP2K2	DOVITINIB		DTC
MAP2K2	MAP2K2	Definite	MAP2K2	CHEMBL1956073		DTC	20053779
MAP2K2	MAP2K2	Definite	MAP2K2	JNJ-7706621		DTC
MAP2K2	MAP2K2	Definite	MAP2K2	PF-00562271		DTC
MAP2K2	MAP2K2	Definite	MAP2K2	CHEMBL202721		DTC
MAP2K2	MAP2K2	Definite	MAP2K2	ILORASERTIB		DTC
MAP2K2	MAP2K2	Definite	MAP2K2	RG-1530		DTC
MAP2K2	MAP2K2	Definite	MAP2K2	CENISERTIB		DTC
MAP2K2	MAP2K2	Definite	MAP2K2	ARRY-300		TdgClinicalTrial
MAP2K2	MAP2K2	Definite	MAP2K2	TOZASERTIB		DTC
MAP2K2	MAP2K2	Definite	MAP2K2	VANDETANIB		DTC
MYC	MYC	Definite	MYC	BIZELESIN		NCI	10933811
MYC	MYC	Definite	MYC	AMG-900		ClearityFoundationBiomarkers
MYC	MYC	Definite	MYC	THYROTROPIN		NCI	3125035|3726540
MYC	MYC	Definite	MYC	DINACICLIB		ClearityFoundationBiomarkers
MYC	MYC	Definite	MYC	MELATONIN		NCI	7629697
MYC	MYC	Definite	MYC	VERAPAMIL		NCI	1511424
MYC	MYC	Definite	MYC	AMINOPTERIN		NCI	11410244
MYC	MYC	Definite	MYC	THROMBIN		NCI	3023371
MYC	MYC	Definite	MYC	IMATINIB		NCI	15517875
MYC	MYC	Definite	MYC	CALCITRIOL		NCI	8490200|15598784
MYC	MYC	Definite	MYC	ACIVICIN		NCI	1596574|1997162
MYC	MYC	Definite	MYC	QUINAPRIL		NCI	9370386
MYC	MYC	Definite	MYC	SULINDAC		NCI	12414619
MYC	MYC	Definite	MYC	LITHIUM		NCI	15286700
MYC	MYC	Definite	MYC	PROTOPORPHYRIN		NCI	9868803
MYC	MYC	Definite	MYC	NOVOBIOCIN		NCI	3528175
MYC	MYC	Definite	MYC	MITOGUAZONE		NCI	3528175
MYC	MYC	Definite	MYC	VORINOSTAT		NCI	15583844
MYC	MYC	Definite	MYC	ESTRONE		NCI	12520970|12567859
MYC	MYC	Definite	MYC	TROGLITAZONE		NCI	11344222
MYC	MYC	Definite	MYC	DIETHYLSTILBESTROL		NCI	15545218
MYC	MYC	Definite	MYC	ANTIBIOTIC		NCI	2654492
MYC	MYC	Definite	MYC	AZACITIDINE		NCI	9006118
MYC	MYC	Definite	MYC	CHEMBL35482		NCI	11196459
MYC	MYC	Definite	MYC	METHYLPREDNISOLONE		NCI	9169090
MYC	MYC	Definite	MYC	OLAPARIB		CIViC	28490518
MYC	MYC	Definite	MYC	GLUTAMINE		NCI	16898871
MYC	MYC	Definite	MYC	CETUXIMAB		NCI	3085922
MYC	MYC	Definite	MYC	LOBAPLATIN		NCI	11116285
MYC	MYC	Definite	MYC	AN-9		NCI	8348968
MYC	MYC	Definite	MYC	THIOGUANINE		NCI	1988936
MYC	MYC	Definite	MYC	INDOMETHACIN		NCI	10403534
MYC	MYC	Definite	MYC	HYPOXANTHINE		NCI	3528863
MYC	MYC	Definite	MYC	PREXASERTIB		CIViC	28490518
MYC	MYC	Definite	MYC	ALISERTIB		ClearityFoundationBiomarkers
MYC	MYC	Definite	MYC	AMIFOSTINE		NCI	9450496
MYC	MYC	Definite	MYC	BROMOCRIPTINE		NCI	11680511
MYC	MYC	Definite	MYC	IBRUTINIB		CIViC	28830912
MYC	MYC	Definite	MYC	CISPLATIN		CIViC	28490518
MYC	MYC	Definite	MYC	ADOZELESIN		NCI	10933811
PI3K	PIK3CA	Ambiguous	PIK3CA	CHEMBL1379243		DTC	22212721
PI3K	PIK3CA	Ambiguous	PIK3CA	GDC-0077	inhibitor	OncoKB
PI3K	PIK3CA	Ambiguous	PIK3CA	EVEROLIMUS		ClearityFoundationBiomarkers|JAX-CKB|CIViC	26951309|23629727|27797976|20664174|20664172|27893038|21358673|27091708|22662154
PI3K	PIK3CA	Ambiguous	PIK3CA	A-443654		JAX-CKB	24978597|19208828|24569089
PI3K	PIK3CA	Ambiguous	PIK3CA	ACALISIB	inhibitor	JAX-CKB
PI3K	PIK3CA	Ambiguous	PIK3CA	PANITUMUMAB		CIViC	19223544
PI3K	PIK3CA	Ambiguous	PIK3CA	TANESPIMYCIN		NCI	16267832
PI3K	PIK3CA	Ambiguous	PIK3CA	OMIPALISIB	inhibitor	ClearityFoundationBiomarkers|JAX-CKB|ChemblInteractions|MyCancerGenomeClinicalTrial	26603258
PI3K	PIK3CA	Ambiguous	PIK3CA	CC-223		JAX-CKB	24978597|25855786|26177599
PI3K	PIK3CA	Ambiguous	PIK3CA	IBUPROFEN		CIViC	30683736
PI3K	PIK3CA	Ambiguous	PIK3CA	RIGOSERTIB		TdgClinicalTrial|JAX-CKB	23873848|27104980
PI3K	PIK3CA	Ambiguous	PIK3CA	COPANLISIB	inhibitor	ClearityFoundationBiomarkers|MyCancerGenome|JAX-CKB|ChemblInteractions|CancerCommons|MyCancerGenomeClinicalTrial|OncoKB	27672108|24170767
PI3K	PIK3CA	Ambiguous	PIK3CA	SELUMETINIB		JAX-CKB	26272063|22271687|24939055|21358673|26232337|26137449
PI3K	PIK3CA	Ambiguous	PIK3CA	PALBOCICLIB		JAX-CKB|CIViC	27020857|25002028|26369631
PI3K	PIK3CA	Ambiguous	PIK3CA	VEMURAFENIB		JAX-CKB|CIViC	24265155|24265153|22180495|26137449
PI3K	PIK3CA	Ambiguous	PIK3CA	TASELISIB	inhibitor	MyCancerGenome|JAX-CKB|ChemblInteractions|CIViC|TTD|OncoKB	25172762|28331003|26333383|26589432|23662903
PI3K	PIK3CA	Ambiguous	PIK3CA	SURAMIN		NCI	15833899
PI3K	PIK3CA	Ambiguous	PIK3CA	VINCRISTINE		NCI	12874004
PI3K	PIK3CA	Ambiguous	PIK3CA	DEMCIZUMAB		JAX-CKB	26855149
PI3K	PIK3CA	Ambiguous	PIK3CA	CARBOPLATIN		JAX-CKB|NCI|PharmGKB	16275998|21216929
PI3K	PIK3CA	Ambiguous	PIK3CA	CHEMBL1939433		DTC	22212721
PI3K	PIK3CA	Ambiguous	PIK3CA	GEDATOLISIB	inhibitor	ClearityFoundationBiomarkers|MyCancerGenome|JAX-CKB|ChemblInteractions|MyCancerGenomeClinicalTrial	24042735|25977343|24823695|17314276|25688157|21325073
PI3K	PIK3CA	Ambiguous	PIK3CA	APITOLISIB	inhibitor	MyCancerGenome|JAX-CKB|ChemblInteractions	26951309|26787751|21998291
PI3K	PIK3CA	Ambiguous	PIK3CA	SAR-260301	inhibitor	CancerCommons
PI3K	PIK3CA	Ambiguous	PIK3CA	COBIMETINIB		JAX-CKB	22084396
PI3K	PIK3CA	Ambiguous	PIK3CA	FIMEPINOSTAT	inhibitor	JAX-CKB|ChemblInteractions	22693356|20570890
PI3K	PIK3CA	Ambiguous	PIK3CA	PUQUITINIB	inhibitor	ChemblInteractions
PI3K	PIK3CA	Ambiguous	PIK3CA	LAPATINIB		JAX-CKB|CIViC|PharmGKB	19010894|26270481|25199759|26627007|23940356|26245675|22294718|26920887
PI3K	PIK3CA	Ambiguous	PIK3CA	ABT 737		JAX-CKB	27974663
PI3K	PIK3CA	Ambiguous	PIK3CA	TRAMETINIB		JAX-CKB	27659046|27797976|26882569|26469692|26627007|26369631
PI3K	PIK3CA	Ambiguous	PIK3CA	CABOZANTINIB		CIViC	25242168
PI3K	PIK3CA	Ambiguous	PIK3CA	NAVITOCLAX		JAX-CKB	27659046|27197306
PI3K	PIK3CA	Ambiguous	PIK3CA	REGRAMOSTIM		NCI	15107457
PI3K	PIK3CA	Ambiguous	PIK3CA	CETUXIMAB		JAX-CKB|CIViC	26715098|25714871|28446642|25724520|25838391|19603024|20619739|19223544|28424201|27002107
PI3K	PIK3CA	Ambiguous	PIK3CA	SONOLISIB	inhibitor	MyCancerGenome|JAX-CKB|ChemblInteractions|CancerCommons|MyCancerGenomeClinicalTrial	22693357
PI3K	PIK3CA	Ambiguous	PIK3CA	MSC-2363318A		JAX-CKB	27186432
PI3K	PIK3CA	Ambiguous	PIK3CA	DEGUELIN		JAX-CKB	24978597|20811676
PI3K	PIK3CA	Ambiguous	PIK3CA	OPRELVEKIN		NCI	8641341
PI3K	PIK3CA	Ambiguous	PIK3CA	MK-2206		JAX-CKB	26187616|26627007|26084990|21289267|22932669
PI3K	PIK3CA	Ambiguous	PIK3CA	INK-1117	inhibitor	MyCancerGenome|ChemblInteractions|TTD
PI3K	PIK3CA	Ambiguous	PIK3CA	CAPIVASERTIB		JAX-CKB|CIViC	26116361|19755509|24088382|22294718|28489509
PI3K	PIK3CA	Ambiguous	PIK3CA	SAMOTOLISIB	inhibitor	JAX-CKB|ChemblInteractions|TTD	27439478
PI3K	PIK3CA	Ambiguous	PIK3CA	CHEMBL589258		JAX-CKB	20371716
PI3K	PIK3CA	Ambiguous	PIK3CA	PI-103	inhibitor	MyCancerGenome|JAX-CKB	22336586
PI3K	PIK3CA	Ambiguous	PIK3CA	GSK-1059615	inhibitor	JAX-CKB|ChemblInteractions
PI3K	PIK3CA	Ambiguous	PIK3CA	EMODIN		DTC	22212721
PI3K	PIK3CA	Ambiguous	PIK3CA	PILARALISIB	inhibitor	ClearityFoundationBiomarkers|MyCancerGenome|JAX-CKB|ChemblInteractions	24166903|25637314|21216929
PI3K	PIK3CA	Ambiguous	PIK3CA	OSI-027		JAX-CKB	21673091
PI3K	PIK3CA	Ambiguous	PIK3CA	AT-13148		JAX-CKB	22781553
PI3K	PIK3CA	Ambiguous	PIK3CA	ALPELISIB	inhibitor	ClearityFoundationBiomarkers|MyCancerGenome|JAX-CKB|ChemblInteractions|CIViC|CancerCommons|MyCancerGenomeClinicalTrial|PharmGKB|TTD|FDA|OncoKB	27974663|28852212|27602501|31091374|27126994|26627007|24608574|27451907|26013318|27604488|28119489|29109464
PI3K	PIK3CA	Ambiguous	PIK3CA	FULVESTRANT		JAX-CKB|CIViC|OncoKB	27174596|31091374
PI3K	PIK3CA	Ambiguous	PIK3CA	VS-5584	inhibitor	JAX-CKB|ChemblInteractions	23270925
PI3K	PIK3CA	Ambiguous	PIK3CA	TAK-733		JAX-CKB	26439693
PI3K	PIK3CA	Ambiguous	PIK3CA	CISPLATIN		JAX-CKB|CIViC|PharmGKB	27489350
PI3K	PIK3CA	Ambiguous	PIK3CA	BORTEZOMIB		JAX-CKB	21216929
PI3K	PIK3CA	Ambiguous	PIK3CA	DS-7423	inhibitor	ClearityFoundationBiomarkers|JAX-CKB|ChemblInteractions	24504419
PI3K	PIK3CA	Ambiguous	PIK3CA	PWT-33579	inhibitor	ChemblInteractions
PI3K	PIK3CA	Ambiguous	PIK3CA	CAMPTOTHECIN		JAX-CKB|NCI	24042735|12464623|25688157
PI3K	PIK3CA	Ambiguous	PIK3CA	BCG VACCINE		NCI	14742634
PI3K	PIK3CA	Ambiguous	PIK3CA	PF-04691502	inhibitor	ClearityFoundationBiomarkers|MyCancerGenome|JAX-CKB|ChemblInteractions	21750219
PI3K	PIK3CA	Ambiguous	PIK3CA	PWT-33587	inhibitor	ChemblInteractions
PI3K	PIK3CA	Ambiguous	PIK3CA	PERIFOSINE		CIViC	19706758
PI3K	PIK3CA	Ambiguous	PIK3CA	IRINOTECAN		JAX-CKB	24042735|16707468|25714871|21325073
PI3K	PIK3CA	Ambiguous	PIK3CA	DOXIL		JAX-CKB	21216929
PI3K	PIK3CA	Ambiguous	PIK3CA	PKI-179	inhibitor	JAX-CKB|ChemblInteractions	20797855
PI3K	PIK3CA	Ambiguous	PIK3CA	WX-037	inhibitor	ChemblInteractions
PI3K	PIK3CA	Ambiguous	PIK3CA	PIMASERTIB		JAX-CKB	23629727
PI3K	PIK3CA	Ambiguous	PIK3CA	BEVACIZUMAB		JAX-CKB	27893038|23940356|21216929|25363205
PI3K	PIK3CA	Ambiguous	PIK3CA	BUPARLISIB	inhibitor	MyCancerGenome|JAX-CKB|ChemblInteractions|CancerCommons|TTD|OncoKB	26715098|26909613|22159814|27974663|24470511|23940356|28539475|26098748|26013318|28119489
PI3K	PIK3CA	Ambiguous	PIK3CA	TEMSIROLIMUS		ClearityFoundationBiomarkers|JAX-CKB|CIViC	27893038|22271473|22245973|19706758|25527417|21216929|21289267|27016228
PI3K	PIK3CA	Ambiguous	PIK3CA	STREPTOZOCIN		NCI	16130182
PI3K	PIK3CA	Ambiguous	PIK3CA	RG-7666	inhibitor	ChemblInteractions
PI3K	PIK3CA	Ambiguous	PIK3CA	SIROLIMUS		JAX-CKB|NCI|CIViC	15647370|15878982|26882569|28514312|19029981|17376864
PI3K	PIK3CA	Ambiguous	PIK3CA	MYRICETIN		DTC	22212721
PI3K	PIK3CA	Ambiguous	PIK3CA	GEFITINIB		CIViC	21258250
PI3K	PIK3CA	Ambiguous	PIK3CA	ALVOCIDIB		NCI	14767524
PI3K	PIK3CA	Ambiguous	PIK3CA	IRINOTECAN HYDROCHLORIDE		NCI	15809721
PI3K	PIK3CA	Ambiguous	PIK3CA	IDELALISIB	inhibitor	JAX-CKB|CIViC	26466009|26137449
PI3K	PIK3CA	Ambiguous	PIK3CA	ALDESLEUKIN		NCI	10229082
PI3K	PIK3CA	Ambiguous	PIK3CA	LUCITANIB		JAX-CKB	27126994
PI3K	PIK3CA	Ambiguous	PIK3CA	SULINDAC		NCI|CIViC	30683736|12654560
PI3K	PIK3CA	Ambiguous	PIK3CA	OLAPARIB		JAX-CKB	26909613
PI3K	PIK3CA	Ambiguous	PIK3CA	AEW-541		JAX-CKB	27196766
PI3K	PIK3CA	Ambiguous	PIK3CA	ERLOTINIB		CIViC	21258250
PI3K	PIK3CA	Ambiguous	PIK3CA	MIDOSTAURIN		NCI	11719451
PI3K	PIK3CA	Ambiguous	PIK3CA	SF-1126	inhibitor	ChemblInteractions
PI3K	PIK3CA	Ambiguous	PIK3CA	SERABELISIB	inhibitor	JAX-CKB|ChemblInteractions|TTD|OncoKB	28490463
PI3K	PIK3CA	Ambiguous	PIK3CA	ZSTK-474	inhibitor	ChemblInteractions
PI3K	PIK3CA	Ambiguous	PIK3CA	PACLITAXEL		JAX-CKB|NCI	26469692|24170767|12761490|26245675|21216929
PI3K	PIK3CA	Ambiguous	PIK3CA	RESVERATROL		NCI	15925284
PI3K	PIK3CA	Ambiguous	PIK3CA	QUERCETIN	inhibitor	DTC|MyCancerGenome|NCI	22212721|17045724
PI3K	PIK3CA	Ambiguous	PIK3CA	RIDAFOROLIMUS		JAX-CKB	26187616
PI3K	PIK3CA	Ambiguous	PIK3CA	CHEMBL1765740		JAX-CKB	27451907
PI3K	PIK3CA	Ambiguous	PIK3CA	TAMOXIFEN		JAX-CKB	26116361
PI3K	PIK3CA	Ambiguous	PIK3CA	MILTEFOSINE		NCI	16752184
PI3K	PIK3CA	Ambiguous	PIK3CA	VISTUSERTIB		JAX-CKB	27974663
PI3K	PIK3CA	Ambiguous	PIK3CA	FLUOROURACIL		JAX-CKB	25714871|22336586|28424201
PI3K	PIK3CA	Ambiguous	PIK3CA	GEMCITABINE		JAX-CKB	28750271
PI3K	PIK3CA	Ambiguous	PIK3CA	VENETOCLAX		JAX-CKB	27974663
PI3K	PIK3CA	Ambiguous	PIK3CA	CELECOXIB		CIViC	30683736
PI3K	PIK3CA	Ambiguous	PIK3CA	PA-799	inhibitor	JAX-CKB|ChemblInteractions|TTD	25231405|21558396
PI3K	PIK3CA	Ambiguous	PIK3CA	AFURESERTIB		JAX-CKB	24978597
PI3K	PIK3CA	Ambiguous	PIK3CA	LINSITINIB		JAX-CKB	27196766
PI3K	PIK3CA	Ambiguous	PIK3CA	INFIGRATINIB	inhibitor	MyCancerGenome|JAX-CKB	28119489
PI3K	PIK3CA	Ambiguous	PIK3CA	CHEMBL263664		JAX-CKB	21191045
PI3K	PIK3CA	Ambiguous	PIK3CA	AZD-8055		JAX-CKB	28446642|22271687
PI3K	PIK3CA	Ambiguous	PIK3CA	PONATINIB		JAX-CKB	26270481
PI3K	PIK3CA	Ambiguous	PIK3CA	DABRAFENIB		JAX-CKB	27797976
PI3K	PIK3CA	Ambiguous	PIK3CA	REGORAFENIB		JAX-CKB	23629727|25838391
PI3K	PIK3CA	Ambiguous	PIK3CA	RALOXIFENE		NCI	11901050
PI3K	PIK3CA	Ambiguous	PIK3CA	NERATINIB		JAX-CKB	26627007|26333383|26243863
PI3K	PIK3CA	Ambiguous	PIK3CA	PRASTERONE		NCI	15501480
PI3K	PIK3CA	Ambiguous	PIK3CA	VOXTALISIB	inhibitor	MyCancerGenome|JAX-CKB|ChemblInteractions|CancerCommons	24583798|24634413
PI3K	PIK3CA	Ambiguous	PIK3CA	BGT-226	inhibitor	ChemblInteractions
PI3K	PIK3CA	Ambiguous	PIK3CA	UPROSERTIB		JAX-CKB
PI3K	PIK3CA	Ambiguous	PIK3CA	FLOXURIDINE		JAX-CKB	25714871
PI3K	PIK3CA	Ambiguous	PIK3CA	GSK-2636771	inhibitor	MyCancerGenome
PI3K	PIK3CA	Ambiguous	PIK3CA	SORAFENIB		JAX-CKB	23629727|25363205
PI3K	PIK3CA	Ambiguous	PIK3CA	AZD-8835	inhibitor	JAX-CKB	26839307
PI3K	PIK3CA	Ambiguous	PIK3CA	DOXORUBICIN		JAX-CKB|NCI	16905201|27893038|12761490
PI3K	PIK3CA	Ambiguous	PIK3CA	LETROZOLE		JAX-CKB	27126994
PI3K	PIK3CA	Ambiguous	PIK3CA	LY-294002		DTC	17562705|22212721
PI3K	PIK3CA	Ambiguous	PIK3CA	PD-0325901		JAX-CKB	26272063|24339963|21325073
PI3K	PIK3CA	Ambiguous	PIK3CA	RIBOCICLIB		CIViC	25002028
PI3K	PIK3CA	Ambiguous	PIK3CA	PICTILISIB	inhibitor	DTC|MyCancerGenome|JAX-CKB|ChemblInteractions|CIViC	27489350|23674493|27174596|24601221|22084396|23360348|27020857|23888070|23136191|24339963|27197306|26058079|27604488|27196766|28119489
PI3K	PIK3CA	Ambiguous	PIK3CA	AZD-6482	inhibitor	JAX-CKB|ChemblInteractions
PI3K	PIK3CA	Ambiguous	PIK3CA	SAPANISERTIB	inhibitor	JAX-CKB	26272063|25261369|27974663|23085766
PI3K	PIK3CA	Ambiguous	PIK3CA	TRASTUZUMAB		JAX-CKB|CIViC|PharmGKB	17936563|21676217|21594665|24470511|19010894|25199759|26469692|28167203|23940356|20453058|26245675|22294718|21558396|26920887
PI3K	PIK3CA	Ambiguous	PIK3CA	ASPIRIN		CIViC	30683736|23094721
PI3K	PIK3CA	Ambiguous	PIK3CA	DASATINIB		JAX-CKB	26855149
PI3K	PIK3CA	Ambiguous	PIK3CA	CAPECITABINE		JAX-CKB|CIViC	26920887
PI3K	PIK3CA	Ambiguous	PIK3CA	RECILISIB	inhibitor	ChemblInteractions
PI3K	PIK3CA	Ambiguous	PIK3CA	DACTOLISIB	inhibitor	ClearityFoundationBiomarkers|MyCancerGenome|JAX-CKB|ChemblInteractions|CIViC|CancerCommons|MyCancerGenomeClinicalTrial	21966435|26272063|23629727|22543857|27974663|23475782|19010894|26270481|28446642|24939055|23619167|26627007|19029981|26232337|24927217|26013318|22662154|26137449
PI3K	PIK3CA	Ambiguous	PIK3CA	DOCETAXEL		PharmGKB	20157331
PI3K	PIK3CA	Ambiguous	PIK3CA	PERTUZUMAB		JAX-CKB	23940356
PI3K	PIK3CA	Ambiguous	PIK3CA	METFORMIN		JAX-CKB	23986086
PI3K	PIK3CA	Ambiguous	PIK3CA	CGM-097		JAX-CKB	27659046
PI3K	PIK3CA	Ambiguous	PIK3CA	BAY-1082439	inhibitor	ChemblInteractions
PI3K	PIK3CA	Ambiguous	PIK3CA	TOPOTECAN		JAX-CKB	21216929
PI3K	PIK3CA	Ambiguous	PIK3CA	IPATASERTIB		JAX-CKB	24141624
PI3K	PIK3CA	Ambiguous	PIK3CA	PANULISIB	inhibitor	JAX-CKB|ChemblInteractions	25700704
PI3K	PIK3CG	Ambiguous	PIK3CG	NM-404		TTD
PI3K	PIK3CG	Ambiguous	PIK3CG	GDC-0077	inhibitor	TTD
PI3K	PIK3CG	Ambiguous	PIK3CG	FIBROBLAST GROWTH FACTOR-1		NCI	16272825|15627653
PI3K	PIK3CG	Ambiguous	PIK3CG	OMIPALISIB	inhibitor	ChemblInteractions|MyCancerGenomeClinicalTrial|TTD
PI3K	PIK3CG	Ambiguous	PIK3CG	PICEATANNOL		NCI	11907067
PI3K	PIK3CG	Ambiguous	PIK3CG	RIGOSERTIB		TTD
PI3K	PIK3CG	Ambiguous	PIK3CG	COPANLISIB	inhibitor	MyCancerGenome|ChemblInteractions|MyCancerGenomeClinicalTrial
PI3K	PIK3CG	Ambiguous	PIK3CG	TASELISIB	inhibitor	ChemblInteractions|TTD
PI3K	PIK3CG	Ambiguous	PIK3CG	IONOMYCIN		NCI	9468542
PI3K	PIK3CG	Ambiguous	PIK3CG	VINCRISTINE		NCI	17363506|12874004
PI3K	PIK3CG	Ambiguous	PIK3CG	GLUCAGON		NCI	15530428
PI3K	PIK3CG	Ambiguous	PIK3CG	PROGESTERONE		NCI	16799639|14534541|15528272
PI3K	PIK3CG	Ambiguous	PIK3CG	SIMVASTATIN		NCI	15337692
PI3K	PIK3CG	Ambiguous	PIK3CG	GEDATOLISIB	inhibitor	MyCancerGenome|ChemblInteractions|MyCancerGenomeClinicalTrial|TTD
PI3K	PIK3CG	Ambiguous	PIK3CG	APITOLISIB	inhibitor	MyCancerGenome|ChemblInteractions
PI3K	PIK3CG	Ambiguous	PIK3CG	TG100-115	inhibitor	ChemblInteractions|TTD	17685602
PI3K	PIK3CG	Ambiguous	PIK3CG	ROSIGLITAZONE		NCI	16777975
PI3K	PIK3CG	Ambiguous	PIK3CG	FIMEPINOSTAT	inhibitor	TTD
PI3K	PIK3CG	Ambiguous	PIK3CG	DUVELISIB	inhibitor	ChemblInteractions|TTD	28945111|24244039|28388280
PI3K	PIK3CG	Ambiguous	PIK3CG	PUQUITINIB	inhibitor	ChemblInteractions
PI3K	PIK3CG	Ambiguous	PIK3CG	AZD-8186	inhibitor	TTD
PI3K	PIK3CG	Ambiguous	PIK3CG	CAL-263	inhibitor	ChemblInteractions
PI3K	PIK3CG	Ambiguous	PIK3CG	SONOLISIB	inhibitor	MyCancerGenome|ChemblInteractions|MyCancerGenomeClinicalTrial|TTD
PI3K	PIK3CG	Ambiguous	PIK3CG	ENZASTAURIN		TTD
PI3K	PIK3CG	Ambiguous	PIK3CG	OPRELVEKIN		NCI	8641341
PI3K	PIK3CG	Ambiguous	PIK3CG	ALTEPLASE		NCI	15020199
PI3K	PIK3CG	Ambiguous	PIK3CG	SAMOTOLISIB	inhibitor	ChemblInteractions
PI3K	PIK3CG	Ambiguous	PIK3CG	CLOZAPINE		NCI	14988008
PI3K	PIK3CG	Ambiguous	PIK3CG	FLUDARABINE		NCI	11929788
PI3K	PIK3CG	Ambiguous	PIK3CG	PI-103	inhibitor	MyCancerGenome
PI3K	PIK3CG	Ambiguous	PIK3CG	GSK-1059615	inhibitor	ChemblInteractions
PI3K	PIK3CG	Ambiguous	PIK3CG	EMODIN		NCI	17018259
PI3K	PIK3CG	Ambiguous	PIK3CG	BGT-226		TTD
PI3K	PIK3CG	Ambiguous	PIK3CG	PILARALISIB	inhibitor	MyCancerGenome|ChemblInteractions|TTD
PI3K	PIK3CG	Ambiguous	PIK3CG	ALPELISIB	inhibitor	MyCancerGenome|MyCancerGenomeClinicalTrial
PI3K	PIK3CG	Ambiguous	PIK3CG	VS-5584	inhibitor	ChemblInteractions|TTD
PI3K	PIK3CG	Ambiguous	PIK3CG	DS-7423	inhibitor	ChemblInteractions|TTD
PI3K	PIK3CG	Ambiguous	PIK3CG	FLUDEOXYGLUCOSE-F18		NCI	16883020
PI3K	PIK3CG	Ambiguous	PIK3CG	UMBRALISIB TOSYLATE		TTD
PI3K	PIK3CG	Ambiguous	PIK3CG	LIOTHYRONINE SODIUM		NCI	16966610
PI3K	PIK3CG	Ambiguous	PIK3CG	PF-04691502	inhibitor	MyCancerGenome|ChemblInteractions|TTD
PI3K	PIK3CG	Ambiguous	PIK3CG	BIMIRALISIB	inhibitor	TTD
PI3K	PIK3CG	Ambiguous	PIK3CG	PWT-33587	inhibitor	ChemblInteractions
PI3K	PIK3CG	Ambiguous	PIK3CG	OCTREOTIDE		NCI	16452215
PI3K	PIK3CG	Ambiguous	PIK3CG	PERIFOSINE		TTD
PI3K	PIK3CG	Ambiguous	PIK3CG	WX-037	inhibitor	ChemblInteractions
PI3K	PIK3CG	Ambiguous	PIK3CG	BUPARLISIB	inhibitor	MyCancerGenome|ChemblInteractions|TTD
PI3K	PIK3CG	Ambiguous	PIK3CG	RG-7666	inhibitor	ChemblInteractions|TTD	22619466
PI3K	PIK3CG	Ambiguous	PIK3CG	PHENYLEPHRINE		NCI	8928748|15662223|15743931
PI3K	PIK3CG	Ambiguous	PIK3CG	ESTRONE		NCI	16860831
PI3K	PIK3CG	Ambiguous	PIK3CG	HEPARIN		NCI	16904641
PI3K	PIK3CG	Ambiguous	PIK3CG	ALDESLEUKIN		NCI	10229082
PI3K	PIK3CG	Ambiguous	PIK3CG	ISOPROTERENOL		NCI	15936620
PI3K	PIK3CG	Ambiguous	PIK3CG	COLCHICINE		NCI	9434625
PI3K	PIK3CG	Ambiguous	PIK3CG	MELATONIN		NCI	16313502
PI3K	PIK3CG	Ambiguous	PIK3CG	SF-1126	inhibitor	ChemblInteractions
PI3K	PIK3CG	Ambiguous	PIK3CG	CAPTOPRIL		NCI	15662030
PI3K	PIK3CG	Ambiguous	PIK3CG	ZSTK-474	inhibitor	ChemblInteractions
PI3K	PIK3CG	Ambiguous	PIK3CG	PACLITAXEL		NCI	12087097
PI3K	PIK3CG	Ambiguous	PIK3CG	IMATINIB MESYLATE		NCI	15833859
PI3K	PIK3CG	Ambiguous	PIK3CG	QUERCETIN	inhibitor	MyCancerGenome	10592235
PI3K	PIK3CG	Ambiguous	PIK3CG	IPI-549		TTD
PI3K	PIK3CG	Ambiguous	PIK3CG	TROGLITAZONE		NCI	15993751
PI3K	PIK3CG	Ambiguous	PIK3CG	SULFORAPHANE		NCI	15896333
PI3K	PIK3CG	Ambiguous	PIK3CG	MANNITOL		NCI	10811601
PI3K	PIK3CG	Ambiguous	PIK3CG	INSULIN		NCI	15485656|7479761|16311098|15297437
PI3K	PIK3CG	Ambiguous	PIK3CG	BERZOSERTIB	inhibitor	TTD
PI3K	PIK3CG	Ambiguous	PIK3CG	PA-799	inhibitor	ChemblInteractions|TTD
PI3K	PIK3CG	Ambiguous	PIK3CG	RP-6530	inhibitor	ChemblInteractions
PI3K	PIK3CG	Ambiguous	PIK3CG	ALBUMIN HUMAN		NCI	16569934
PI3K	PIK3CG	Ambiguous	PIK3CG	INFIGRATINIB	inhibitor	MyCancerGenome
PI3K	PIK3CG	Ambiguous	PIK3CG	ATORVASTATIN		NCI	15824087
PI3K	PIK3CG	Ambiguous	PIK3CG	HERCEPTIN		NCI	12124352
PI3K	PIK3CG	Ambiguous	PIK3CG	FILGRASTIM		NCI	9590246
PI3K	PIK3CG	Ambiguous	PIK3CG	DAIDZEIN		NCI	16108819
PI3K	PIK3CG	Ambiguous	PIK3CG	NEOMYCIN		NCI	15024008
PI3K	PIK3CG	Ambiguous	PIK3CG	RALOXIFENE		NCI	11901050
PI3K	PIK3CG	Ambiguous	PIK3CG	VOXTALISIB	inhibitor	MyCancerGenome|ChemblInteractions|TTD
PI3K	PIK3CG	Ambiguous	PIK3CG	BGT-226	inhibitor	ChemblInteractions
PI3K	PIK3CG	Ambiguous	PIK3CG	LACTOSE, ANHYDROUS		NCI	15653554
PI3K	PIK3CG	Ambiguous	PIK3CG	GSK-2636771	inhibitor	MyCancerGenome
PI3K	PIK3CG	Ambiguous	PIK3CG	DOXORUBICIN		NCI	16905201
PI3K	PIK3CG	Ambiguous	PIK3CG	PICTILISIB	inhibitor	MyCancerGenome|ChemblInteractions
PI3K	PIK3CG	Ambiguous	PIK3CG	AZD-6482	inhibitor	ChemblInteractions
PI3K	PIK3CG	Ambiguous	PIK3CG	RECILISIB	inhibitor	ChemblInteractions
PI3K	PIK3CG	Ambiguous	PIK3CG	LOVASTATIN		NCI	15953363|9072409
PI3K	PIK3CG	Ambiguous	PIK3CG	DACTOLISIB	inhibitor	MyCancerGenome|ChemblInteractions|MyCancerGenomeClinicalTrial|TTD
PI3K	PIK3CG	Ambiguous	PIK3CG	PANULISIB	inhibitor	ChemblInteractions
PI3K	PIK3CB	Ambiguous	PIK3CB	OMIPALISIB	inhibitor	ChemblInteractions|MyCancerGenomeClinicalTrial
PI3K	PIK3CB	Ambiguous	PIK3CB	RIGOSERTIB		TdgClinicalTrial
PI3K	PIK3CB	Ambiguous	PIK3CB	COPANLISIB	inhibitor	MyCancerGenome|ChemblInteractions|MyCancerGenomeClinicalTrial
PI3K	PIK3CB	Ambiguous	PIK3CB	EPINEPHRINE		NCI	12407113
PI3K	PIK3CB	Ambiguous	PIK3CB	TASELISIB	inhibitor	ChemblInteractions
PI3K	PIK3CB	Ambiguous	PIK3CB	SURAMIN		NCI	15833899|11473364
PI3K	PIK3CB	Ambiguous	PIK3CB	PROGESTERONE		NCI	16954335
PI3K	PIK3CB	Ambiguous	PIK3CB	GEDATOLISIB	inhibitor	MyCancerGenome|ChemblInteractions|MyCancerGenomeClinicalTrial
PI3K	PIK3CB	Ambiguous	PIK3CB	APITOLISIB	inhibitor	MyCancerGenome|ChemblInteractions
PI3K	PIK3CB	Ambiguous	PIK3CB	SAR-260301	inhibitor	ChemblInteractions
PI3K	PIK3CB	Ambiguous	PIK3CB	FIMEPINOSTAT	inhibitor	ChemblInteractions
PI3K	PIK3CB	Ambiguous	PIK3CB	PUQUITINIB	inhibitor	ChemblInteractions
PI3K	PIK3CB	Ambiguous	PIK3CB	AZD-8186	inhibitor	ChemblInteractions|TTD
PI3K	PIK3CB	Ambiguous	PIK3CB	SONOLISIB	inhibitor	MyCancerGenome|ChemblInteractions|MyCancerGenomeClinicalTrial
PI3K	PIK3CB	Ambiguous	PIK3CB	INK-1117		TTD
PI3K	PIK3CB	Ambiguous	PIK3CB	SAMOTOLISIB	inhibitor	ChemblInteractions
PI3K	PIK3CB	Ambiguous	PIK3CB	PI-103	inhibitor	MyCancerGenome
PI3K	PIK3CB	Ambiguous	PIK3CB	GSK-1059615	inhibitor	ChemblInteractions
PI3K	PIK3CB	Ambiguous	PIK3CB	PILARALISIB	inhibitor	MyCancerGenome|ChemblInteractions
PI3K	PIK3CB	Ambiguous	PIK3CB	ALPELISIB	inhibitor	MyCancerGenome|MyCancerGenomeClinicalTrial
PI3K	PIK3CB	Ambiguous	PIK3CB	VS-5584	inhibitor	ChemblInteractions
PI3K	PIK3CB	Ambiguous	PIK3CB	DS-7423	inhibitor	ChemblInteractions
PI3K	PIK3CB	Ambiguous	PIK3CB	CAMPTOTHECIN		NCI	12464623
PI3K	PIK3CB	Ambiguous	PIK3CB	PF-04691502	inhibitor	MyCancerGenome|ChemblInteractions
PI3K	PIK3CB	Ambiguous	PIK3CB	BIMIRALISIB	inhibitor	TTD
PI3K	PIK3CB	Ambiguous	PIK3CB	PWT-33587	inhibitor	ChemblInteractions
PI3K	PIK3CB	Ambiguous	PIK3CB	OCTREOTIDE		NCI	16452215
PI3K	PIK3CB	Ambiguous	PIK3CB	WX-037	inhibitor	ChemblInteractions
PI3K	PIK3CB	Ambiguous	PIK3CB	BUPARLISIB	inhibitor	MyCancerGenome|ChemblInteractions|TTD
PI3K	PIK3CB	Ambiguous	PIK3CB	RG-7666	inhibitor	ChemblInteractions
PI3K	PIK3CB	Ambiguous	PIK3CB	ALVOCIDIB		NCI	14767524
PI3K	PIK3CB	Ambiguous	PIK3CB	ALDESLEUKIN		NCI	10229082
PI3K	PIK3CB	Ambiguous	PIK3CB	MIDOSTAURIN		NCI	11719451
PI3K	PIK3CB	Ambiguous	PIK3CB	SF-1126	inhibitor	ChemblInteractions
PI3K	PIK3CB	Ambiguous	PIK3CB	ZSTK-474	inhibitor	ChemblInteractions
PI3K	PIK3CB	Ambiguous	PIK3CB	QUERCETIN	inhibitor	MyCancerGenome|NCI	17045724
PI3K	PIK3CB	Ambiguous	PIK3CB	TROGLITAZONE		NCI	11553036
PI3K	PIK3CB	Ambiguous	PIK3CB	PA-799	inhibitor	ChemblInteractions|TTD
PI3K	PIK3CB	Ambiguous	PIK3CB	INFIGRATINIB	inhibitor	MyCancerGenome
PI3K	PIK3CB	Ambiguous	PIK3CB	INDOLE-3-CARBINOL		NCI	16322316
PI3K	PIK3CB	Ambiguous	PIK3CB	PRASTERONE		NCI	15501480
PI3K	PIK3CB	Ambiguous	PIK3CB	VOXTALISIB	inhibitor	MyCancerGenome|ChemblInteractions
PI3K	PIK3CB	Ambiguous	PIK3CB	BGT-226	inhibitor	ChemblInteractions
PI3K	PIK3CB	Ambiguous	PIK3CB	GSK-2636771	inhibitor	MyCancerGenome|ChemblInteractions|TTD
PI3K	PIK3CB	Ambiguous	PIK3CB	DOXORUBICIN		NCI	16905201
PI3K	PIK3CB	Ambiguous	PIK3CB	PICTILISIB	inhibitor	MyCancerGenome|ChemblInteractions
PI3K	PIK3CB	Ambiguous	PIK3CB	AZD-6482	inhibitor	ChemblInteractions
PI3K	PIK3CB	Ambiguous	PIK3CB	RECILISIB	inhibitor	ChemblInteractions
PI3K	PIK3CB	Ambiguous	PIK3CB	LOVASTATIN		NCI	9072409
PI3K	PIK3CB	Ambiguous	PIK3CB	DACTOLISIB	inhibitor	MyCancerGenome|ChemblInteractions|MyCancerGenomeClinicalTrial
PI3K	PIK3CB	Ambiguous	PIK3CB	BAY-1082439	inhibitor	ChemblInteractions
PI3K	PIK3CB	Ambiguous	PIK3CB	PANULISIB	inhibitor	ChemblInteractions
PI3K	PIK3R5	Ambiguous	PIK3R5	OMIPALISIB	inhibitor	ChemblInteractions|MyCancerGenomeClinicalTrial
PI3K	PIK3R5	Ambiguous	PIK3R5	COPANLISIB	inhibitor	MyCancerGenome|ChemblInteractions|MyCancerGenomeClinicalTrial
PI3K	PIK3R5	Ambiguous	PIK3R5	TASELISIB	inhibitor	ChemblInteractions
PI3K	PIK3R5	Ambiguous	PIK3R5	GEDATOLISIB	inhibitor	MyCancerGenome|ChemblInteractions|MyCancerGenomeClinicalTrial
PI3K	PIK3R5	Ambiguous	PIK3R5	APITOLISIB	inhibitor	MyCancerGenome|ChemblInteractions
PI3K	PIK3R5	Ambiguous	PIK3R5	PUQUITINIB	inhibitor	ChemblInteractions
PI3K	PIK3R5	Ambiguous	PIK3R5	SONOLISIB	inhibitor	MyCancerGenome|ChemblInteractions|MyCancerGenomeClinicalTrial
PI3K	PIK3R5	Ambiguous	PIK3R5	SAMOTOLISIB	inhibitor	ChemblInteractions
PI3K	PIK3R5	Ambiguous	PIK3R5	PI-103	inhibitor	MyCancerGenome
PI3K	PIK3R5	Ambiguous	PIK3R5	GSK-1059615	inhibitor	ChemblInteractions
PI3K	PIK3R5	Ambiguous	PIK3R5	PILARALISIB	inhibitor	MyCancerGenome|ChemblInteractions
PI3K	PIK3R5	Ambiguous	PIK3R5	ALPELISIB	inhibitor	MyCancerGenome|MyCancerGenomeClinicalTrial
PI3K	PIK3R5	Ambiguous	PIK3R5	VS-5584	inhibitor	ChemblInteractions
PI3K	PIK3R5	Ambiguous	PIK3R5	DS-7423	inhibitor	ChemblInteractions
PI3K	PIK3R5	Ambiguous	PIK3R5	PF-04691502	inhibitor	MyCancerGenome|ChemblInteractions
PI3K	PIK3R5	Ambiguous	PIK3R5	PWT-33587	inhibitor	ChemblInteractions
PI3K	PIK3R5	Ambiguous	PIK3R5	WX-037	inhibitor	ChemblInteractions
PI3K	PIK3R5	Ambiguous	PIK3R5	BUPARLISIB	inhibitor	MyCancerGenome|ChemblInteractions
PI3K	PIK3R5	Ambiguous	PIK3R5	RG-7666	inhibitor	ChemblInteractions
PI3K	PIK3R5	Ambiguous	PIK3R5	SF-1126	inhibitor	ChemblInteractions
PI3K	PIK3R5	Ambiguous	PIK3R5	ZSTK-474	inhibitor	ChemblInteractions
PI3K	PIK3R5	Ambiguous	PIK3R5	QUERCETIN	inhibitor	MyCancerGenome
PI3K	PIK3R5	Ambiguous	PIK3R5	PA-799	inhibitor	ChemblInteractions
PI3K	PIK3R5	Ambiguous	PIK3R5	INFIGRATINIB	inhibitor	MyCancerGenome
PI3K	PIK3R5	Ambiguous	PIK3R5	VOXTALISIB	inhibitor	MyCancerGenome|ChemblInteractions
PI3K	PIK3R5	Ambiguous	PIK3R5	BGT-226	inhibitor	ChemblInteractions
PI3K	PIK3R5	Ambiguous	PIK3R5	GSK-2636771	inhibitor	MyCancerGenome
PI3K	PIK3R5	Ambiguous	PIK3R5	PICTILISIB	inhibitor	MyCancerGenome|ChemblInteractions
PI3K	PIK3R5	Ambiguous	PIK3R5	AZD-6482	inhibitor	ChemblInteractions
PI3K	PIK3R5	Ambiguous	PIK3R5	RECILISIB	inhibitor	ChemblInteractions
PI3K	PIK3R5	Ambiguous	PIK3R5	DACTOLISIB	inhibitor	MyCancerGenome|ChemblInteractions|MyCancerGenomeClinicalTrial
PI3K	PIK3R5	Ambiguous	PIK3R5	PANULISIB	inhibitor	ChemblInteractions
PI3K	PIK3CD	Ambiguous	PIK3CD	ACALISIB	inhibitor	ChemblInteractions|TTD
PI3K	PIK3CD	Ambiguous	PIK3CD	GSK-2269557	inhibitor	ChemblInteractions
PI3K	PIK3CD	Ambiguous	PIK3CD	OMIPALISIB	inhibitor	ClearityFoundationClinicalTrial|ChemblInteractions|MyCancerGenomeClinicalTrial
PI3K	PIK3CD	Ambiguous	PIK3CD	RIGOSERTIB		TdgClinicalTrial
PI3K	PIK3CD	Ambiguous	PIK3CD	COPANLISIB	inhibitor	MyCancerGenome|ChemblInteractions|MyCancerGenomeClinicalTrial
PI3K	PIK3CD	Ambiguous	PIK3CD	TASELISIB	inhibitor	ChemblInteractions
PI3K	PIK3CD	Ambiguous	PIK3CD	GEDATOLISIB	inhibitor	MyCancerGenome|ChemblInteractions|MyCancerGenomeClinicalTrial
PI3K	PIK3CD	Ambiguous	PIK3CD	APITOLISIB	inhibitor	MyCancerGenome|ChemblInteractions
PI3K	PIK3CD	Ambiguous	PIK3CD	TG100-115	inhibitor	ChemblInteractions	17685602
PI3K	PIK3CD	Ambiguous	PIK3CD	FIMEPINOSTAT	inhibitor	ChemblInteractions
PI3K	PIK3CD	Ambiguous	PIK3CD	DUVELISIB	inhibitor	ChemblInteractions|TTD	28945111|24244039|28388280
PI3K	PIK3CD	Ambiguous	PIK3CD	PUQUITINIB	inhibitor	ChemblInteractions
PI3K	PIK3CD	Ambiguous	PIK3CD	AZD-8186	inhibitor	ChemblInteractions
PI3K	PIK3CD	Ambiguous	PIK3CD	CAL-263	inhibitor	ChemblInteractions
PI3K	PIK3CD	Ambiguous	PIK3CD	SONOLISIB	inhibitor	MyCancerGenome|ChemblInteractions|MyCancerGenomeClinicalTrial
PI3K	PIK3CD	Ambiguous	PIK3CD	GS-9901		TTD
PI3K	PIK3CD	Ambiguous	PIK3CD	SAMOTOLISIB	inhibitor	ChemblInteractions
PI3K	PIK3CD	Ambiguous	PIK3CD	PI-103	inhibitor	MyCancerGenome
PI3K	PIK3CD	Ambiguous	PIK3CD	GSK-1059615	inhibitor	ChemblInteractions
PI3K	PIK3CD	Ambiguous	PIK3CD	PILARALISIB	inhibitor	MyCancerGenome|ClearityFoundationClinicalTrial|ChemblInteractions
PI3K	PIK3CD	Ambiguous	PIK3CD	ALPELISIB	inhibitor	MyCancerGenome|MyCancerGenomeClinicalTrial
PI3K	PIK3CD	Ambiguous	PIK3CD	VS-5584	inhibitor	ChemblInteractions
PI3K	PIK3CD	Ambiguous	PIK3CD	DS-7423	inhibitor	ChemblInteractions
PI3K	PIK3CD	Ambiguous	PIK3CD	UMBRALISIB TOSYLATE	inhibitor	ChemblInteractions|TTD
PI3K	PIK3CD	Ambiguous	PIK3CD	PF-04691502	inhibitor	MyCancerGenome|ChemblInteractions
PI3K	PIK3CD	Ambiguous	PIK3CD	PWT-33587	inhibitor	ChemblInteractions
PI3K	PIK3CD	Ambiguous	PIK3CD	WX-037	inhibitor	ChemblInteractions
PI3K	PIK3CD	Ambiguous	PIK3CD	BUPARLISIB	inhibitor	MyCancerGenome|ClearityFoundationClinicalTrial|ChemblInteractions|TTD
PI3K	PIK3CD	Ambiguous	PIK3CD	RG-7666	inhibitor	ChemblInteractions
PI3K	PIK3CD	Ambiguous	PIK3CD	AMG-319	inhibitor	ChemblInteractions
PI3K	PIK3CD	Ambiguous	PIK3CD	ME-401	inhibitor	ChemblInteractions|TTD
PI3K	PIK3CD	Ambiguous	PIK3CD	IDELALISIB	inhibitor	MyCancerGenome|TdgClinicalTrial|ChemblInteractions|TTD
PI3K	PIK3CD	Ambiguous	PIK3CD	SF-1126	inhibitor	ChemblInteractions
PI3K	PIK3CD	Ambiguous	PIK3CD	ZSTK-474	inhibitor	ChemblInteractions
PI3K	PIK3CD	Ambiguous	PIK3CD	QUERCETIN	inhibitor	MyCancerGenome
PI3K	PIK3CD	Ambiguous	PIK3CD	PA-799	inhibitor	ChemblInteractions|TTD
PI3K	PIK3CD	Ambiguous	PIK3CD	RP-6530	inhibitor	ChemblInteractions
PI3K	PIK3CD	Ambiguous	PIK3CD	INFIGRATINIB	inhibitor	MyCancerGenome
PI3K	PIK3CD	Ambiguous	PIK3CD	INCB-40093	inhibitor	ChemblInteractions
PI3K	PIK3CD	Ambiguous	PIK3CD	VOXTALISIB	inhibitor	MyCancerGenome|ChemblInteractions
PI3K	PIK3CD	Ambiguous	PIK3CD	BGT-226	inhibitor	ChemblInteractions
PI3K	PIK3CD	Ambiguous	PIK3CD	GSK-2636771	inhibitor	MyCancerGenome
PI3K	PIK3CD	Ambiguous	PIK3CD	PICTILISIB	inhibitor	MyCancerGenome|ChemblInteractions
PI3K	PIK3CD	Ambiguous	PIK3CD	AZD-6482	inhibitor	ChemblInteractions
PI3K	PIK3CD	Ambiguous	PIK3CD	RECILISIB	inhibitor	ChemblInteractions
PI3K	PIK3CD	Ambiguous	PIK3CD	DACTOLISIB	inhibitor	MyCancerGenome|ChemblInteractions|MyCancerGenomeClinicalTrial
PI3K	PIK3CD	Ambiguous	PIK3CD	PANULISIB	inhibitor	ChemblInteractions
PI3K	PIK3R1	Ambiguous	PIK3R1	EVEROLIMUS		PharmGKB
PI3K	PIK3R1	Ambiguous	PIK3R1	OMIPALISIB	inhibitor	ClearityFoundationBiomarkers|ChemblInteractions|MyCancerGenomeClinicalTrial
PI3K	PIK3R1	Ambiguous	PIK3R1	COPANLISIB	inhibitor	ClearityFoundationBiomarkers|MyCancerGenome|ChemblInteractions|MyCancerGenomeClinicalTrial
PI3K	PIK3R1	Ambiguous	PIK3R1	TASELISIB	inhibitor	ChemblInteractions
PI3K	PIK3R1	Ambiguous	PIK3R1	GEDATOLISIB	inhibitor	ClearityFoundationBiomarkers|MyCancerGenome|ChemblInteractions|MyCancerGenomeClinicalTrial
PI3K	PIK3R1	Ambiguous	PIK3R1	APITOLISIB	inhibitor	MyCancerGenome|ChemblInteractions
PI3K	PIK3R1	Ambiguous	PIK3R1	PUQUITINIB	inhibitor	ChemblInteractions
PI3K	PIK3R1	Ambiguous	PIK3R1	SONOLISIB	inhibitor	MyCancerGenome|ChemblInteractions|MyCancerGenomeClinicalTrial
PI3K	PIK3R1	Ambiguous	PIK3R1	SAMOTOLISIB	inhibitor	ChemblInteractions
PI3K	PIK3R1	Ambiguous	PIK3R1	PI-103	inhibitor	MyCancerGenome
PI3K	PIK3R1	Ambiguous	PIK3R1	GSK-1059615	inhibitor	ChemblInteractions
PI3K	PIK3R1	Ambiguous	PIK3R1	PILARALISIB	inhibitor	ClearityFoundationBiomarkers|MyCancerGenome|ChemblInteractions
PI3K	PIK3R1	Ambiguous	PIK3R1	ALPELISIB	inhibitor	ClearityFoundationBiomarkers|MyCancerGenome|MyCancerGenomeClinicalTrial
PI3K	PIK3R1	Ambiguous	PIK3R1	VS-5584	inhibitor	ChemblInteractions
PI3K	PIK3R1	Ambiguous	PIK3R1	DS-7423	inhibitor	ClearityFoundationBiomarkers|ChemblInteractions
PI3K	PIK3R1	Ambiguous	PIK3R1	PF-04691502	inhibitor	ClearityFoundationBiomarkers|MyCancerGenome|ChemblInteractions
PI3K	PIK3R1	Ambiguous	PIK3R1	PWT-33587	inhibitor	ChemblInteractions
PI3K	PIK3R1	Ambiguous	PIK3R1	WX-037	inhibitor	ChemblInteractions
PI3K	PIK3R1	Ambiguous	PIK3R1	BUPARLISIB	inhibitor	MyCancerGenome|ChemblInteractions
PI3K	PIK3R1	Ambiguous	PIK3R1	RG-7666	inhibitor	ChemblInteractions
PI3K	PIK3R1	Ambiguous	PIK3R1	SF-1126	inhibitor	ChemblInteractions
PI3K	PIK3R1	Ambiguous	PIK3R1	ZSTK-474	inhibitor	ChemblInteractions
PI3K	PIK3R1	Ambiguous	PIK3R1	QUERCETIN	inhibitor	MyCancerGenome
PI3K	PIK3R1	Ambiguous	PIK3R1	PA-799	inhibitor	ChemblInteractions
PI3K	PIK3R1	Ambiguous	PIK3R1	INFIGRATINIB	inhibitor	MyCancerGenome
PI3K	PIK3R1	Ambiguous	PIK3R1	VOXTALISIB	inhibitor	MyCancerGenome|ChemblInteractions
PI3K	PIK3R1	Ambiguous	PIK3R1	BGT-226	inhibitor	ChemblInteractions
PI3K	PIK3R1	Ambiguous	PIK3R1	GSK-2636771	inhibitor	MyCancerGenome
PI3K	PIK3R1	Ambiguous	PIK3R1	PICTILISIB	inhibitor	MyCancerGenome|ChemblInteractions
PI3K	PIK3R1	Ambiguous	PIK3R1	AZD-6482	inhibitor	ChemblInteractions
PI3K	PIK3R1	Ambiguous	PIK3R1	RECILISIB	inhibitor	ChemblInteractions
PI3K	PIK3R1	Ambiguous	PIK3R1	DACTOLISIB	inhibitor	ClearityFoundationBiomarkers|MyCancerGenome|ChemblInteractions|MyCancerGenomeClinicalTrial
PI3K	PIK3R1	Ambiguous	PIK3R1	PANULISIB	inhibitor	ChemblInteractions
PI3K	PIK3R4	Ambiguous	PIK3R4	OMIPALISIB	inhibitor	MyCancerGenomeClinicalTrial
PI3K	PIK3R4	Ambiguous	PIK3R4	COPANLISIB	inhibitor	MyCancerGenome|MyCancerGenomeClinicalTrial
PI3K	PIK3R4	Ambiguous	PIK3R4	GEDATOLISIB	inhibitor	MyCancerGenome|MyCancerGenomeClinicalTrial
PI3K	PIK3R4	Ambiguous	PIK3R4	APITOLISIB	inhibitor	MyCancerGenome
PI3K	PIK3R4	Ambiguous	PIK3R4	SONOLISIB	inhibitor	MyCancerGenome|MyCancerGenomeClinicalTrial
PI3K	PIK3R4	Ambiguous	PIK3R4	PI-103	inhibitor	MyCancerGenome
PI3K	PIK3R4	Ambiguous	PIK3R4	PILARALISIB	inhibitor	MyCancerGenome
PI3K	PIK3R4	Ambiguous	PIK3R4	ALPELISIB	inhibitor	MyCancerGenome|MyCancerGenomeClinicalTrial
PI3K	PIK3R4	Ambiguous	PIK3R4	PF-04691502	inhibitor	MyCancerGenome
PI3K	PIK3R4	Ambiguous	PIK3R4	BUPARLISIB	inhibitor	MyCancerGenome
PI3K	PIK3R4	Ambiguous	PIK3R4	QUERCETIN	inhibitor	MyCancerGenome
PI3K	PIK3R4	Ambiguous	PIK3R4	INFIGRATINIB	inhibitor	MyCancerGenome
PI3K	PIK3R4	Ambiguous	PIK3R4	VOXTALISIB	inhibitor	MyCancerGenome
PI3K	PIK3R4	Ambiguous	PIK3R4	GSK-2636771	inhibitor	MyCancerGenome
PI3K	PIK3R4	Ambiguous	PIK3R4	PICTILISIB	inhibitor	MyCancerGenome
PI3K	PIK3R4	Ambiguous	PIK3R4	DACTOLISIB	inhibitor	MyCancerGenome|MyCancerGenomeClinicalTrial
PI3K	PIK3C3	Ambiguous	PIK3C3	COPANLISIB	inhibitor	MyCancerGenome
PI3K	PIK3C3	Ambiguous	PIK3C3	GEDATOLISIB	inhibitor	MyCancerGenome
PI3K	PIK3C3	Ambiguous	PIK3C3	APITOLISIB	inhibitor	MyCancerGenome
PI3K	PIK3C3	Ambiguous	PIK3C3	SONOLISIB	inhibitor	MyCancerGenome
PI3K	PIK3C3	Ambiguous	PIK3C3	PI-103	inhibitor	MyCancerGenome
PI3K	PIK3C3	Ambiguous	PIK3C3	PILARALISIB	inhibitor	MyCancerGenome
PI3K	PIK3C3	Ambiguous	PIK3C3	ALPELISIB	inhibitor	MyCancerGenome
PI3K	PIK3C3	Ambiguous	PIK3C3	PF-04691502	inhibitor	MyCancerGenome
PI3K	PIK3C3	Ambiguous	PIK3C3	BUPARLISIB	inhibitor	MyCancerGenome
PI3K	PIK3C3	Ambiguous	PIK3C3	QUERCETIN	inhibitor	MyCancerGenome
PI3K	PIK3C3	Ambiguous	PIK3C3	INFIGRATINIB	inhibitor	MyCancerGenome
PI3K	PIK3C3	Ambiguous	PIK3C3	VOXTALISIB	inhibitor	MyCancerGenome
PI3K	PIK3C3	Ambiguous	PIK3C3	GSK-2636771	inhibitor	MyCancerGenome
PI3K	PIK3C3	Ambiguous	PIK3C3	PICTILISIB	inhibitor	MyCancerGenome
PI3K	PIK3C3	Ambiguous	PIK3C3	DACTOLISIB	inhibitor	MyCancerGenome
PI3K	PIK3R2	Ambiguous	PIK3R2	OMIPALISIB	inhibitor	ChemblInteractions|MyCancerGenomeClinicalTrial
PI3K	PIK3R2	Ambiguous	PIK3R2	COPANLISIB	inhibitor	MyCancerGenome|ChemblInteractions|MyCancerGenomeClinicalTrial
PI3K	PIK3R2	Ambiguous	PIK3R2	VEMURAFENIB		CIViC	24265155
PI3K	PIK3R2	Ambiguous	PIK3R2	TASELISIB	inhibitor	ChemblInteractions
PI3K	PIK3R2	Ambiguous	PIK3R2	GEDATOLISIB	inhibitor	MyCancerGenome|ChemblInteractions|MyCancerGenomeClinicalTrial
PI3K	PIK3R2	Ambiguous	PIK3R2	APITOLISIB	inhibitor	MyCancerGenome|ChemblInteractions
PI3K	PIK3R2	Ambiguous	PIK3R2	PUQUITINIB	inhibitor	ChemblInteractions
PI3K	PIK3R2	Ambiguous	PIK3R2	SONOLISIB	inhibitor	MyCancerGenome|ChemblInteractions|MyCancerGenomeClinicalTrial
PI3K	PIK3R2	Ambiguous	PIK3R2	SAMOTOLISIB	inhibitor	ChemblInteractions
PI3K	PIK3R2	Ambiguous	PIK3R2	PI-103	inhibitor	MyCancerGenome
PI3K	PIK3R2	Ambiguous	PIK3R2	GSK-1059615	inhibitor	ChemblInteractions
PI3K	PIK3R2	Ambiguous	PIK3R2	EPIRUBICIN		PharmGKB
PI3K	PIK3R2	Ambiguous	PIK3R2	PILARALISIB	inhibitor	MyCancerGenome|ChemblInteractions
PI3K	PIK3R2	Ambiguous	PIK3R2	ALPELISIB	inhibitor	MyCancerGenome|MyCancerGenomeClinicalTrial
PI3K	PIK3R2	Ambiguous	PIK3R2	VS-5584	inhibitor	ChemblInteractions
PI3K	PIK3R2	Ambiguous	PIK3R2	DS-7423	inhibitor	ChemblInteractions
PI3K	PIK3R2	Ambiguous	PIK3R2	CYCLOPHOSPHAMIDE		PharmGKB
PI3K	PIK3R2	Ambiguous	PIK3R2	PF-04691502	inhibitor	MyCancerGenome|ChemblInteractions
PI3K	PIK3R2	Ambiguous	PIK3R2	PWT-33587	inhibitor	ChemblInteractions
PI3K	PIK3R2	Ambiguous	PIK3R2	WX-037	inhibitor	ChemblInteractions
PI3K	PIK3R2	Ambiguous	PIK3R2	BUPARLISIB	inhibitor	MyCancerGenome|ChemblInteractions
PI3K	PIK3R2	Ambiguous	PIK3R2	RG-7666	inhibitor	ChemblInteractions
PI3K	PIK3R2	Ambiguous	PIK3R2	SF-1126	inhibitor	ChemblInteractions
PI3K	PIK3R2	Ambiguous	PIK3R2	ZSTK-474	inhibitor	ChemblInteractions
PI3K	PIK3R2	Ambiguous	PIK3R2	QUERCETIN	inhibitor	MyCancerGenome
PI3K	PIK3R2	Ambiguous	PIK3R2	FLUOROURACIL		PharmGKB
PI3K	PIK3R2	Ambiguous	PIK3R2	PA-799	inhibitor	ChemblInteractions
PI3K	PIK3R2	Ambiguous	PIK3R2	INFIGRATINIB	inhibitor	MyCancerGenome
PI3K	PIK3R2	Ambiguous	PIK3R2	VOXTALISIB	inhibitor	MyCancerGenome|ChemblInteractions
PI3K	PIK3R2	Ambiguous	PIK3R2	BGT-226	inhibitor	ChemblInteractions
PI3K	PIK3R2	Ambiguous	PIK3R2	GSK-2636771	inhibitor	MyCancerGenome
PI3K	PIK3R2	Ambiguous	PIK3R2	PICTILISIB	inhibitor	MyCancerGenome|ChemblInteractions
PI3K	PIK3R2	Ambiguous	PIK3R2	AZD-6482	inhibitor	ChemblInteractions
PI3K	PIK3R2	Ambiguous	PIK3R2	RECILISIB	inhibitor	ChemblInteractions
PI3K	PIK3R2	Ambiguous	PIK3R2	DACTOLISIB	inhibitor	MyCancerGenome|ChemblInteractions|MyCancerGenomeClinicalTrial
PI3K	PIK3R2	Ambiguous	PIK3R2	PANULISIB	inhibitor	ChemblInteractions
PI3K	PIK3C2A	Ambiguous	PIK3C2A	COPANLISIB	inhibitor	MyCancerGenome
PI3K	PIK3C2A	Ambiguous	PIK3C2A	GEDATOLISIB	inhibitor	MyCancerGenome
PI3K	PIK3C2A	Ambiguous	PIK3C2A	APITOLISIB	inhibitor	MyCancerGenome
PI3K	PIK3C2A	Ambiguous	PIK3C2A	SONOLISIB	inhibitor	MyCancerGenome
PI3K	PIK3C2A	Ambiguous	PIK3C2A	PI-103	inhibitor	MyCancerGenome
PI3K	PIK3C2A	Ambiguous	PIK3C2A	PILARALISIB	inhibitor	MyCancerGenome
PI3K	PIK3C2A	Ambiguous	PIK3C2A	ALPELISIB	inhibitor	MyCancerGenome
PI3K	PIK3C2A	Ambiguous	PIK3C2A	PF-04691502	inhibitor	MyCancerGenome
PI3K	PIK3C2A	Ambiguous	PIK3C2A	BUPARLISIB	inhibitor	MyCancerGenome
PI3K	PIK3C2A	Ambiguous	PIK3C2A	QUERCETIN	inhibitor	MyCancerGenome
PI3K	PIK3C2A	Ambiguous	PIK3C2A	INFIGRATINIB	inhibitor	MyCancerGenome
PI3K	PIK3C2A	Ambiguous	PIK3C2A	VOXTALISIB	inhibitor	MyCancerGenome
PI3K	PIK3C2A	Ambiguous	PIK3C2A	GSK-2636771	inhibitor	MyCancerGenome
PI3K	PIK3C2A	Ambiguous	PIK3C2A	PICTILISIB	inhibitor	MyCancerGenome
PI3K	PIK3C2A	Ambiguous	PIK3C2A	DACTOLISIB	inhibitor	MyCancerGenome
PI3K	PIK3C2B	Ambiguous	PIK3C2B	COPANLISIB	inhibitor	MyCancerGenome
PI3K	PIK3C2B	Ambiguous	PIK3C2B	GEDATOLISIB	inhibitor	MyCancerGenome
PI3K	PIK3C2B	Ambiguous	PIK3C2B	APITOLISIB	inhibitor	MyCancerGenome
PI3K	PIK3C2B	Ambiguous	PIK3C2B	SONOLISIB	inhibitor	MyCancerGenome
PI3K	PIK3C2B	Ambiguous	PIK3C2B	PI-103	inhibitor	MyCancerGenome
PI3K	PIK3C2B	Ambiguous	PIK3C2B	PILARALISIB	inhibitor	MyCancerGenome
PI3K	PIK3C2B	Ambiguous	PIK3C2B	ALPELISIB	inhibitor	MyCancerGenome
PI3K	PIK3C2B	Ambiguous	PIK3C2B	PF-04691502	inhibitor	MyCancerGenome
PI3K	PIK3C2B	Ambiguous	PIK3C2B	BUPARLISIB	inhibitor	MyCancerGenome
PI3K	PIK3C2B	Ambiguous	PIK3C2B	QUERCETIN	inhibitor	MyCancerGenome
PI3K	PIK3C2B	Ambiguous	PIK3C2B	INFIGRATINIB	inhibitor	MyCancerGenome
PI3K	PIK3C2B	Ambiguous	PIK3C2B	VOXTALISIB	inhibitor	MyCancerGenome
PI3K	PIK3C2B	Ambiguous	PIK3C2B	GSK-2636771	inhibitor	MyCancerGenome
PI3K	PIK3C2B	Ambiguous	PIK3C2B	PICTILISIB	inhibitor	MyCancerGenome
PI3K	PIK3C2B	Ambiguous	PIK3C2B	DACTOLISIB	inhibitor	MyCancerGenome
PI3K	PIK3R6	Ambiguous	PIK3R6	OMIPALISIB	inhibitor	MyCancerGenomeClinicalTrial
PI3K	PIK3R6	Ambiguous	PIK3R6	COPANLISIB	inhibitor	MyCancerGenome|MyCancerGenomeClinicalTrial
PI3K	PIK3R6	Ambiguous	PIK3R6	GEDATOLISIB	inhibitor	MyCancerGenome|MyCancerGenomeClinicalTrial
PI3K	PIK3R6	Ambiguous	PIK3R6	APITOLISIB	inhibitor	MyCancerGenome
PI3K	PIK3R6	Ambiguous	PIK3R6	SONOLISIB	inhibitor	MyCancerGenome|MyCancerGenomeClinicalTrial
PI3K	PIK3R6	Ambiguous	PIK3R6	PI-103	inhibitor	MyCancerGenome
PI3K	PIK3R6	Ambiguous	PIK3R6	PILARALISIB	inhibitor	MyCancerGenome
PI3K	PIK3R6	Ambiguous	PIK3R6	ALPELISIB	inhibitor	MyCancerGenome|MyCancerGenomeClinicalTrial
PI3K	PIK3R6	Ambiguous	PIK3R6	PF-04691502	inhibitor	MyCancerGenome
PI3K	PIK3R6	Ambiguous	PIK3R6	BUPARLISIB	inhibitor	MyCancerGenome
PI3K	PIK3R6	Ambiguous	PIK3R6	QUERCETIN	inhibitor	MyCancerGenome
PI3K	PIK3R6	Ambiguous	PIK3R6	INFIGRATINIB	inhibitor	MyCancerGenome
PI3K	PIK3R6	Ambiguous	PIK3R6	VOXTALISIB	inhibitor	MyCancerGenome
PI3K	PIK3R6	Ambiguous	PIK3R6	GSK-2636771	inhibitor	MyCancerGenome
PI3K	PIK3R6	Ambiguous	PIK3R6	PICTILISIB	inhibitor	MyCancerGenome
PI3K	PIK3R6	Ambiguous	PIK3R6	DACTOLISIB	inhibitor	MyCancerGenome|MyCancerGenomeClinicalTrial
PI3K	PIK3C2G	Ambiguous	PIK3C2G	COPANLISIB	inhibitor	MyCancerGenome
PI3K	PIK3C2G	Ambiguous	PIK3C2G	GEDATOLISIB	inhibitor	MyCancerGenome
PI3K	PIK3C2G	Ambiguous	PIK3C2G	APITOLISIB	inhibitor	MyCancerGenome
PI3K	PIK3C2G	Ambiguous	PIK3C2G	SONOLISIB	inhibitor	MyCancerGenome
PI3K	PIK3C2G	Ambiguous	PIK3C2G	PI-103	inhibitor	MyCancerGenome
PI3K	PIK3C2G	Ambiguous	PIK3C2G	PILARALISIB	inhibitor	MyCancerGenome
PI3K	PIK3C2G	Ambiguous	PIK3C2G	ALPELISIB	inhibitor	MyCancerGenome
PI3K	PIK3C2G	Ambiguous	PIK3C2G	PF-04691502	inhibitor	MyCancerGenome
PI3K	PIK3C2G	Ambiguous	PIK3C2G	BUPARLISIB	inhibitor	MyCancerGenome
PI3K	PIK3C2G	Ambiguous	PIK3C2G	QUERCETIN	inhibitor	MyCancerGenome
PI3K	PIK3C2G	Ambiguous	PIK3C2G	INFIGRATINIB	inhibitor	MyCancerGenome
PI3K	PIK3C2G	Ambiguous	PIK3C2G	VOXTALISIB	inhibitor	MyCancerGenome
PI3K	PIK3C2G	Ambiguous	PIK3C2G	GSK-2636771	inhibitor	MyCancerGenome
PI3K	PIK3C2G	Ambiguous	PIK3C2G	PICTILISIB	inhibitor	MyCancerGenome
PI3K	PIK3C2G	Ambiguous	PIK3C2G	DACTOLISIB	inhibitor	MyCancerGenome
PI3K	PIK3R3	Ambiguous	PIK3R3	OMIPALISIB	inhibitor	ChemblInteractions|MyCancerGenomeClinicalTrial
PI3K	PIK3R3	Ambiguous	PIK3R3	COPANLISIB	inhibitor	MyCancerGenome|ChemblInteractions|MyCancerGenomeClinicalTrial
PI3K	PIK3R3	Ambiguous	PIK3R3	TASELISIB	inhibitor	ChemblInteractions
PI3K	PIK3R3	Ambiguous	PIK3R3	GEDATOLISIB	inhibitor	MyCancerGenome|ChemblInteractions|MyCancerGenomeClinicalTrial
PI3K	PIK3R3	Ambiguous	PIK3R3	APITOLISIB	inhibitor	MyCancerGenome|ChemblInteractions
PI3K	PIK3R3	Ambiguous	PIK3R3	PUQUITINIB	inhibitor	ChemblInteractions
PI3K	PIK3R3	Ambiguous	PIK3R3	SONOLISIB	inhibitor	MyCancerGenome|ChemblInteractions|MyCancerGenomeClinicalTrial
PI3K	PIK3R3	Ambiguous	PIK3R3	SAMOTOLISIB	inhibitor	ChemblInteractions
PI3K	PIK3R3	Ambiguous	PIK3R3	PI-103	inhibitor	MyCancerGenome
PI3K	PIK3R3	Ambiguous	PIK3R3	GSK-1059615	inhibitor	ChemblInteractions
PI3K	PIK3R3	Ambiguous	PIK3R3	PILARALISIB	inhibitor	MyCancerGenome|ChemblInteractions
PI3K	PIK3R3	Ambiguous	PIK3R3	ALPELISIB	inhibitor	MyCancerGenome|MyCancerGenomeClinicalTrial
PI3K	PIK3R3	Ambiguous	PIK3R3	VS-5584	inhibitor	ChemblInteractions
PI3K	PIK3R3	Ambiguous	PIK3R3	DS-7423	inhibitor	ChemblInteractions
PI3K	PIK3R3	Ambiguous	PIK3R3	PF-04691502	inhibitor	MyCancerGenome|ChemblInteractions
PI3K	PIK3R3	Ambiguous	PIK3R3	PWT-33587	inhibitor	ChemblInteractions
PI3K	PIK3R3	Ambiguous	PIK3R3	WX-037	inhibitor	ChemblInteractions
PI3K	PIK3R3	Ambiguous	PIK3R3	BUPARLISIB	inhibitor	MyCancerGenome|ChemblInteractions
PI3K	PIK3R3	Ambiguous	PIK3R3	RG-7666	inhibitor	ChemblInteractions
PI3K	PIK3R3	Ambiguous	PIK3R3	SF-1126	inhibitor	ChemblInteractions
PI3K	PIK3R3	Ambiguous	PIK3R3	ZSTK-474	inhibitor	ChemblInteractions
PI3K	PIK3R3	Ambiguous	PIK3R3	QUERCETIN	inhibitor	MyCancerGenome
PI3K	PIK3R3	Ambiguous	PIK3R3	PA-799	inhibitor	ChemblInteractions
PI3K	PIK3R3	Ambiguous	PIK3R3	INFIGRATINIB	inhibitor	MyCancerGenome
PI3K	PIK3R3	Ambiguous	PIK3R3	VOXTALISIB	inhibitor	MyCancerGenome|ChemblInteractions
PI3K	PIK3R3	Ambiguous	PIK3R3	BGT-226	inhibitor	ChemblInteractions
PI3K	PIK3R3	Ambiguous	PIK3R3	GSK-2636771	inhibitor	MyCancerGenome
PI3K	PIK3R3	Ambiguous	PIK3R3	PICTILISIB	inhibitor	MyCancerGenome|ChemblInteractions
PI3K	PIK3R3	Ambiguous	PIK3R3	AZD-6482	inhibitor	ChemblInteractions
PI3K	PIK3R3	Ambiguous	PIK3R3	RECILISIB	inhibitor	ChemblInteractions
PI3K	PIK3R3	Ambiguous	PIK3R3	DACTOLISIB	inhibitor	MyCancerGenome|ChemblInteractions|MyCancerGenomeClinicalTrial
PI3K	PIK3R3	Ambiguous	PIK3R3	PANULISIB	inhibitor	ChemblInteractions
ERBB2	ERBB2	Definite	ERBB2	OSIMERTINIB MESYLATE	inhibitor	ChemblInteractions
ERBB2	ERBB2	Definite	ERBB2	AC-480	inhibitor	TALC|DTC|MyCancerGenome|TdgClinicalTrial|JAX-CKB|ChemblInteractions|TTD	19821562|21576284
ERBB2	ERBB2	Definite	ERBB2	PERTUZUMAB	antibody|inhibitor	TALC|ClearityFoundationBiomarkers|MyCancerGenome|TdgClinicalTrial|JAX-CKB|ChemblInteractions|CIViC|PharmGKB|TTD|FDA|OncoKB	31453370|22586653|22149875|23801166|30857956|23940356|27052654|28539475|29320312|25693012|15093539
ERBB2	ERBB2	Definite	ERBB2	MUBRITINIB	inhibitor	MyCancerGenome|ChemblInteractions
ERBB2	ERBB2	Definite	ERBB2	BMS-690514	inhibitor	TALC|MyCancerGenome|JAX-CKB|ChemblInteractions	21531814
ERBB2	ERBB2	Definite	ERBB2	HEMAY-022	inhibitor	ChemblInteractions
ERBB2	ERBB2	Definite	ERBB2	TRASTUZUMAB	inhibitor|antibody	TALC|ClearityFoundationBiomarkers|MyCancerGenome|TdgClinicalTrial|ClearityFoundationClinicalTrial|JAX-CKB|ChemblInteractions|NCI|DoCM|CIViC|PharmGKB|TTD|FDA|OncoKB	27900589|26619011|20504363|16091755|31453370|17936563|22257673|19840887|2013|21676217|26759238|30452336|26598547|24470511|28784859|27140927|11248153|27108243|22908275|21107682|18555254|26880266|15236790|26296355|22149875|23801166|29523624|26469692|26874901|22850551|24691421|25601188|24606768|24982373|26104654|17660958|20728210|11098307|20975068|17679724|27626067|23948973|26099744|28167203|3085795…
ERBB2	ERBB2	Definite	ERBB2	CUDC-101	inhibitor	TALC|TdgClinicalTrial|JAX-CKB|ChemblInteractions|TTD	25107918
ERBB2	ERBB2	Definite	ERBB2	SAPITINIB	inhibitor	TALC|MyCancerGenome|JAX-CKB|ChemblInteractions|TTD	24886365
ERBB2	ERBB2	Definite	ERBB2	CANERTINIB	inhibitor	MyCancerGenome|JAX-CKB|TTD	16843263
ERBB2	ERBB2	Definite	ERBB2	AFATINIB	inhibitor	TALC|MyCancerGenome|TdgClinicalTrial|JAX-CKB|CIViC|MyCancerGenomeClinicalTrial	19122144|28274957|26545934|27044931|23632474|24971884|22325357|27923043|26296355|25589492|23775486|28363995|23578997|26964772|26559459|23948973|30096481|28167203|22418700|20142587|25370464|26243863|21617858|26596672
ERBB2	ERBB2	Definite	ERBB2	POZIOTINIB	inhibitor	JAX-CKB|ChemblInteractions|MyCancerGenomeClinicalTrial	21306821
ERBB2	ERBB2	Definite	ERBB2	S-222611	inhibitor	JAX-CKB|ChemblInteractions|TTD	24837299|25434923
ERBB2	ERBB2	Definite	ERBB2	DACOMITINIB	inhibitor	TALC|MyCancerGenome|TdgClinicalTrial|JAX-CKB|ChemblInteractions|CIViC|MyCancerGenomeClinicalTrial|TTD	22135232|18606718|25899785|22761403|28363995
ERBB2	ERBB2	Definite	ERBB2	ALLITINIB	inhibitor	ChemblInteractions
ERBB2	ERBB2	Definite	ERBB2	LAPATINIB	inhibitor|antagonist	TALC|DTC|ClearityFoundationBiomarkers|MyCancerGenome|TdgClinicalTrial|JAX-CKB|TEND|DoCM|CIViC|PharmGKB|TTD|FDA|OncoKB	26619011|25305330|17192538|20179222|16091755|27595477|12214266|24516025|22257673|20110044|18413839|27197158|27140927|15374980|26270481|27108243|22908275|24971884|14633707|22586653|27760111|26296355|26570998|2015169|18774637|27450453|24355130|16894399|27900369|23948973|14751502|27026198|23940356|25398453|24868024|26245675|19786658|26811533|11752352|14737100|18803986|23122784|25157968|15163842|2204…
ERBB2	ERBB2	Definite	ERBB2	JNJ-26483327	inhibitor	ChemblInteractions|TTD
ERBB2	ERBB2	Definite	ERBB2	CP-724714	inhibitor	ChemblInteractions|TTD
ERBB2	ERBB2	Definite	ERBB2	LAPATINIB DITOSYLATE	inhibitor	ChemblInteractions
ERBB2	ERBB2	Definite	ERBB2	NERATINIB	inhibitor	TALC|MyCancerGenome|TdgClinicalTrial|JAX-CKB|ChemblInteractions|DoCM|CIViC|MyCancerGenomeClinicalTrial|PharmGKB|TTD|FDA|OncoKB	26619011|28274957|24516025|28679771|23632474|22908275|24009064|29523624|26874901|23953056|28363995|26333383|27078022|28539475|22418700|29146401|20142587|25287822|24323026|25157968|22046346|23220880|16397024|27697991|26243863
ERBB2	ERBB2	Definite	ERBB2	MM-111	antibody	MyCancerGenome|TdgClinicalTrial|JAX-CKB|TTD
ERBB2	ERBB2	Definite	ERBB2	TUCATINIB	inhibitor	TALC|TdgClinicalTrial|JAX-CKB|TTD	32241871|28053022|29955792
ERBB2	ERBB2	Definite	ERBB2	PELITINIB	inhibitor	TALC|MyCancerGenome
ERBB2	ERBB2	Definite	ERBB2	TESEVATINIB	inhibitor	TALC|MyCancerGenome|TdgClinicalTrial|JAX-CKB|ChemblInteractions	18413839|19718025
ERBB2	ERBB2	Definite	ERBB2	TAK-285	inhibitor	JAX-CKB|ChemblInteractions|TTD	25594012|18441328|23983820
ERBB2	ERBB2	Definite	ERBB2	VARLITINIB	inhibitor	TdgClinicalTrial|JAX-CKB|ChemblInteractions|TTD
ERBB2	ERBB2	Definite	ERBB2	IBRUTINIB	inhibitor	JAX-CKB|CIViC	27256378|28830912
ERBB2	ERBB2	Definite	ERBB2	AEE-788	inhibitor	MyCancerGenome|JAX-CKB|ChemblInteractions	22046346
ERBB2	ERBB2	Definite	ERBB2	GEFITINIB	inhibitor	DTC|JAX-CKB|NCI|MyCancerGenomeClinicalTrial|PharmGKB	26545934|23220880|17638894|20151670|16818711
ERBB2	ERBB2	Definite	ERBB2	CANERTINIB DIHYDROCHLORIDE	inhibitor	ChemblInteractions
ERBB2	ERBB2	Definite	ERBB2	PYROTINIB	inhibitor	JAX-CKB|ChemblInteractions	28498781
ERBB2	ERBB2	Definite	ERBB2	AFATINIB DIMALEATE	inhibitor	ChemblInteractions
ERBB2	ERBB2	Definite	ERBB2	MP-412	inhibitor	TdgClinicalTrial|JAX-CKB|ChemblInteractions	17888033|19459856
ERBB2	ERBB2	Definite	ERBB2	VANDETANIB	inhibitor	ChemblInteractions
ERBB2	ERBB2	Definite	ERBB2	MARGETUXIMAB	inhibitor|antibody	TdgClinicalTrial|JAX-CKB|ChemblInteractions|TTD	28119295|22129105
ERBB2	ERBB2	Definite	ERBB2	TRASTUZUMAB EMTANSINE	inhibitor	ChemblInteractions
ERBB2	ERBB2	Definite	ERBB2	INSM-18	inhibitor	TdgClinicalTrial|ChemblInteractions
ERBB2	ERBB2	Definite	ERBB2	ENTINOSTAT		JAX-CKB
ERBB2	ERBB2	Definite	ERBB2	MASOPROCOL		TTD
ERBB2	ERBB2	Definite	ERBB2	FLOXURIDINE		NCI	17177846
ERBB2	ERBB2	Definite	ERBB2	ERIBULIN		PharmGKB|FDA
ERBB2	ERBB2	Definite	ERBB2	SIROLIMUS		CIViC	19122144
ERBB2	ERBB2	Definite	ERBB2	DOCETAXEL		JAX-CKB|CIViC|PharmGKB	30452336|22149875|23801166|27052654|25693012|30071039|25185099
ERBB2	ERBB2	Definite	ERBB2	PACLITAXEL		JAX-CKB|CIViC	24886365|26469692|27078022|24868024|27556950|26432108|29584549
ERBB2	ERBB2	Definite	ERBB2	ALISERTIB		DTC
ERBB2	ERBB2	Definite	ERBB2	SOTRASTAURIN		DTC
ERBB2	ERBB2	Definite	ERBB2	ERLOTINIB		DTC|JAX-CKB|PharmGKB	27900369
ERBB2	ERBB2	Definite	ERBB2	OSIMERTINIB		JAX-CKB	27252416
ERBB2	ERBB2	Definite	ERBB2	ELGEMTUMAB		JAX-CKB	28539475
ERBB2	ERBB2	Definite	ERBB2	PONATINIB		JAX-CKB	26270481
ERBB2	ERBB2	Definite	ERBB2	FIMEPINOSTAT		JAX-CKB	22693356
ERBB2	ERBB2	Definite	ERBB2	HERCEPTIN		NCI	17216002|15581051
ERBB2	ERBB2	Definite	ERBB2	METFORMIN		JAX-CKB	28375706
ERBB2	ERBB2	Definite	ERBB2	VINORELBINE		JAX-CKB	27992451|24742739
ERBB2	ERBB2	Definite	ERBB2	DASATINIB		DTC
ERBB2	ERBB2	Definite	ERBB2	EMODIN		NCI	9671406
ERBB2	ERBB2	Definite	ERBB2	TALAZOPARIB		PharmGKB|FDA
ERBB2	ERBB2	Definite	ERBB2	BUPARLISIB		JAX-CKB	24470511|23948973|23940356|28539475
ERBB2	ERBB2	Definite	ERBB2	ERTUMAXOMAB		ChemblInteractions|TTD
ERBB2	ERBB2	Definite	ERBB2	DOXORUBICIN		JAX-CKB
ERBB2	ERBB2	Definite	ERBB2	DIMETHYLCURCUMIN		DTC	25753330
ERBB2	ERBB2	Definite	ERBB2	PALBOCICLIB		JAX-CKB|PharmGKB|FDA	27020857|19874578|25221644
ERBB2	ERBB2	Definite	ERBB2	VISTUSERTIB		JAX-CKB	25805799
ERBB2	ERBB2	Definite	ERBB2	IXABEPILONE		PharmGKB|FDA
ERBB2	ERBB2	Definite	ERBB2	LAPULEUCEL-T		JAX-CKB
ERBB2	ERBB2	Definite	ERBB2	EVEROLIMUS		JAX-CKB|PharmGKB|FDA	21107682|20975068|24742739
ERBB2	ERBB2	Definite	ERBB2	CURCUMIN		DTC	25753330
ERBB2	ERBB2	Definite	ERBB2	T-DM1		JAX-CKB	27052654
ERBB2	ERBB2	Definite	ERBB2	MDX-210		ChemblInteractions
ERBB2	ERBB2	Definite	ERBB2	EPIGALOCATECHIN GALLATE		DTC	24456004
ERBB2	ERBB2	Definite	ERBB2	HYDROCORTISONE		NCI	7909787
ERBB2	ERBB2	Definite	ERBB2	IRINOTECAN		CIViC	25601188
ERBB2	ERBB2	Definite	ERBB2	NAKIJIQUINONE I		DTC	18676149
ERBB2	ERBB2	Definite	ERBB2	ABEMACICLIB		PharmGKB|FDA
ERBB2	ERBB2	Definite	ERBB2	CYCLOPHOSPHAMIDE		JAX-CKB
ERBB2	ERBB2	Definite	ERBB2	TRASTUZUMAB DUOCARMAZINE		JAX-CKB	25589493|27256376
ERBB2	ERBB2	Definite	ERBB2	CENISERTIB		DTC
ERBB2	ERBB2	Definite	ERBB2	TASELISIB		JAX-CKB	25172762|26333383
ERBB2	ERBB2	Definite	ERBB2	METHYLCURCUMIN		DTC	25753330
ERBB2	ERBB2	Definite	ERBB2	PA-799		JAX-CKB	21558396
ERBB2	ERBB2	Definite	ERBB2	GW843682X		DTC
ERBB2	ERBB2	Definite	ERBB2	AZD-8055		JAX-CKB	25436981
ERBB2	ERBB2	Definite	ERBB2	PKI-179		JAX-CKB	20797855
ERBB2	ERBB2	Definite	ERBB2	PANITUMUMAB		JAX-CKB	26243863
ERBB2	ERBB2	Definite	ERBB2	IRESSA		NCI	16470840
ERBB2	ERBB2	Definite	ERBB2	SORAFENIB		JAX-CKB	27992451
ERBB2	ERBB2	Definite	ERBB2	TRODUSQUEMINE		JAX-CKB	24845231
ERBB2	ERBB2	Definite	ERBB2	FLUOROURACIL		JAX-CKB	28784859|27626067|26432108
ERBB2	ERBB2	Definite	ERBB2	SERIBANTUMAB		JAX-CKB
ERBB2	ERBB2	Definite	ERBB2	LEUCOVORIN		JAX-CKB	28784859|27626067|26432108
ERBB2	ERBB2	Definite	ERBB2	ZENOCUTUZUMAB		TTD
ERBB2	ERBB2	Definite	ERBB2	IPATASERTIB		JAX-CKB	24141624
ERBB2	ERBB2	Definite	ERBB2	EXEMESTANE		JAX-CKB
ERBB2	ERBB2	Definite	ERBB2	CHLORAMBUCIL		NCI	11691913
ERBB2	ERBB2	Definite	ERBB2	ALPELISIB		PharmGKB|FDA
ERBB2	ERBB2	Definite	ERBB2	GO-6976		DTC
ERBB2	ERBB2	Definite	ERBB2	VS-5584		JAX-CKB	23270925
ERBB2	ERBB2	Definite	ERBB2	CRIZOTINIB		JAX-CKB	27595477|26432108
ERBB2	ERBB2	Definite	ERBB2	ILORASERTIB		DTC
ERBB2	ERBB2	Definite	ERBB2	ONARTUZUMAB		JAX-CKB	27918764
ERBB2	ERBB2	Definite	ERBB2	DIETHYLSTILBESTROL		NCI	14647453
ERBB2	ERBB2	Definite	ERBB2	TRIFLURIDINE		FDA
ERBB2	ERBB2	Definite	ERBB2	NAKIJIQUINONES G		DTC	18676149
ERBB2	ERBB2	Definite	ERBB2	LETROZOLE		JAX-CKB	19786658
ERBB2	ERBB2	Definite	ERBB2	EPIRUBICIN		NCI	11759828
ERBB2	ERBB2	Definite	ERBB2	AT-13148		JAX-CKB	22781553
ERBB2	ERBB2	Definite	ERBB2	MK-2206		JAX-CKB	2013|26104654|27026198|2605
ERBB2	ERBB2	Definite	ERBB2	RAMUCIRUMAB		JAX-CKB	25185099
ERBB2	ERBB2	Definite	ERBB2	PILARALISIB		JAX-CKB|CIViC	23948973|23204226
ERBB2	ERBB2	Definite	ERBB2	MEDI-4276		TTD
ERBB2	ERBB2	Definite	ERBB2	CHEMBL35482		NCI	10318905
ERBB2	ERBB2	Definite	ERBB2	CAPECITABINE		JAX-CKB|CIViC	20504363|17192538|17679724|19289619|25287822|26432108|26487584|26920887
ERBB2	ERBB2	Definite	ERBB2	GEDATOLISIB		JAX-CKB	17314276|21325073
ERBB2	ERBB2	Definite	ERBB2	DEPATUXIZUMAB MAFODOTIN		JAX-CKB	26846818
ERBB2	ERBB2	Definite	ERBB2	CI-1040		JAX-CKB	23948973
ERBB2	ERBB2	Definite	ERBB2	TIPIRACIL		FDA
ERBB2	ERBB2	Definite	ERBB2	R-406		DTC
ERBB2	ERBB2	Definite	ERBB2	COPANLISIB		JAX-CKB	24170767
ERBB2	ERBB2	Definite	ERBB2	RIBOCICLIB		PharmGKB|FDA
ERBB2	ERBB2	Definite	ERBB2	TEMSIROLIMUS		JAX-CKB	24323026
ERBB2	ERBB2	Definite	ERBB2	CEDIRANIB		DTC
ERBB2	ERBB2	Definite	ERBB2	TAMOXIFEN		NCI	11916237|15901136|17266042
ERBB2	ERBB2	Definite	ERBB2	GANCICLOVIR		NCI	8986436
ERBB2	ERBB2	Definite	ERBB2	TRASTUZUMAB DERUXTECAN		JAX-CKB	27026201
ERBB2	ERBB2	Definite	ERBB2	CETUXIMAB		JAX-CKB|CIViC	22586653|26296355|21900593|23948973|28223103|26243863
ERBB2	ERBB2	Definite	ERBB2	SUNITINIB		JAX-CKB	24606768
ERBB2	ERBB2	Definite	ERBB2	OLAPARIB		JAX-CKB|PharmGKB|FDA
ERBB2	ERBB2	Definite	ERBB2	ADO-TRASTUZUMAB EMTANSINE		TTD
ERBB2	ERBB2	Definite	ERBB2	OXALIPLATIN		JAX-CKB	28784859|26432108|24300914
ERBB2	ERBB2	Definite	ERBB2	TAE-684		DTC
ERBB2	ERBB2	Definite	ERBB2	ROMIDEPSIN		NCI	11929951
ERBB2	ERBB2	Definite	ERBB2	PICTILISIB		JAX-CKB|CIViC	27020857|22802530
ERBB2	ERBB2	Definite	ERBB2	URACIL		NCI	1682063
ERBB2	ERBB2	Definite	ERBB2	GEMCITABINE		JAX-CKB|NCI	15581051
ERBB2	ERBB2	Definite	ERBB2	CARBOPLATIN		CIViC|PharmGKB	30071039|29584549
ERBB2	ERBB2	Definite	ERBB2	ANTHRAQUINONE		NCI	16357514
ERBB2	ERBB2	Definite	ERBB2	GANCOTAMAB		JAX-CKB|ChemblInteractions|TTD	26759238
ERBB2	ERBB2	Definite	ERBB2	LIFIRAFENIB		JAX-CKB	26208524
ERBB2	ERBB2	Definite	ERBB2	TIVOZANIB		JAX-CKB	25995436
ERBB2	ERBB2	Definite	ERBB2	FILGRASTIM		NCI	16549824
ERBB2	ERBB2	Definite	ERBB2	FULVESTRANT		PharmGKB|FDA
ERBB2	ERBB2	Definite	ERBB2	RG-4733		JAX-CKB	27556950
ERBB2	ERBB2	Definite	ERBB2	PLUMBAGIN		DTC	24355130
ERBB2	ERBB2	Definite	ERBB2	BEVACIZUMAB		JAX-CKB	23940356|26432108
ERBB2	ERBB2	Definite	ERBB2	NAKIJIQUINONES H		DTC	18676149
ERBB2	ERBB2	Definite	ERBB2	CISPLATIN		JAX-CKB
ERBB2	ERBB2	Definite	ERBB2	SELUMETINIB		JAX-CKB	24971884
KLF4	KLF4	Definite	KLF4	APTO-253		TTD
TGFA	TGFA	Definite	TGFA	PANITUMUMAB		PharmGKB
TGFA	TGFA	Definite	TGFA	CETUXIMAB		PharmGKB
ESR1	ESR1	Definite	ESR1	IDOXIFENE	modulator	ChemblInteractions
ESR1	ESR1	Definite	ESR1	ESTRONE	agonist	DTC|TdgClinicalTrial|ChemblInteractions|TEND|TTD	2011412|12547192|11752352
ESR1	ESR1	Definite	ESR1	DIENESTROL	agonist	DTC|TdgClinicalTrial|ChemblInteractions|TEND|TTD	15276617|3622377|9048584|9558716|11752352|3334987|18976723
ESR1	ESR1	Definite	ESR1	ACOLBIFENE	modulator	ChemblInteractions|TTD
ESR1	ESR1	Definite	ESR1	OSPEMIFENE	modulator|antagonist|agonist	TdgClinicalTrial|ChemblInteractions|TTD	15255284|16153821
ESR1	ESR1	Definite	ESR1	ESTRADIOL ACETATE	agonist	ChemblInteractions
ESR1	ESR1	Definite	ESR1	MK-6913	agonist	TdgClinicalTrial|ChemblInteractions
ESR1	ESR1	Definite	ESR1	DIETHYLSTILBESTROL	agonist	DTC|TdgClinicalTrial|ChemblInteractions|TEND|TTD	17320868|26408814|17317669|17308373|17306201|11752352|20387803|17314305
ESR1	ESR1	Definite	ESR1	ESTROGENS, CONJUGATED SYNTHETIC A	agonist	ChemblInteractions
ESR1	ESR1	Definite	ESR1	ESTRADIOL	agonist	DTC|TdgClinicalTrial|ChemblInteractions|TEND|TTD	20334368|20659801|17138652|25879485|16038533|23884115|2011412|11752352|17125913|16520733|24971815|19561619|24805199
ESR1	ESR1	Definite	ESR1	SR16234	antagonist	TdgClinicalTrial|ChemblInteractions
ESR1	ESR1	Definite	ESR1	ETHINYL ESTRADIOL	agonist	ChemblInteractions	17124377|19434891|17095591|17138652|19237207|11752352|17125913|17142999
ESR1	ESR1	Definite	ESR1	QUINESTROL	agonist|modulator	TdgClinicalTrial|ChemblInteractions|TEND|TTD	11752352|17139284|17016423|21075131
ESR1	ESR1	Definite	ESR1	BAZEDOXIFENE	antagonist|agonist	TdgClinicalTrial|TTD	15535430
ESR1	ESR1	Definite	ESR1	FULVESTRANT	antagonist	TALC|DTC|TdgClinicalTrial|ChemblInteractions|TEND|CIViC|PharmGKB|TTD|FDA|OncoKB	20151846|24185512|19133777|26407012|15018596|25879485|12542403|15865850|11922402|12113237|17337183|17275315|19845386|11398912|12080538|24185510|11752352|20621492
ESR1	ESR1	Definite	ESR1	ESTRADIOL CYPIONATE	agonist	ChemblInteractions
ESR1	ESR1	Definite	ESR1	GTX-758	agonist	ChemblInteractions|TTD
ESR1	ESR1	Definite	ESR1	CHLOROTRIANISENE	agonist	DTC|TdgClinicalTrial|TEND|TTD	6872937|17236558|11752352|2307235
ESR1	ESR1	Definite	ESR1	ESTROGENS, CONJUGATED	agonist	ChemblInteractions
ESR1	ESR1	Definite	ESR1	ESTROGENS, ESTERIFIED	agonist	ChemblInteractions
ESR1	ESR1	Definite	ESR1	ESTRIOL	agonist	TdgClinicalTrial|TEND|TTD	2011412|11752352
ESR1	ESR1	Definite	ESR1	TAMOXIFEN	antagonist|agonist	DTC|ClearityFoundationBiomarkers|TdgClinicalTrial|ClearityFoundationClinicalTrial|TEND|CIViC|PharmGKB|TTD|FDA	24398047|24185512|20659801|20512796|11906441|2011412|24185510|11752352|16735120|17713466|20621492
ESR1	ESR1	Definite	ESR1	TOREMIFENE CITRATE	modulator	ChemblInteractions
ESR1	ESR1	Definite	ESR1	CLOMIPHENE CITRATE	modulator	ChemblInteractions
ESR1	ESR1	Definite	ESR1	CLOMIPHENE	antagonist|agonist	TdgClinicalTrial|TEND|TTD	19761360|18320435|19821295|20379036|20091498|2011412|17055820|15878925|11752352
ESR1	ESR1	Definite	ESR1	DROLOXIFENE	modulator	ChemblInteractions
ESR1	ESR1	Definite	ESR1	DIETHYLSTILBESTROL DIPHOSPHATE	agonist	ChemblInteractions|TTD
ESR1	ESR1	Definite	ESR1	BAZEDOXIFENE ACETATE	modulator	ChemblInteractions
ESR1	ESR1	Definite	ESR1	LASOFOXIFENE	agonist|antagonist|negative modulator	TdgClinicalTrial|TTD	17456742
ESR1	ESR1	Definite	ESR1	PROGESTERONE	agonist|inhibitor|negative modulator	TdgClinicalTrial|TEND	26153859|17103262|17203775|17118173|19094096|17341305|17415709|11014241
ESR1	ESR1	Definite	ESR1	BRILANESTRANT	antagonist	ChemblInteractions|TTD
ESR1	ESR1	Definite	ESR1	MESTRANOL	agonist	TdgClinicalTrial|ChemblInteractions|TEND|TTD	20497523|20524981|11752352
ESR1	ESR1	Definite	ESR1	SYNTHETIC CONJUGATED ESTROGENS, B	agonist	ChemblInteractions
ESR1	ESR1	Definite	ESR1	RALOXIFENE	agonist|antagonist	DTC|TdgClinicalTrial|TEND|PharmGKB|TTD|FDA	10477535|20659801|16951478|10507743|10376571|10418979|27546373|10485477|10068418|18778124|11752352
ESR1	ESR1	Definite	ESR1	DANAZOL	agonist	DTC|TdgClinicalTrial|TEND|TTD	7540578|4039467|11752352|2326286
ESR1	ESR1	Definite	ESR1	ETONOGESTREL	agonist	TdgClinicalTrial|TEND	17139284|17016423
ESR1	ESR1	Definite	ESR1	ESTROPIPATE	agonist	ChemblInteractions|TTD	17138652|2011412|11752352|17125913
ESR1	ESR1	Definite	ESR1	ESTRADIOL VALERATE	agonist	ChemblInteractions
ESR1	ESR1	Definite	ESR1	PROPYLPYRAZOLETRIOL	agonist	DTC
ESR1	ESR1	Definite	ESR1	AFIMOXIFENE	modulator	DTC|ChemblInteractions|TTD	20334368|15846122|24805199
ESR1	ESR1	Definite	ESR1	NORGESTIMATE	agonist	TdgClinicalTrial|TEND	14672731|25970022|2175153|14670645
ESR1	ESR1	Definite	ESR1	FISPEMIFENE	modulator	TdgClinicalTrial|ChemblInteractions
ESR1	ESR1	Definite	ESR1	LY2245461	modulator	ChemblInteractions
ESR1	ESR1	Definite	ESR1	TOREMIFENE	modulator	TdgClinicalTrial|TEND|PharmGKB|TTD|FDA	12870885|16595024|11747628|17503894|18279543|17062721|11752352|15369444|16515478|16503765|16917142
ESR1	ESR1	Definite	ESR1	CENESTIN	ligand	TTD
ESR1	ESR1	Definite	ESR1	DESOGESTREL	agonist	TdgClinicalTrial|TEND	10836199|7750284|2175153
ESR1	ESR1	Definite	ESR1	POLYESTRADIOL PHOSPHATE	agonist	ChemblInteractions
ESR1	ESR1	Definite	ESR1	TAMOXIFEN CITRATE	modulator	DTC|ChemblInteractions
ESR1	ESR1	Definite	ESR1	CHF4227	modulator	ChemblInteractions|TTD
ESR1	ESR1	Definite	ESR1	LEVONORGESTREL	other/unknown	TdgClinicalTrial|TEND	12589940|16325240|17634204|16609013|16307966|21791876|1562565|16084894
ESR1	ESR1	Definite	ESR1	PHENOLPHTHALEIN	agonist	DTC	3620717
ESR1	ESR1	Definite	ESR1	TESTOSTERONE	inhibitor	DTC	16038533|10973921|12676605
ESR1	ESR1	Definite	ESR1	GESTRINONE	agonist|antagonist	TTD
ESR1	ESR1	Definite	ESR1	RAD1901		TdgClinicalTrial|ChemblInteractions
ESR1	ESR1	Definite	ESR1	ZERANOL		DTC	19913605
ESR1	ESR1	Definite	ESR1	PROMESTRIENE		TTD
ESR1	ESR1	Definite	ESR1	EVEROLIMUS		PharmGKB|FDA
ESR1	ESR1	Definite	ESR1	ANASTROZOLE		ClearityFoundationBiomarkers|PharmGKB|FDA
ESR1	ESR1	Definite	ESR1	ORTHOTOLIDINE		DTC
ESR1	ESR1	Definite	ESR1	PROPACHLOR		DTC
ESR1	ESR1	Definite	ESR1	MITOTANE		TTD	14579009
ESR1	ESR1	Definite	ESR1	ARSANILIC ACID		DTC
ESR1	ESR1	Definite	ESR1	CHEMBL2313444		DTC	23214428
ESR1	ESR1	Definite	ESR1	HYDRAMETHYLNON		DTC
ESR1	ESR1	Definite	ESR1	PROTOAPIGENONE		DTC	16038533
ESR1	ESR1	Definite	ESR1	GUGGULSTERONE		DTC
ESR1	ESR1	Definite	ESR1	IXABEPILONE		PharmGKB|FDA
ESR1	ESR1	Definite	ESR1	KEPONE		DTC
ESR1	ESR1	Definite	ESR1	ICARITIN		TTD
ESR1	ESR1	Definite	ESR1	ENDOXIFEN		DTC|ClearityFoundationClinicalTrial|TTD	24805199
ESR1	ESR1	Definite	ESR1	PHENAZOPYRIDINE HYDROCHLORIDE		DTC
ESR1	ESR1	Definite	ESR1	APIGENIN		DTC
ESR1	ESR1	Definite	ESR1	NORGESTREL		TdgClinicalTrial|TEND
ESR1	ESR1	Definite	ESR1	BORIC ACID		DTC
ESR1	ESR1	Definite	ESR1	CHEMBL1432305		DTC
ESR1	ESR1	Definite	ESR1	4-METHYLBENZOIC ACID METHYL ESTER		DTC
ESR1	ESR1	Definite	ESR1	OXYMETHOLONE		DTC
ESR1	ESR1	Definite	ESR1	STANOLONE		DTC	12676605
ESR1	ESR1	Definite	ESR1	ACRYLAMIDE		DTC
ESR1	ESR1	Definite	ESR1	CETRIMONIUM BROMIDE		DTC
ESR1	ESR1	Definite	ESR1	GENTIAN VIOLET		DTC
ESR1	ESR1	Definite	ESR1	CHEMBL384441		DTC
ESR1	ESR1	Definite	ESR1	CUMENE HYDROPEROXIDE		DTC
ESR1	ESR1	Definite	ESR1	LEFLUNOMIDE		PharmGKB	21174621
ESR1	ESR1	Definite	ESR1	DOCETAXEL		PharmGKB|FDA
ESR1	ESR1	Definite	ESR1	DOXYCYCLINE		PharmGKB	24185512
ESR1	ESR1	Definite	ESR1	PALMITIC ACID		DTC
ESR1	ESR1	Definite	ESR1	KAEMPFEROL		DTC
ESR1	ESR1	Definite	ESR1	CHEMBL221047		DTC	17432842
ESR1	ESR1	Definite	ESR1	ARZOXIFENE		TdgClinicalTrial|TTD
ESR1	ESR1	Definite	ESR1	DOXORUBICIN HYDROCHLORIDE		DTC
ESR1	ESR1	Definite	ESR1	GENISTEIN		DTC	16038533|10592235
ESR1	ESR1	Definite	ESR1	ABEMACICLIB		PharmGKB|FDA
ESR1	ESR1	Definite	ESR1	TESTOSTERONE PROPIONATE		DTC
ESR1	ESR1	Definite	ESR1	TRIAMTERENE		DTC
ESR1	ESR1	Definite	ESR1	N-PROPYL BROMIDE		DTC
ESR1	ESR1	Definite	ESR1	ACETOCHLOR		DTC
ESR1	ESR1	Definite	ESR1	CATECHOL		DTC
ESR1	ESR1	Definite	ESR1	CHEMBL195515		DTC	20334372
ESR1	ESR1	Definite	ESR1	DAUNORUBICIN HYDROCHLORIDE		DTC
ESR1	ESR1	Definite	ESR1	NORELGESTROMIN		TdgClinicalTrial
ESR1	ESR1	Definite	ESR1	PALBOCICLIB		CIViC|PharmGKB|FDA	25524798
ESR1	ESR1	Definite	ESR1	VINTAFOLIDE		ClearityFoundationClinicalTrial
ESR1	ESR1	Definite	ESR1	DOMIPHEN BROMIDE		DTC
ESR1	ESR1	Definite	ESR1	CHEMBL259327		DTC
ESR1	ESR1	Definite	ESR1	CHEMBL2313445		DTC	23214428
ESR1	ESR1	Definite	ESR1	DIENOGEST		TdgClinicalTrial
ESR1	ESR1	Definite	ESR1	GOSSYPOL		DTC
ESR1	ESR1	Definite	ESR1	ALACHLOR		DTC
ESR1	ESR1	Definite	ESR1	METHOXSALEN		DTC
ESR1	ESR1	Definite	ESR1	CHEMBL1579130		DTC
ESR1	ESR1	Definite	ESR1	CHEMBL1523215		DTC
ESR1	ESR1	Definite	ESR1	PHENYLALANINE		DTC
ESR1	ESR1	Definite	ESR1	OLAPARIB		PharmGKB|FDA
ESR1	ESR1	Definite	ESR1	PROPYLPARABEN		DTC
ESR1	ESR1	Definite	ESR1	CISPLATIN		PharmGKB	21430602
ESR1	ESR1	Definite	ESR1	CHLORANIL		DTC
ESR1	ESR1	Definite	ESR1	RALOXIFEN		TdgClinicalTrial
ESR1	ESR1	Definite	ESR1	DIETHYLSTILBESTROL DIPROPIONATE		DTC
ESR1	ESR1	Definite	ESR1	ZIRAM		DTC
ESR1	ESR1	Definite	ESR1	PERTUZUMAB		PharmGKB|FDA
ESR1	ESR1	Definite	ESR1	NORDIHYDROGUAIARETIC ACID		DTC
ESR1	ESR1	Definite	ESR1	DICHLOROPHEN		DTC
ESR1	ESR1	Definite	ESR1	PENTABROMOPHENOL		DTC
ESR1	ESR1	Definite	ESR1	CHEMBL503990		DTC
ESR1	ESR1	Definite	ESR1	RETINOL		DTC
ESR1	ESR1	Definite	ESR1	AZD-9496		TTD|OncoKB
ESR1	ESR1	Definite	ESR1	CHEMBL354663		DTC
ESR1	ESR1	Definite	ESR1	ZEARALENONE		DTC
ESR1	ESR1	Definite	ESR1	CADMIUM DICHLORIDE		DTC
ESR1	ESR1	Definite	ESR1	PUERARIN		DTC	16038533
[truncated: 1,326 more rows]

## Sheet: Table_S2
pathway	comp	group1.samples	group1.cells	group2.samples	group2.cells	mean1	mean2	log.method	log2fc	fc	lrt.term	lrt.X.Df	lrt.LogLik	lrt.df	lrt.statistic	lrt.p.value	lrt.p.adj
FGF2	cold vs. hot	MEEI20_Primary MEEI6_Primary MEEI17_Primary	330 321 123	MEEI25_Primary MEEI18_Primary	140 113	0.547046	0.303255	log2	0.243791	1.1841	path.score ~ 0 + (1 | tumor_name)	2	-321.639	-2	19.6887	5.3e-05	0.000782425
AHR	cold vs. hot	MEEI20_Primary MEEI6_Primary MEEI17_Primary	330 321 123	MEEI25_Primary MEEI18_Primary	140 113	0.501869	0.155739	log2	0.346129	1.27115	path.score ~ 0 + (1 | tumor_name)	2	-128.181	-2	20.1758	4.16e-05	0.000782425
MAP2K1_2	cold vs. hot	MEEI20_Primary MEEI6_Primary MEEI17_Primary	330 321 123	MEEI25_Primary MEEI18_Primary	140 113	0.294192	0.344589	log2	-0.0503969	-1.03555	path.score ~ 0 + (1 | tumor_name)	2	-687.853	-2	19.696	5.29e-05	0.000782425
PRKCD	cold vs. hot	MEEI20_Primary MEEI6_Primary MEEI17_Primary	330 321 123	MEEI25_Primary MEEI18_Primary	140 113	0.353063	0.475548	log2	-0.122485	-1.08861	path.score ~ 0 + (1 | tumor_name)	2	-510.535	-2	21.8734	1.78e-05	0.000782425
Mek	cold vs. hot	MEEI20_Primary MEEI6_Primary MEEI17_Primary	330 321 123	MEEI25_Primary MEEI18_Primary	140 113	0.363702	0.2283	log2	0.135402	1.0984	path.score ~ 0 + (1 | tumor_name)	2	-593.379	-2	18.2195	0.000110581	0.00130485
EGR1	cold vs. hot	MEEI20_Primary MEEI6_Primary MEEI17_Primary	330 321 123	MEEI25_Primary MEEI18_Primary	140 113	0.315141	0.264734	log2	0.0504073	1.03556	path.score ~ 0 + (1 | tumor_name)	2	-482.989	-2	17.5877	0.000151665	0.00149138
ERK	cold vs. hot	MEEI20_Primary MEEI6_Primary MEEI17_Primary	330 321 123	MEEI25_Primary MEEI18_Primary	140 113	0.438242	0.356275	log2	0.0819667	1.05846	path.score ~ 0 + (1 | tumor_name)	2	-463.412	-2	16.593	0.000249392	0.00183927
EPAS1	cold vs. hot	MEEI20_Primary MEEI6_Primary MEEI17_Primary	330 321 123	MEEI25_Primary MEEI18_Primary	140 113	0.43838	0.278655	log2	0.159725	1.11707	path.score ~ 0 + (1 | tumor_name)	2	-163.853	-2	16.6582	0.00024139	0.00183927
HIF1A	cold vs. hot	MEEI20_Primary MEEI6_Primary MEEI17_Primary	330 321 123	MEEI25_Primary MEEI18_Primary	140 113	0.456993	0.154179	log2	0.302813	1.23355	path.score ~ 0 + (1 | tumor_name)	2	-263.282	-2	16.1175	0.000316317	0.00207363
FSH	cold vs. hot	MEEI20_Primary MEEI6_Primary MEEI17_Primary	330 321 123	MEEI25_Primary MEEI18_Primary	140 113	0.339306	0.206587	log2	0.132719	1.09636	path.score ~ 0 + (1 | tumor_name)	2	-150.127	-2	15.5754	0.000414808	0.00222488
Pkc_s_	cold vs. hot	MEEI20_Primary MEEI6_Primary MEEI17_Primary	330 321 123	MEEI25_Primary MEEI18_Primary	140 113	0.490293	0.295365	log2	0.194928	1.14467	path.score ~ 0 + (1 | tumor_name)	2	-352.153	-2	15.7356	0.000382881	0.00222488
Creb	cold vs. hot	MEEI20_Primary MEEI6_Primary MEEI17_Primary	330 321 123	MEEI25_Primary MEEI18_Primary	140 113	0.447868	0.068909	log2	0.378959	1.3004	path.score ~ 0 + (1 | tumor_name)	2	-357.072	-2	15.3347	0.000467854	0.00230028
TNF	cold vs. hot	MEEI20_Primary MEEI6_Primary MEEI17_Primary	330 321 123	MEEI25_Primary MEEI18_Primary	140 113	0.503899	0.384843	log2	0.119055	1.08602	path.score ~ 0 + (1 | tumor_name)	2	0.739492	-2	14.9611	0.00056396	0.00255951
EGF	cold vs. hot	MEEI20_Primary MEEI6_Primary MEEI17_Primary	330 321 123	MEEI25_Primary MEEI18_Primary	140 113	0.356953	0.303378	log2	0.0535746	1.03783	path.score ~ 0 + (1 | tumor_name)	2	-421.06	-2	13.7615	0.0010274	0.00356568
PDGF_BB	cold vs. hot	MEEI20_Primary MEEI6_Primary MEEI17_Primary	330 321 123	MEEI25_Primary MEEI18_Primary	140 113	0.270752	0.116881	log2	0.15387	1.11255	path.score ~ 0 + (1 | tumor_name)	2	-501.721	-2	14.0698	0.000880595	0.00356568
P38_MAPK	cold vs. hot	MEEI20_Primary MEEI6_Primary MEEI17_Primary	330 321 123	MEEI25_Primary MEEI18_Primary	140 113	0.349562	0.00970742	log2	0.339855	1.26563	path.score ~ 0 + (1 | tumor_name)	2	-342.222	-2	13.961	0.000929854	0.00356568
ARNT	cold vs. hot	MEEI20_Primary MEEI6_Primary MEEI17_Primary	330 321 123	MEEI25_Primary MEEI18_Primary	140 113	0.646021	0.200117	log2	0.445905	1.36217	path.score ~ 0 + (1 | tumor_name)	2	-362.289	-2	13.8623	0.000976853	0.00356568
JUN	cold vs. hot	MEEI20_Primary MEEI6_Primary MEEI17_Primary	330 321 123	MEEI25_Primary MEEI18_Primary	140 113	0.323709	0.220157	log2	0.103551	1.07442	path.score ~ 0 + (1 | tumor_name)	2	-191.808	-2	13.5953	0.00111641	0.00365934
PLG	cold vs. hot	MEEI20_Primary MEEI6_Primary MEEI17_Primary	330 321 123	MEEI25_Primary MEEI18_Primary	140 113	0.536688	0.0223361	log2	0.514352	1.42835	path.score ~ 0 + (1 | tumor_name)	2	-700.68	-2	12.7515	0.00170238	0.00528635
SP1	cold vs. hot	MEEI20_Primary MEEI6_Primary MEEI17_Primary	330 321 123	MEEI25_Primary MEEI18_Primary	140 113	0.26992	0.0828984	log2	0.187022	1.13841	path.score ~ 0 + (1 | tumor_name)	2	-141.37	-2	12.1477	0.00230225	0.00679164
F7	cold vs. hot	MEEI20_Primary MEEI6_Primary MEEI17_Primary	330 321 123	MEEI25_Primary MEEI18_Primary	140 113	0.405927	0.407663	log2	-0.00173582	-1.0012	path.score ~ 0 + (1 | tumor_name)	2	-856.872	-2	11.7869	0.00275741	0.00739488
PGR	cold vs. hot	MEEI20_Primary MEEI6_Primary MEEI17_Primary	330 321 123	MEEI25_Primary MEEI18_Primary	140 113	0.569608	0.256692	log2	0.312916	1.24222	path.score ~ 0 + (1 | tumor_name)	2	-295.669	-2	11.7957	0.00274532	0.00739488
SMARCA4	cold vs. hot	MEEI20_Primary MEEI6_Primary MEEI17_Primary	330 321 123	MEEI25_Primary MEEI18_Primary	140 113	0.316674	0.255177	log2	0.0614974	1.04355	path.score ~ 0 + (1 | tumor_name)	2	-64.3022	-2	11.2114	0.00367679	0.00904314
CG	cold vs. hot	MEEI20_Primary MEEI6_Primary MEEI17_Primary	330 321 123	MEEI25_Primary MEEI18_Primary	140 113	0.470478	0.253761	log2	0.216717	1.16209	path.score ~ 0 + (1 | tumor_name)	2	-75.2282	-2	11.2105	0.00367856	0.00904314
ELK1	cold vs. hot	MEEI20_Primary MEEI6_Primary MEEI17_Primary	330 321 123	MEEI25_Primary MEEI18_Primary	140 113	0.745656	0.373961	log2	0.371695	1.29387	path.score ~ 0 + (1 | tumor_name)	2	-676.255	-2	11.0016	0.00408356	0.00963721
MYC	cold vs. hot	MEEI20_Primary MEEI6_Primary MEEI17_Primary	330 321 123	MEEI25_Primary MEEI18_Primary	140 113	0.537696	0.214292	log2	0.323404	1.25128	path.score ~ 0 + (1 | tumor_name)	2	-18.2511	-2	10.6586	0.00484747	0.011
PI3K__complex_	cold vs. hot	MEEI20_Primary MEEI6_Primary MEEI17_Primary	330 321 123	MEEI25_Primary MEEI18_Primary	140 113	0.499475	0.123854	log2	0.375622	1.2974	path.score ~ 0 + (1 | tumor_name)	2	-384.081	-2	10.5504	0.00511699	0.0111816
ERBB2	cold vs. hot	MEEI20_Primary MEEI6_Primary MEEI17_Primary	330 321 123	MEEI25_Primary MEEI18_Primary	140 113	0.461196	0.347293	log2	0.113903	1.08215	path.score ~ 0 + (1 | tumor_name)	2	-92.5269	-2	10.4118	0.00548421	0.011556
KLF4	cold vs. hot	MEEI20_Primary MEEI6_Primary MEEI17_Primary	330 321 123	MEEI25_Primary MEEI18_Primary	140 113	0.42825	0.359183	log2	0.0690666	1.04904	path.score ~ 0 + (1 | tumor_name)	2	-265.494	-2	9.89264	0.00710951	0.013531
TGFA	cold vs. hot	MEEI20_Primary MEEI6_Primary MEEI17_Primary	330 321 123	MEEI25_Primary MEEI18_Primary	140 113	0.284075	0.152003	log2	0.132072	1.09587	path.score ~ 0 + (1 | tumor_name)	2	-554.089	-2	9.96275	0.00686462	0.013531
PI3K__family_	cold vs. hot	MEEI20_Primary MEEI6_Primary MEEI17_Primary	330 321 123	MEEI25_Primary MEEI18_Primary	140 113	0.731317	0.0441439	log2	0.687173	1.61013	path.score ~ 0 + (1 | tumor_name)	2	-149.295	-2	9.94606	0.00692216	0.013531
ESR1	cold vs. hot	MEEI20_Primary MEEI6_Primary MEEI17_Primary	330 321 123	MEEI25_Primary MEEI18_Primary	140 113	0.377136	0.194378	log2	0.182759	1.13505	path.score ~ 0 + (1 | tumor_name)	2	28.6561	-2	9.82835	0.00734177	0.0135364
Lh	cold vs. hot	MEEI20_Primary MEEI6_Primary MEEI17_Primary	330 321 123	MEEI25_Primary MEEI18_Primary	140 113	0.280265	0.153743	log2	0.126522	1.09166	path.score ~ 0 + (1 | tumor_name)	2	-347.512	-2	9.62397	0.00813172	0.0145385
PAX7	cold vs. hot	MEEI20_Primary MEEI6_Primary MEEI17_Primary	330 321 123	MEEI25_Primary MEEI18_Primary	140 113	0.380027	0.527941	log2	-0.147914	-1.10797	path.score ~ 0 + (1 | tumor_name)	2	-625.533	-2	9.28789	0.00961969	0.016693
CD38	cold vs. hot	MEEI20_Primary MEEI6_Primary MEEI17_Primary	330 321 123	MEEI25_Primary MEEI18_Primary	140 113	0.586452	0.101061	log2	0.485391	1.39997	path.score ~ 0 + (1 | tumor_name)	2	-590.479	-2	9.16042	0.0102528	0.0172832
IL5	cold vs. hot	MEEI20_Primary MEEI6_Primary MEEI17_Primary	330 321 123	MEEI25_Primary MEEI18_Primary	140 113	0.566141	0.153589	log2	0.412553	1.33104	path.score ~ 0 + (1 | tumor_name)	2	-529.195	-2	8.98777	0.0111771	0.0183181
SYVN1	cold vs. hot	MEEI20_Primary MEEI6_Primary MEEI17_Primary	330 321 123	MEEI25_Primary MEEI18_Primary	140 113	0.461367	0.473238	log2	-0.0118714	-1.00826	path.score ~ 0 + (1 | tumor_name)	2	-333.273	-2	8.69226	0.0129568	0.0206609
JAK1_2	cold vs. hot	MEEI20_Primary MEEI6_Primary MEEI17_Primary	330 321 123	MEEI25_Primary MEEI18_Primary	140 113	0.342491	0.0711072	log2	0.271384	1.20697	path.score ~ 0 + (1 | tumor_name)	2	-706.708	-2	8.48021	0.0144061	0.0223673
EHMT1	cold vs. hot	MEEI20_Primary MEEI6_Primary MEEI17_Primary	330 321 123	MEEI25_Primary MEEI18_Primary	140 113	0.279565	0.38941	log2	-0.109845	-1.07911	path.score ~ 0 + (1 | tumor_name)	2	-739.199	-2	7.84239	0.0198174	0.0299801
PTH	cold vs. hot	MEEI20_Primary MEEI6_Primary MEEI17_Primary	330 321 123	MEEI25_Primary MEEI18_Primary	140 113	0.12542	0.33978	log2	-0.21436	-1.16019	path.score ~ 0 + (1 | tumor_name)	2	-658.484	-2	7.06604	0.0292166	0.0430945
CTNNB1	cold vs. hot	MEEI20_Primary MEEI6_Primary MEEI17_Primary	330 321 123	MEEI25_Primary MEEI18_Primary	140 113	0.400574	0.0373945	log2	0.36318	1.28626	path.score ~ 0 + (1 | tumor_name)	2	-54.3228	-2	6.99589	0.0302595	0.0435442
SMAD3	cold vs. hot	MEEI20_Primary MEEI6_Primary MEEI17_Primary	330 321 123	MEEI25_Primary MEEI18_Primary	140 113	0.339038	0.158371	log2	0.180668	1.13341	path.score ~ 0 + (1 | tumor_name)	2	-585.745	-2	6.17748	0.0455594	0.0640001
NFE2L2	cold vs. hot	MEEI20_Primary MEEI6_Primary MEEI17_Primary	330 321 123	MEEI25_Primary MEEI18_Primary	140 113	0.642266	-0.0476418	log2	0.689908	1.61318	path.score ~ 0 + (1 | tumor_name)	2	44.7557	-2	6.04568	0.0486629	0.06677
SOX2	cold vs. hot	MEEI20_Primary MEEI6_Primary MEEI17_Primary	330 321 123	MEEI25_Primary MEEI18_Primary	140 113	0.406616	0.164761	log2	0.241856	1.18251	path.score ~ 0 + (1 | tumor_name)	2	20.561	-2	5.94976	0.0510535	0.0684581
CREM	cold vs. hot	MEEI20_Primary MEEI6_Primary MEEI17_Primary	330 321 123	MEEI25_Primary MEEI18_Primary	140 113	0.275416	0.1207	log2	0.154716	1.1132	path.score ~ 0 + (1 | tumor_name)	2	-537.787	-2	5.24118	0.0727598	0.0953277
SREBF2	cold vs. hot	MEEI20_Primary MEEI6_Primary MEEI17_Primary	330 321 123	MEEI25_Primary MEEI18_Primary	140 113	0.560289	-0.152534	log2	0.712822	1.63901	path.score ~ 0 + (1 | tumor_name)	2	-665.794	-2	5.1947	0.0744706	0.0953277
RPTOR	cold vs. hot	MEEI20_Primary MEEI6_Primary MEEI17_Primary	330 321 123	MEEI25_Primary MEEI18_Primary	140 113	0.684719	-0.0709273	log2	0.755647	1.68839	path.score ~ 0 + (1 | tumor_name)	2	-709.544	-2	5.15565	0.075939	0.0953277
MAP2K1	cold vs. hot	MEEI20_Primary MEEI6_Primary MEEI17_Primary	330 321 123	MEEI25_Primary MEEI18_Primary	140 113	0.202135	0.255466	log2	-0.0533316	-1.03766	path.score ~ 0 + (1 | tumor_name)	2	-749.709	-2	5.01842	0.0813324	0.0991075
SCAP	cold vs. hot	MEEI20_Primary MEEI6_Primary MEEI17_Primary	330 321 123	MEEI25_Primary MEEI18_Primary	140 113	0.415408	-0.0754832	log2	0.490891	1.40531	path.score ~ 0 + (1 | tumor_name)	2	-532.662	-2	4.99454	0.0823096	0.0991075
SREBF1	cold vs. hot	MEEI20_Primary MEEI6_Primary MEEI17_Primary	330 321 123	MEEI25_Primary MEEI18_Primary	140 113	0.453034	-0.0742233	log2	0.527257	1.44119	path.score ~ 0 + (1 | tumor_name)	2	-516.048	-2	4.93453	0.0848164	0.100083
FOXA2	cold vs. hot	MEEI20_Primary MEEI6_Primary MEEI17_Primary	330 321 123	MEEI25_Primary MEEI18_Primary	140 113	0.339508	0.073758	log2	0.26575	1.20226	path.score ~ 0 + (1 | tumor_name)	2	-444.235	-2	4.78181	0.091547	0.105892
RELA	cold vs. hot	MEEI20_Primary MEEI6_Primary MEEI17_Primary	330 321 123	MEEI25_Primary MEEI18_Primary	140 113	0.423334	0.211519	log2	0.211815	1.15814	path.score ~ 0 + (1 | tumor_name)	2	-323.116	-2	4.74326	0.0933283	0.105892
IKBKE	cold vs. hot	MEEI20_Primary MEEI6_Primary MEEI17_Primary	330 321 123	MEEI25_Primary MEEI18_Primary	140 113	0.456022	0.0563833	log2	0.399639	1.31918	path.score ~ 0 + (1 | tumor_name)	2	-655.084	-2	4.62053	0.0992352	0.110469
GLI1	cold vs. hot	MEEI20_Primary MEEI6_Primary MEEI17_Primary	330 321 123	MEEI25_Primary MEEI18_Primary	140 113	0.529511	0.240546	log2	0.288965	1.22176	path.score ~ 0 + (1 | tumor_name)	2	-534.116	-2	4.43773	0.108733	0.1188
CREB1	cold vs. hot	MEEI20_Primary MEEI6_Primary MEEI17_Primary	330 321 123	MEEI25_Primary MEEI18_Primary	140 113	0.245153	0.0156258	log2	0.229527	1.17245	path.score ~ 0 + (1 | tumor_name)	2	-440.908	-2	4.25744	0.118989	0.125364
TMEM173	cold vs. hot	MEEI20_Primary MEEI6_Primary MEEI17_Primary	330 321 123	MEEI25_Primary MEEI18_Primary	140 113	0.323803	0.234107	log2	0.0896961	1.06415	path.score ~ 0 + (1 | tumor_name)	2	-915.228	-2	4.25752	0.118984	0.125364
SH3TC2	cold vs. hot	MEEI20_Primary MEEI6_Primary MEEI17_Primary	330 321 123	MEEI25_Primary MEEI18_Primary	140 113	0.63881	-0.190624	log2	0.829434	1.77699	path.score ~ 0 + (1 | tumor_name)	2	-883.911	-2	4.05991	0.131342	0.13595
PCDH11Y	cold vs. hot	MEEI20_Primary MEEI6_Primary MEEI17_Primary	330 321 123	MEEI25_Primary MEEI18_Primary	140 113	0.183854	0.111127	log2	0.0727265	1.0517	path.score ~ 0 + (1 | tumor_name)	2	-722.684	-2	3.6028	0.165068	0.167914
PPRC1	cold vs. hot	MEEI20_Primary MEEI6_Primary MEEI17_Primary	330 321 123	MEEI25_Primary MEEI18_Primary	140 113	0.333366	0.402955	log2	-0.0695884	-1.04942	path.score ~ 0 + (1 | tumor_name)	2	-800.266	-2	3.02332	0.220543	0.220543

## Sheet: Table_S3
pathway	comp	group1.samples	group1.cells	group2.samples	group2.cells	mean1	mean2	log.method	log2fc	fc	lrt.term	lrt.X.Df	lrt.LogLik	lrt.df	lrt.statistic	lrt.p.value	lrt.p.adj
PAX7	cold vs. hot	HN07_Primary	689	HN09_Primary HN01_Primary HN10_Primary	2637 74 123	0.98661	0.295231	nature log	0.997448	1.99647	path.score ~ 0 + (1 | tumor_name)	2	-3921.39	-2	20.6386	3.3e-05	0.00194647
JAK1_2	cold vs. hot	HN07_Primary	689	HN09_Primary HN01_Primary HN10_Primary	2637 74 123	0.734783	0.0676814	nature log	0.962424	1.94858	path.score ~ 0 + (1 | tumor_name)	2	-2939.71	-2	17.4976	0.000158648	0.00468012
SCAP	cold vs. hot	HN07_Primary	689	HN09_Primary HN01_Primary HN10_Primary	2637 74 123	0.851542	0.0581178	nature log	1.14467	2.21095	path.score ~ 0 + (1 | tumor_name)	2	-2168.15	-2	15.7745	0.000375506	0.00639969
SOX2	cold vs. hot	HN07_Primary	689	HN09_Primary HN01_Primary HN10_Primary	2637 74 123	1.21897	0.196697	nature log	1.47482	2.77949	path.score ~ 0 + (1 | tumor_name)	2	-1393.64	-2	15.4855	0.000433877	0.00639969
TGFA	cold vs. hot	HN07_Primary	689	HN09_Primary HN01_Primary HN10_Primary	2637 74 123	0.804663	0.336473	nature log	0.675455	1.5971	path.score ~ 0 + (1 | tumor_name)	2	-2753.52	-2	14.9473	0.000567847	0.00670059
KLF4	cold vs. hot	HN07_Primary	689	HN09_Primary HN01_Primary HN10_Primary	2637 74 123	1.55074	0.535493	nature log	1.4647	2.76005	path.score ~ 0 + (1 | tumor_name)	2	-2626.63	-2	13.8285	0.000993516	0.0086506
TMEM173	cold vs. hot	HN07_Primary	689	HN09_Primary HN01_Primary HN10_Primary	2637 74 123	0.451935	0.0725039	nature log	0.547403	1.46145	path.score ~ 0 + (1 | tumor_name)	2	-3091.61	-2	13.7635	0.00102634	0.0086506
EHMT1	cold vs. hot	HN07_Primary	689	HN09_Primary HN01_Primary HN10_Primary	2637 74 123	0.206543	0.040607	nature log	0.239394	1.1805	path.score ~ 0 + (1 | tumor_name)	2	-1998.2	-2	12.2497	0.00218779	0.0113705
IL5	cold vs. hot	HN07_Primary	689	HN09_Primary HN01_Primary HN10_Primary	2637 74 123	1.02808	0.119844	nature log	1.31031	2.47995	path.score ~ 0 + (1 | tumor_name)	2	-2269.44	-2	12.5038	0.00192677	0.0113705
P38_MAPK	cold vs. hot	HN07_Primary	689	HN09_Primary HN01_Primary HN10_Primary	2637 74 123	0.509128	0.045634	nature log	0.66868	1.58962	path.score ~ 0 + (1 | tumor_name)	2	-1026.04	-2	12.2025	0.00224007	0.0113705
RELA	cold vs. hot	HN07_Primary	689	HN09_Primary HN01_Primary HN10_Primary	2637 74 123	1.25535	0.281168	nature log	1.40544	2.64899	path.score ~ 0 + (1 | tumor_name)	2	-2162.67	-2	12.1387	0.00231264	0.0113705
SREBF2	cold vs. hot	HN07_Primary	689	HN09_Primary HN01_Primary HN10_Primary	2637 74 123	0.909617	0.0476883	nature log	1.2435	2.36772	path.score ~ 0 + (1 | tumor_name)	2	-2802.57	-2	12.4524	0.001977	0.0113705
CD38	cold vs. hot	HN07_Primary	689	HN09_Primary HN01_Primary HN10_Primary	2637 74 123	1.05622	0.136286	nature log	1.32719	2.50913	path.score ~ 0 + (1 | tumor_name)	2	-2547.43	-2	11.9502	0.0025412	0.0115331
NFE2L2	cold vs. hot	HN07_Primary	689	HN09_Primary HN01_Primary HN10_Primary	2637 74 123	0.773221	0.266275	nature log	0.731368	1.66021	path.score ~ 0 + (1 | tumor_name)	2	-1073.37	-2	11.5893	0.00304385	0.0119725
SREBF1	cold vs. hot	HN07_Primary	689	HN09_Primary HN01_Primary HN10_Primary	2637 74 123	0.727002	0.0354154	nature log	0.997748	1.99688	path.score ~ 0 + (1 | tumor_name)	2	-1687.48	-2	11.6179	0.0030006	0.0119725
EGF	cold vs. hot	HN07_Primary	689	HN09_Primary HN01_Primary HN10_Primary	2637 74 123	1.63117	0.378162	nature log	1.80771	3.50085	path.score ~ 0 + (1 | tumor_name)	2	-3281.48	-2	10.6068	0.00497462	0.0183439
ESR1	cold vs. hot	HN07_Primary	689	HN09_Primary HN01_Primary HN10_Primary	2637 74 123	0.991209	0.148132	nature log	1.2163	2.32351	path.score ~ 0 + (1 | tumor_name)	2	-1631.11	-2	9.63936	0.00806939	0.0206997
F7	cold vs. hot	HN07_Primary	689	HN09_Primary HN01_Primary HN10_Primary	2637 74 123	1.24484	0.300709	nature log	1.3621	2.57058	path.score ~ 0 + (1 | tumor_name)	2	-4347.22	-2	9.77126	0.00755436	0.0206997
GLI1	cold vs. hot	HN07_Primary	689	HN09_Primary HN01_Primary HN10_Primary	2637 74 123	1.33679	0.344905	nature log	1.43098	2.69631	path.score ~ 0 + (1 | tumor_name)	2	-3619.94	-2	9.64483	0.00804732	0.0206997
Mek	cold vs. hot	HN07_Primary	689	HN09_Primary HN01_Primary HN10_Primary	2637 74 123	0.73126	0.151278	nature log	0.836738	1.78601	path.score ~ 0 + (1 | tumor_name)	2	-3053.65	-2	9.86401	0.00721202	0.0206997
PI3K__complex_	cold vs. hot	HN07_Primary	689	HN09_Primary HN01_Primary HN10_Primary	2637 74 123	1.21938	0.254141	nature log	1.39254	2.62541	path.score ~ 0 + (1 | tumor_name)	2	-3203.21	-2	10.0675	0.0065144	0.0206997
Pkc_s_	cold vs. hot	HN07_Primary	689	HN09_Primary HN01_Primary HN10_Primary	2637 74 123	1.09481	0.4533	nature log	0.925507	1.89935	path.score ~ 0 + (1 | tumor_name)	2	-3121.29	-2	9.75108	0.00763096	0.0206997
SP1	cold vs. hot	HN07_Primary	689	HN09_Primary HN01_Primary HN10_Primary	2637 74 123	0.530344	0.102359	nature log	0.617452	1.53416	path.score ~ 0 + (1 | tumor_name)	2	-1004.25	-2	9.88374	0.00714125	0.0206997
CTNNB1	cold vs. hot	HN07_Primary	689	HN09_Primary HN01_Primary HN10_Primary	2637 74 123	0.879746	0.175505	nature log	1.016	2.02231	path.score ~ 0 + (1 | tumor_name)	2	-1908.9	-2	9.34783	0.00933563	0.0213778
MAP2K1_2	cold vs. hot	HN07_Primary	689	HN09_Primary HN01_Primary HN10_Primary	2637 74 123	1.12068	0.255796	nature log	1.24777	2.37474	path.score ~ 0 + (1 | tumor_name)	2	-4139.03	-2	9.32968	0.00942074	0.0213778
TNF	cold vs. hot	HN07_Primary	689	HN09_Primary HN01_Primary HN10_Primary	2637 74 123	1.39366	0.406907	nature log	1.42358	2.68251	path.score ~ 0 + (1 | tumor_name)	2	-1828.88	-2	9.41072	0.00904664	0.0213778
JUN	cold vs. hot	HN07_Primary	689	HN09_Primary HN01_Primary HN10_Primary	2637 74 123	0.941091	0.242888	nature log	1.00729	2.01014	path.score ~ 0 + (1 | tumor_name)	2	-2047.98	-2	9.0849	0.0106473	0.022148
PLG	cold vs. hot	HN07_Primary	689	HN09_Primary HN01_Primary HN10_Primary	2637 74 123	0.462079	0.0334629	nature log	0.618363	1.53513	path.score ~ 0 + (1 | tumor_name)	2	-1893.09	-2	8.97703	0.0112373	0.022148
PPRC1	cold vs. hot	HN07_Primary	689	HN09_Primary HN01_Primary HN10_Primary	2637 74 123	1.15969	0.270983	nature log	1.28213	2.43198	path.score ~ 0 + (1 | tumor_name)	2	-3925.67	-2	9.16911	0.0102083	0.022148
SMARCA4	cold vs. hot	HN07_Primary	689	HN09_Primary HN01_Primary HN10_Primary	2637 74 123	0.740346	0.311659	nature log	0.618464	1.53524	path.score ~ 0 + (1 | tumor_name)	2	-1176.98	-2	8.97269	0.0112617	0.022148
EPAS1	cold vs. hot	HN07_Primary	689	HN09_Primary HN01_Primary HN10_Primary	2637 74 123	1.16051	0.359257	nature log	1.15596	2.22833	path.score ~ 0 + (1 | tumor_name)	2	-2740.76	-2	8.79947	0.0122806	0.0230408
ERBB2	cold vs. hot	HN07_Primary	689	HN09_Primary HN01_Primary HN10_Primary	2637 74 123	1.06046	0.368089	nature log	0.998878	1.99845	path.score ~ 0 + (1 | tumor_name)	2	-1357.45	-2	8.76458	0.0124967	0.0230408
ERK	cold vs. hot	HN07_Primary	689	HN09_Primary HN01_Primary HN10_Primary	2637 74 123	1.08844	0.278423	nature log	1.16861	2.24794	path.score ~ 0 + (1 | tumor_name)	2	-3094.78	-2	8.50566	0.0142239	0.0254306
CREB1	cold vs. hot	HN07_Primary	689	HN09_Primary HN01_Primary HN10_Primary	2637 74 123	0.700764	0.0952057	nature log	0.873636	1.83228	path.score ~ 0 + (1 | tumor_name)	2	-2129.41	-2	8.09824	0.0174377	0.0278061
CREM	cold vs. hot	HN07_Primary	689	HN09_Primary HN01_Primary HN10_Primary	2637 74 123	1.01894	0.170643	nature log	1.22384	2.33567	path.score ~ 0 + (1 | tumor_name)	2	-3349.58	-2	8.25494	0.0161236	0.0278061
Lh	cold vs. hot	HN07_Primary	689	HN09_Primary HN01_Primary HN10_Primary	2637 74 123	0.784059	0.104414	nature log	0.98052	1.97318	path.score ~ 0 + (1 | tumor_name)	2	-2486.47	-2	8.14179	0.0170621	0.0278061
SH3TC2	cold vs. hot	HN07_Primary	689	HN09_Primary HN01_Primary HN10_Primary	2637 74 123	0.910272	0.110104	nature log	1.1544	2.22592	path.score ~ 0 + (1 | tumor_name)	2	-3948.25	-2	8.11504	0.0172919	0.0278061
MYC	cold vs. hot	HN07_Primary	689	HN09_Primary HN01_Primary HN10_Primary	2637 74 123	1.06896	0.289203	nature log	1.12494	2.18093	path.score ~ 0 + (1 | tumor_name)	2	-1765.15	-2	7.97527	0.0185435	0.0287912
HIF1A	cold vs. hot	HN07_Primary	689	HN09_Primary HN01_Primary HN10_Primary	2637 74 123	0.73559	0.16207	nature log	0.827414	1.7745	path.score ~ 0 + (1 | tumor_name)	2	-2146.83	-2	7.89263	0.0193258	0.0292364
PCDH11Y	cold vs. hot	HN07_Primary	689	HN09_Primary HN01_Primary HN10_Primary	2637 74 123	0.566596	0.100676	nature log	0.672181	1.59348	path.score ~ 0 + (1 | tumor_name)	2	-3701.1	-2	7.72538	0.0210114	0.0309918
ELK1	cold vs. hot	HN07_Primary	689	HN09_Primary HN01_Primary HN10_Primary	2637 74 123	1.15508	0.613328	nature log	0.781582	1.71901	path.score ~ 0 + (1 | tumor_name)	2	-4460.1	-2	7.1201	0.0284375	0.0409222
ARNT	cold vs. hot	HN07_Primary	689	HN09_Primary HN01_Primary HN10_Primary	2637 74 123	0.954712	0.256918	nature log	1.0067	2.00932	path.score ~ 0 + (1 | tumor_name)	2	-3175.74	-2	6.90887	0.0316052	0.0443978
AHR	cold vs. hot	HN07_Primary	689	HN09_Primary HN01_Primary HN10_Primary	2637 74 123	0.92786	0.251084	nature log	0.976382	1.96752	path.score ~ 0 + (1 | tumor_name)	2	-1970.06	-2	6.3246	0.0423283	0.0531355
CG	cold vs. hot	HN07_Primary	689	HN09_Primary HN01_Primary HN10_Primary	2637 74 123	0.930855	0.202317	nature log	1.05106	2.07205	path.score ~ 0 + (1 | tumor_name)	2	-1550.54	-2	6.34399	0.04192	0.0531355
FGF2	cold vs. hot	HN07_Primary	689	HN09_Primary HN01_Primary HN10_Primary	2637 74 123	1.21199	0.374169	nature log	1.20872	2.31132	path.score ~ 0 + (1 | tumor_name)	2	-3661.68	-2	6.37081	0.0413615	0.0531355
FSH	cold vs. hot	HN07_Primary	689	HN09_Primary HN01_Primary HN10_Primary	2637 74 123	0.828332	0.144402	nature log	0.986703	1.98165	path.score ~ 0 + (1 | tumor_name)	2	-1946.1	-2	6.35778	0.0416319	0.0531355
PRKCD	cold vs. hot	HN07_Primary	689	HN09_Primary HN01_Primary HN10_Primary	2637 74 123	1.00718	0.331741	nature log	0.974455	1.9649	path.score ~ 0 + (1 | tumor_name)	2	-3165.67	-2	6.43771	0.0400008	0.0531355
RPTOR	cold vs. hot	HN07_Primary	689	HN09_Primary HN01_Primary HN10_Primary	2637 74 123	1.11172	0.221108	nature log	1.28488	2.43663	path.score ~ 0 + (1 | tumor_name)	2	-3756.41	-2	6.26511	0.0436062	0.0535993
PI3K__family_	cold vs. hot	HN07_Primary	689	HN09_Primary HN01_Primary HN10_Primary	2637 74 123	0.813234	0.289281	nature log	0.755904	1.68869	path.score ~ 0 + (1 | tumor_name)	2	-3626.31	-2	6.11394	0.0470299	0.0566279
FOXA2	cold vs. hot	HN07_Primary	689	HN09_Primary HN01_Primary HN10_Primary	2637 74 123	0.842507	0.148356	nature log	1.00145	2.00201	path.score ~ 0 + (1 | tumor_name)	2	-3664.81	-2	6.01059	0.0495241	0.0584384
PGR	cold vs. hot	HN07_Primary	689	HN09_Primary HN01_Primary HN10_Primary	2637 74 123	0.859963	0.359028	nature log	0.722698	1.65026	path.score ~ 0 + (1 | tumor_name)	2	-2634.66	-2	5.66315	0.0589199	0.0681623
MAP2K1	cold vs. hot	HN07_Primary	689	HN09_Primary HN01_Primary HN10_Primary	2637 74 123	0.418737	0.127406	nature log	0.420301	1.33821	path.score ~ 0 + (1 | tumor_name)	2	-3056.77	-2	5.58058	0.0614034	0.0696692
EGR1	cold vs. hot	HN07_Primary	689	HN09_Primary HN01_Primary HN10_Primary	2637 74 123	0.678656	0.218882	nature log	0.663313	1.58372	path.score ~ 0 + (1 | tumor_name)	2	-3538.7	-2	5.20983	0.0739093	0.0822764
IKBKE	cold vs. hot	HN07_Primary	689	HN09_Primary HN01_Primary HN10_Primary	2637 74 123	0.795276	0.16215	nature log	0.913407	1.88349	path.score ~ 0 + (1 | tumor_name)	2	-3129.22	-2	5.04988	0.0800631	0.0874764
SMAD3	cold vs. hot	HN07_Primary	689	HN09_Primary HN01_Primary HN10_Primary	2637 74 123	0.818532	0.194745	nature log	0.899934	1.86598	path.score ~ 0 + (1 | tumor_name)	2	-3229.3	-2	4.78827	0.0912517	0.0978882
Creb	cold vs. hot	HN07_Primary	689	HN09_Primary HN01_Primary HN10_Primary	2637 74 123	0.436223	0.0637839	nature log	0.537316	1.45127	path.score ~ 0 + (1 | tumor_name)	2	-1453.36	-2	4.25441	0.11917	0.125554
PTH	cold vs. hot	HN07_Primary	689	HN09_Primary HN01_Primary HN10_Primary	2637 74 123	0.774497	0.437445	nature log	0.486264	1.40081	path.score ~ 0 + (1 | tumor_name)	2	-4538.3	-2	4.07614	0.13028	0.134851
SYVN1	cold vs. hot	HN07_Primary	689	HN09_Primary HN01_Primary HN10_Primary	2637 74 123	0.766382	0.183038	nature log	0.841588	1.79202	path.score ~ 0 + (1 | tumor_name)	2	-2861.05	-2	3.24671	0.197236	0.200637
PDGF_BB	cold vs. hot	HN07_Primary	689	HN09_Primary HN01_Primary HN10_Primary	2637 74 123	0.391989	0.0771818	nature log	0.454171	1.37	path.score ~ 0 + (1 | tumor_name)	2	-2135.71	-2	2.21098	0.331048	0.331048

## Sheet: Table_S4
pathway	cohortA.combined.rank.geomean	cohortA.combined.rank.mean	cohortA.combined.rank.multiply	cohortA.combined.rank.maxdiff	cohortA.coldvshot.sig	cohortA.ensembl.sig	cohortB.combined.rank.geomean	cohortB.combined.rank.mean	cohortB.combined.rank.multiply	cohortB.combined.rank.maxdiff	cohortB.coldvshot.sig	cohortB.ensembl.sig	cohortB.ensembl.sig.cohortA.ensembl.sig
AHR	0.148458	0.333333	0.003272	0.694915	1	0	0.53576	0.59322	0.153784	0.525424	1	0	0
ARNT	0.339688	0.350282	0.0391958	0.186441	1	0	0.489915	0.508475	0.117587	0.322034	1	0	0
CD38	0.381895	0.457627	0.055697	0.542373	1	0	0.28585	0.355932	0.0233568	0.542373	1	1	0
CG	0.305919	0.333333	0.02863	0.305085	1	0	0.397301	0.474576	0.0627133	0.610169	1	0	0
Creb	0.409081	0.480226	0.0684588	0.474576	1	0	0.72645	0.740113	0.383369	0.322034	0	0	0
CREB1	0.269767	0.412429	0.019632	0.745763	0	0	0.247348	0.350282	0.015133	0.559322	1	1	0
CREM	0.688508	0.694915	0.326382	0.220339	1	0	0.663448	0.672316	0.292026	0.254237	1	0	0
CTNNB1	0.240474	0.333333	0.013906	0.508475	1	1	0.217047	0.282486	0.010225	0.355932	1	1	1
EGF	0.401322	0.502825	0.0646366	0.745763	0	0	0.410049	0.508475	0.0689457	0.745763	1	0	0
EGR1	0.375846	0.615819	0.0530921	0.915254	0	0	0.889369	0.892655	0.70347	0.186441	1	0	0
EHMT1	0.654876	0.672316	0.280851	0.372881	0	0	0.380454	0.440678	0.0550689	0.491525	1	0	0
ELK1	0.525147	0.564972	0.144825	0.508475	1	0	0.646251	0.672316	0.269901	0.440678	1	0	0
EPAS1	0.142955	0.175141	0.00292143	0.254237	1	1	0.262621	0.322034	0.0181129	0.423729	1	1	1
ERBB2	0.519532	0.525424	0.140229	0.186441	0	0	0.564091	0.564972	0.179493	0.0677966	1	0	0
ERK	0.363937	0.502825	0.0482036	0.745763	0	0	0.642412	0.655367	0.26512	0.288136	1	0	0
ESR1	0.21044	0.305085	0.00931936	0.440678	1	1	0.194792	0.271186	0.00739121	0.338983	1	1	1
F7	0.551637	0.655367	0.167865	0.661017	0	0	0.401171	0.474576	0.0645636	0.644068	1	0	0
FGF2	0.265415	0.508475	0.0186971	0.779661	1	0	0.743703	0.745763	0.411337	0.135593	1	0	0
FOXA2	0.598899	0.666667	0.214813	0.661017	0	0	0.629777	0.706215	0.249782	0.661017	1	0	0
FSH	0.33836	0.389831	0.0387381	0.423729	0	0	0.578588	0.59322	0.193691	0.322034	1	0	0
GLI1	0.444078	0.485876	0.0875747	0.491525	0	0	0.347281	0.350282	0.0418835	0.101695	1	0	0
HIF1A	0.192717	0.248588	0.0071575	0.389831	1	1	0.341646	0.429379	0.0398775	0.542373	1	0	0
IKBKE	0.811169	0.819209	0.533745	0.271186	0	0	0.861996	0.870056	0.640494	0.271186	1	0	0
IL5	0.30041	0.378531	0.0271109	0.440678	1	0	0.189246	0.242938	0.00677771	0.389831	1	1	0
JAK1_2	0.707066	0.717514	0.353493	0.288136	1	0	0.277736	0.542373	0.0214238	0.813559	1	0	0
JUN	0.176017	0.19774	0.00545333	0.186441	0	0	0.212113	0.265537	0.00954333	0.389831	1	1	0
KLF4	0.25386	0.288136	0.01636	0.338983	0	0	0.151912	0.163842	0.00350571	0.152542	1	1	0
Lh	0.548224	0.570621	0.164769	0.389831	0	0	0.57713	0.59887	0.19223	0.389831	1	0	0
MAP2K1	0.813996	0.824859	0.539344	0.288136	0	0	0.808844	0.819209	0.529168	0.288136	1	0	0
MAP2K1_2	0.863761	0.870056	0.644438	0.237288	0	0	0.676997	0.711864	0.310285	0.525424	1	0	0
Mek	0.257289	0.440678	0.0170319	0.847458	0	0	0.476027	0.531073	0.107869	0.576271	1	0	0
MYC	0.154607	0.20904	0.00369561	0.338983	1	1	0.182774	0.293785	0.00610578	0.59322	1	1	1
NFE2L2	0.141023	0.259887	0.00280457	0.576271	1	1	0.10533	0.141243	0.00116857	0.220339	1	1	1
P38_MAPK	0.273723	0.293785	0.0205084	0.254237	1	1	0.258897	0.282486	0.0173533	0.271186	1	1	1
PAX7	0.662337	0.683616	0.29056	0.40678	0	0	0.174164	0.378531	0.00528292	0.576271	1	1	0
PCDH11Y	0.648451	0.666667	0.272667	0.372881	0	0	0.601969	0.610169	0.218133	0.20339	1	0	0
PDGF_BB	0.230647	0.276836	0.01227	0.389831	1	1	0.392198	0.542373	0.0603275	0.881356	0	0	0
PGR	0.469683	0.536723	0.103613	0.627119	1	0	0.652746	0.717514	0.27812	0.610169	1	0	0
PI3K__complex_	0.598654	0.632768	0.21455	0.508475	1	0	0.533648	0.59322	0.151973	0.627119	1	0	0
PI3K__family_	0.554946	0.587571	0.170904	0.457627	1	0	0.676905	0.711864	0.310158	0.457627	1	0	0
Pkc_s_	0.339772	0.451977	0.039225	0.762712	1	0	0.468703	0.525424	0.102966	0.576271	1	0	0
PLG	0.494178	0.553672	0.120684	0.627119	1	0	0.590473	0.621469	0.205873	0.457627	1	0	0
PPRC1	0.726794	0.745763	0.383915	0.40678	0	0	0.569906	0.581921	0.185102	0.288136	1	0	0
PRKCD	0.359923	0.468927	0.046626	0.762712	0	0	0.327648	0.389831	0.035174	0.525424	1	0	0
PTH	0.846122	0.858757	0.605758	0.322034	0	0	0.841231	0.853107	0.595314	0.305085	0	0	0
RELA	0.779169	0.779661	0.473038	0.0677966	0	0	0.505291	0.59887	0.12901	0.610169	1	0	0
RPTOR	0.676693	0.677966	0.309866	0.101695	1	0	0.719093	0.723164	0.371839	0.186441	1	0	0
SCAP	0.137422	0.310734	0.0025952	0.677966	1	0	0.0574782	0.0960452	0.000189893	0.20339	1	1	0
SH3TC2	0.807265	0.80791	0.526076	0.0677966	0	0	0.728425	0.734463	0.386505	0.220339	1	0	0
SMAD3	0.332651	0.384181	0.03681	0.440678	1	0	0.386741	0.497175	0.0578443	0.779661	1	0	0
SMARCA4	0.118297	0.214689	0.00165548	0.322034	0	0	0.135416	0.271186	0.00248321	0.491525	1	1	0
SOX2	0.657949	0.672316	0.284825	0.338983	1	0	0.313433	0.485876	0.0307919	0.79661	1	0	0
SP1	0.501021	0.531073	0.125767	0.389831	1	0	0.501021	0.531073	0.125767	0.389831	1	0	0
SREBF1	0.360972	0.525424	0.047035	0.694915	0	0	0.250284	0.367232	0.0156783	0.694915	1	0	0
SREBF2	0.489061	0.59887	0.116974	0.762712	1	0	0.299978	0.429379	0.026994	0.79661	1	0	0
SYVN1	0.217871	0.446328	0.0103419	0.966102	0	0	0.216633	0.440678	0.0101666	0.949153	0	0	0
TGFA	0.476571	0.508475	0.108239	0.440678	0	0	0.275081	0.389831	0.0208152	0.677966	1	0	0
TMEM173	0.763782	0.785311	0.445562	0.440678	0	0	0.404858	0.559322	0.0663602	0.881356	1	0	0
TNF	0.204638	0.20904	0.00856952	0.101695	0	0	0.265415	0.282486	0.0186971	0.237288	1	1	0

## Sheet: Table_S5
Core	SampleType	CD8.frac	CTNNB1.frac	phosP38.frac
1	Primary Tumors	0.125105	0.811661	0.366237
2	Primary Tumors	0.129157	0.540127	0.00352113
3	Primary Tumors	0.0119017	0.823043	0.186781
4	Primary Tumors	0.0178077	0.408025	0.214916
5	Primary Tumors	0.110906	0.121749	0.00170068
6	Primary Tumors	0.0597496	0.274797	0.478201
7	Primary Tumors	0.0330652	0.94733	0.00140252
8	Primary Tumors	0.00176212	0.0499109	0.0253979
9	Primary Tumors	0.0172779	0.846639	0.850734
10	Primary Tumors	0.0372414	0.601806	0.00644512
11	Primary Tumors	0.0734276	0.696371	0.000371885
12	Primary Tumors	0.0231214	0.506571	0.312447
13	Primary Tumors	0.0274069	0.776139	0.443176
14	Primary Tumors	0.0566893	0.27405	0.00158103
15	Primary Tumors	0.0394485	0.78915	0.118032
16	Primary Tumors	0	0.916431	0.0254545
17	Primary Tumors	0.00920559	0.356008	0.242812
18	Primary Tumors	0.0180412	0.647702	0.623482
19	Primary Tumors	0.00794913	0.543978	0.00337423
20	Primary Tumors	0.207145	0.262136	0.0871341
21	Primary Tumors	0.188396	0.171944	0.047502
22	Primary Tumors	0.0623628	0.535773	0
23	Primary Tumors	0.0635762	0.288665	0.0769596
24	Primary Tumors	0.0361124	0.56289	0.000797766
25	Primary Tumors	0.000725426	0.869694	0.0319452
26	Primary Tumors	0.00561482	0.584406	0.0521701
27	Primary Tumors	0.0524809	0.68367	0.663674
28	Primary Tumors	0.00057554	0.745043	0.129984
29	Primary Tumors	0.224658	0.0304017	0.0026087
30	Primary Tumors	0.00760456	0.898589	0.136876
31	Primary Tumors	0.158074	0.735386	0.180265
32	Primary Tumors	0.165043	0.253744	0.0832298
33	Primary Tumors	0.00242718	0.219551	0.00373134
34	Primary Tumors	0.0459016	0.917361	0.000431406
35	Primary Tumors	0.0252499	0.217098	0.273555
36	Primary Tumors	0.00204006	0.354303	0.0172652
37	Primary Tumors	0.0806223	0.771402	0.320717
38	Primary Tumors	0.0117316	0.361698	0.00417766
39	Primary Tumors	0.0746988	0.570344	0.00543057
40	Primary Tumors	0.166387	0.352317	0.0811623
41	Primary Tumors	0.162172	0.0485323	0.0775623
42	Primary Tumors	0.0326912	0.658157	0.000422476
43	Primary Tumors	0.107692	0.590244	0.769231
44	Primary Tumors	0.136251	0.458402	0.179781
45	Primary Tumors	0.021225	0.403356	0
46	Primary Tumors	0.305767	0.0385216	0.0970337
47	Primary Tumors	0.00215363	0.716716	0.03386
48	Primary Tumors	0.0321757	0.596858	0.116291
49	Primary Tumors	0	0.75582	0.0267913
50	Primary Tumors	0.0556186	0.158816	0.0422686
51	Primary Tumors	0.0330871	0.198718	0.240619
52	Primary Tumors	0.0912584	0.627278	0.000982318
53	Primary Tumors	0.00090036	0.834599	0.341993
54	Primary Tumors	0.0993724	0.711916	0.248101
55	Primary Tumors	0.10794	0.148911	0.252073
56	Primary Tumors	0.271819	0.442458	0.00092081
57	Primary Tumors	0.0313015	0.464074	0.0134387
58	Primary Tumors	0.240122	0.329719	0.0129151
59	Primary Tumors	0.0344168	0.681185	0.181975
60	Primary Tumors	0.0307564	0.789431	0.774059
61	Primary Tumors	0.00851323	0.643246	0.00553914
62	Primary Tumors	0.0837209	0.069435	0.0140572
63	Primary Tumors	0.0622271	0.5	0.0124224
64	Primary Tumors	0.0202917	0.926816	0
65	Primary Tumors	0	0.930849	0.449758
66	Primary Tumors	0.0142216	0.602157	0.758214
67	Primary Tumors	0.0804983	0.234297	0.0181818
68	Primary Tumors	0.0221239	0.108491	0.0108696
69	Primary Tumors	0.107843	0.383607	0.0307329

## Sheet: Table_S6
Core	SampleType	CD3CD8.pct	CD3CD8PD1.pct	PanCKphosP38.pct	phosP38.pct
101	Primary Tumors	3.31203	2.99245	0.929692	2.23707
102	Primary Tumors	0.87108	0.348432	9.05923	9.23345
103	Normal Mucosa	0.854701	0.854701	88.8889	95.641
104	Normal Mucosa	2.32558	2.32558	23.2558	55.814
105	Primary Tumors	0.529902	0.264951	24.3187	59.4058
106	Primary Tumors	0.951626	0.793021	78.9585	89.585
107	Primary Tumors	2.30643	1.97694	1.21911	1.64745
108	Primary Tumors	0	0	28.2069	43.7878
109	Primary Tumors	10.8723	5.43616	41.4665	67.5095
110	Normal Mucosa	0.508762	0.452233	80.9497	88.5246
111	Normal Mucosa	0.515464	0.206186	29.3814	50.6186
112	Primary Tumors	2.95061	2.56575	9.04426	24.118
113	Primary Tumors	0.639659	0.373134	16.2047	89.9254
114	Primary Tumors	0.0584966	0.0292483	0.204738	0.35098
115	Primary Tumors	1.51344	1.28755	6.39259	8.29004
116	Primary Tumors	0.130208	0.130208	61.6536	73.2639
117	Primary Tumors	1.56895	1.19736	40.4211	67.2585
118	Primary Tumors	3.80701	3.05315	4.90011	32.1146
119	Normal Mucosa	5.48204	2.6465	25.8034	42.344
120	Normal Mucosa	4.6332	2.7027	32.8185	59.0734
121	Normal Mucosa	0.562948	0.460594	10.9519	84.6469
122	Primary Tumors	0.0379651	0.0379651	52.5816	85.915
123	Primary Tumors	2.58021	1.72762	29.908	48.6426
124	Primary Tumors	2.95869	1.54447	1.09788	1.377
125	Primary Tumors	2.27449	1.29232	11.0881	78.9093
126	Primary Tumors	0.726895	0.259605	10.0208	16.4071
127	Primary Tumors	0.621118	0.349379	48.5637	82.8804
128	Primary Tumors	1.7734	1.7734	55.9606	71.2315
129	Normal Mucosa	4.70367	4.09219	32.7846	62.5588
130	Primary Tumors	0.622794	0.249118	31.4511	44.7166
131	Primary Tumors	2.01918	1.43867	11.6608	12.418
132	Primary Tumors	5.05952	2.67857	2.67857	11.9048
133	Normal Mucosa	0.612662	0.476515	32.6753	76.9231
134	Primary Tumors	2.94405	1.79992	2.20455	10.9111
135	Normal Mucosa	2.80172	2.04741	20.7435	46.8211
136	Primary Tumors	0.148568	0.0540249	71.0022	83.4414
137	Primary Tumors	1.39899	0.57825	11.8448	14.5122
138	Normal Mucosa	0.113379	0	10.4308	22.1088
139	Normal Mucosa	1.68878	1.20627	6.6345	9.2883
140	Primary Tumors	0.907544	0.680658	45.2638	56.5513
141	Normal Mucosa	4.88669	1.48725	2.76204	53.7535
142	Primary Tumors	0	0	22.3369	92.5856
143	Primary Tumors	3.64312	1.33829	1.37546	1.78439
144	Primary Tumors	1.21127	0.3727	49.4759	85.6744
145	Primary Tumors	1.65144	1.15952	32.3612	57.3788
146	Primary Tumors	0.0726568	0.0484379	53.7418	74.449
147	Primary Tumors	8.20173	4.73765	22.0581	36.1182
148	Primary Tumors	0.443787	0.443787	34.9112	44.8225
149	Primary Tumors	0.540275	0.343811	21.3654	54.1749
150	Normal Mucosa	0.125922	0.0899442	7.82515	82.0471
151	Primary Tumors	0.482788	0.27288	26.5113	35.6843
152	Normal Mucosa	1.71544	1.00908	73.663	99.0918
153	Primary Tumors	2.83874	2.07369	10.0262	13.8313
154	Normal Mucosa	3.93487	2.57802	21.8453	63.5007
155	Primary Tumors	4.02245	3.74181	27.6894	81.7587
156	Normal Mucosa	5.70949	1.34341	18.8917	65.827
157	Primary Tumors	0.312213	0.275482	55.6474	60.4775
158	Normal Mucosa	1.68467	1.42549	55.3348	89.8056
159	Primary Tumors	10.1297	8.28343	10.6786	14.6707
160	Primary Tumors	2.44249	1.67566	5.82221	20.2499
161	Normal Mucosa	0.833333	0.47619	25.5952	50
162	Primary Tumors	3.96396	2.88288	18.5586	50.8108
163	Primary Tumors	0.142552	0.142552	23.6279	55.7377
164	Primary Tumors	11.5	6.65385	27.8846	62.4615
165	Primary Tumors	6.88917	4.45015	47.668	65.5113
166	Normal Mucosa	0	0	13.9535	55.814
167	Normal Mucosa	5.45037	4.64716	60.1836	87.3781
168	Primary Tumors	1.64251	0.821256	22.657	51.4734
169	Normal Mucosa	0.427168	0.299018	77.3174	93.2935
170	Normal Mucosa	0.784314	0.392157	76.8627	89.0196
171	Primary Tumors	0.995406	0.306279	37.2129	78.9051
172	Normal Mucosa	2.52828	1.1976	46.3074	59.1484
173	Primary Tumors	3.60825	2.16495	3.71134	9.89691
174	Primary Tumors	0.701978	0.574346	7.40268	23.6758
175	Primary Tumors	1.77857	1.20053	22.7212	79.8577
176	Primary Tumors	3.10192	2.21566	0.295421	2.06795
177	Primary Tumors	0.58072	0.193573	18.3895	81.4557
178	Primary Tumors	0.973236	0.875912	39.3674	60.5353
179	Normal Mucosa	12.0281	7.59438	32.9675	82.3749
180	Primary Tumors	2.11126	0.770777	40.4491	69.0684
181	Primary Tumors	2.54717	0.509434	36.1698	66.8302
182	Primary Tumors	0.127975	0.0255951	51.5485	69.3371
183	Normal Mucosa	0	0	24.2098	59.7848
184	Primary Tumors	0.175044	0	25.3063	32.2081
185	Normal Mucosa	1.28	0.84	70	82.8
186	Normal Mucosa	6.39941	3.53071	39.0217	76.7562
187	Primary Tumors	0.669486	0.563777	9.72516	66.4905
188	Primary Tumors	17.7044	4.27607	7.12678	10.0525
189	Primary Tumors	2.52685	1.64245	35.1232	57.2963
190	Normal Mucosa	1.72279	1.01801	45.4973	85.2584
191	Primary Tumors	3.1816	1.73764	27.9246	82.5012
192	Normal Mucosa	1.10436	0.662617	58.3103	98.3435
193	Normal Mucosa	2.03952	1.4659	60.6119	65.7106
194	Primary Tumors	1.96821	0.832702	73.732	89.0235
195	Primary Tumors	4.3369	0.817096	13.7021	21.7264
196	Primary Tumors	1.17605	0.356379	5.63079	20.8125
197	Normal Mucosa	0.893997	0.383142	85.3129	94.636
198	Normal Mucosa	0	0	9.09091	90.9091
199	Normal Mucosa	9.10673	6.61253	46.2297	64.6752
200	Primary Tumors	0.0746176	0.0621813	33.2048	76.8312
201	Normal Mucosa	3.42205	2.18631	36.7871	43.8213
202	Primary Tumors	2.57294	0.643235	19.1592	35.2401
203	Primary Tumors	0.0961538	0.0641026	49.4551	81.0256
204	Normal Mucosa	0.219238	0.137024	35.2151	92.957
205	Primary Tumors	1.07088	0.484447	1.19837	1.55533
206	Primary Tumors	0.0693722	0	38.7444	47.9709
207	Primary Tumors	8.50363	6.26236	7.38299	45.3527
208	Normal Mucosa	2.7972	1.32499	33.64	74.6043
209	Normal Mucosa	4.09091	1.73295	46.1364	92.7841
210	Normal Mucosa	0.358038	0.0358038	18.5464	25.1701
211	Primary Tumors	12.0437	4.55764	18.2718	38.8946
212	Primary Tumors	0.749532	0.65584	54.466	85.0094
213	Primary Tumors	2.93142	2.68252	31.5265	60.094
214	Primary Tumors	3.65957	0.0851064	3.82979	82.6383
215	Normal Mucosa	4.5865	2.35266	17.7519	95.6987
216	Primary Tumors	5.14316	1.98834	0.68929	1.13998
217	Primary Tumors	5.76271	4.11622	20.3632	76.6102
218	Primary Tumors	0.803898	0.243605	50.134	52.8624
219	Primary Tumors	3.91888	2.65826	10.085	12.9076
220	Normal Mucosa	12.4883	4.97653	49.5149	77.3083
221	Primary Tumors	3.60273	2.78481	43.3301	81.0906
222	Primary Tumors	1.04449	0.889749	29.4004	84.6035
223	Normal Mucosa	1.31148	1.27049	55.9426	88.0738
224	Primary Tumors	33.4643	14.767	8.16021	28.8228
225	Primary Tumors	0.0657895	0	30.5921	34.5724
226	Primary Tumors	0.270758	0.0300842	31.8592	34.0854
227	Primary Tumors	1.81818	1.30682	7.55682	44.4034
228	Normal Mucosa	0.962464	0.384986	64.7738	94.0327
229	Primary Tumors	0	0	33.2316	73.1782
230	Normal Mucosa	1.87553	1.53453	63.4271	84.5695
231	Primary Tumors	1.85811	0.651544	2.07529	2.7027
232	Primary Tumors	4.6832	2.75482	11.5702	22.8099
233	Primary Tumors	0.575027	0.219058	34.7207	38.6911
234	Primary Tumors	0.748363	0.155909	60.6174	83.6919
235	Normal Mucosa	0.403226	0.224014	55.1971	93.7276
236	Primary Tumors	16.8248	8.0673	21.6566	56.8594
237	Primary Tumors	4.96566	3.38088	0.686741	3.4337
238	Primary Tumors	1.45833	1.21528	52.0833	91.8056
239	Primary Tumors	1.48285	0.494285	1.42107	1.73
240	Primary Tumors	21.9214	13.0935	17.8412	29.0801
241	Normal Mucosa	8.94309	1.52439	38.9228	51.8293
242	Primary Tumors	8.81503	7.58671	1.37283	4.47977
243	Primary Tumors	0.813262	0.625586	34.1257	53.2061
244	Primary Tumors	6.79095	2.24146	13.8038	19.9068
245	Primary Tumors	0.973236	0.182482	32.3601	79.7445
246	Primary Tumors	0.0665336	0.0221779	23.1537	39.4988
247	Primary Tumors	0.263362	0.108443	8.65995	74.7637
248	Normal Mucosa	0.0923788	0	23.164	53.6259
249	Primary Tumors	0.272008	0.111276	37.9822	88.1058
250	Primary Tumors	2.75128	1.02715	17.3147	25.5319
251	Normal Mucosa	1.44766	1.22494	43.0958	67.0379
252	Primary Tumors	1.27903	0.471222	18.1084	21.6425
253	Normal Mucosa	0.529879	0.323815	33.824	57.7568
254	Primary Tumors	1.11857	0.268456	25.8613	54.1834

## Sheet: Table_S7
ID	Cohort	Age (Years)	Race	Ethnicity	Sex	ECOG	Cancer	LDH	Albumin (g/dL)	NLR	TMB (Muts/Mb)	MS Status	PDL1 Status§	Mutational Status	# Prior Lines	Best Response	RECIST confirmed response	irRECIST confirmed response	Clincial benefit (defined as not having progression and/or not receiving subsequent treatment beyond six months)	Not transitioned to a new therapy within one year of starting on protocol	Prior anti-PD1/PDL1 treatment	Duration of Treatment (days)	Duration of Benefit (days)	Baseline Tumor Burden (cm)	Final Tumor Burden (cm)
P002	PD-1	50	White	Non-Hispanic	Male	0	GEJ adenocarcinoma	WNL	4	4.28571	3	Stable	positive	n/a	1	PD					N	70	71	7.38	1.26‡
P003	PD-1	44	White	Non-Hispanic	Male	0	RCC	>ULN	4.4	2	n/a	n/a	n/a	n/a	4	PR	Y	Y	Y	Y	Y	726	985†	5.73	n/a†
P004	PD-1	55	White	Non-Hispanic	Female	1	NSCLC	>ULN	2.8	9.56471	n/a	n/a	negative	p53 mutation	5	SD					Y	8	84	13.18	13.3
P005	PD-1	74	White	Non-Hispanic	Male	1	Mesothelioma	>ULN	4.2	4.53846	n/a	n/a	negative	n/a	1	n/a					Y	15	15	13.64	n/a
P006	PD-1	81	White	Non-Hispanic	Male	0	RCC, clear cell	WNL	3.9	2.33333	n/a	n/a	negative	n/a	4	PD					Y	83	80	12.29	11.51‡
P007	PD-1	64	White	Non-Hispanic	Male	0	RCC, clear cell		3.8	5.875		n/a	negative	n/a	4	PD					Y	82	80	10.73	14.86
P011	PD-1	58	White	Non-Hispanic	Male	1	RCC, clear cell	>ULN	4	5.85714	1	Stable	n/a	CDH1, PBRM1, VHL splice site	2	SD					Y	33	154	15.14	17.64
P015	PD-1	69	White	Non-Hispanic	Male	1	NSCLC	WNL	4.5	4.8	5.4	Stable	negative	PTEN-D107Y; NOTCH1-G289_splice; Notch2-Gain; POLE-G6R	1	PR	Y	Y	Y	Y	Y	705	821†	6.53	n/a†
P016	PD-1	58	White	Non-Hispanic	Female	0	Melanoma, choroidal	>ULN	4.3	7.6	n/a	n/a	n/a	n/a	4	SD			Y	Y	Y	109	702	9.08	7.74‡
P017	PD-1	71	White	Non-Hispanic	Female	1	NSCLC	>ULN	3.7	3.4	n/a	n/a	positive	KRAS-G12V	2	PD					Y	42	42	4.43	4.96
P018	PD-1	66	White	Non-Hispanic	Male	1	NSCLC	>ULN	3.7	10.5714	19.2	Stable	negative	SMARCA4-D1467M; TP53-G154A; FBXW7-Loss; CDKN2A-loss; CDKN2B-loss	4	PD					Y	13	65	7.54	9.19
P019	PD-1	69	White	Non-Hispanic	Female	1	NSCLC	>ULN	4.2	4.25	7.9	Stable	positive	CTNNB1-S37F; PMS2-R325Q; EGFR-G779F; RAD51-P83R; CDKN2B9p21.3-loss; CDKN2A9p21.3-loss	1	PD*			Y	Y	Y	103	691	1	1.88
P020	PD-1	45	White	Non-Hispanic	Male	1	RCC	>ULN	4.3	3.88235	n/a	n/a	n/a	n/a	1	PR			Y		Y	248	245	23.51	16.3‡
P021	PD-1	73	White	Non-Hispanic	Male	1	NSCLC	>ULN	4.1	13.5	5.4	Stable	positive	SMARCA4-Q1104; TP53-G187_splice; ATM-N1937S; CDKN2A9p21.3-LOSS; CDKN2B9p21.3LOSS , PIK3R15q13.1-LOSS	3	PD					Y	93	77	5.65	6.81
P022	PD-1	57	White	Non-Hispanic	Male	1	NSCLC	>ULN	4.4	1.95833	15	Stable	positive	KRAS-G12V; TP53-R280fs*65; ATR-C2226F; KEL-R292Q; PARK2-R245M; SDHA-amp; CD79B-R95S; MAPK1-S939C; PAX5-A383P; SPEN-P3026del; ERBB4-S479R; MREIIA-V612L; PIK3C2G-K70N; TBX3-P648T; GABRA6-Q140H; GABRA6-R291L; P2RY8-R133P; RICTOR-amp; ZNF703-A401_H402insPTHLGGSSCSTCSA	2	PD*		Y	Y	Y	Y	165	413	6.54	5.12‡
* Subjects achieving SD or PR after initial PD
† Benefit is ongoing.
‡ Final measured tumor burden less than or close to starting measured tumor burden as some patients had progression by new lesions, non-target lesions, or withdrew consent without radiological progression.
§ PDL1 score is positive if ≥1% as noted on patient chart.

## Sheet: Table_S8
Dose-limiting toxicities (DLTs)
Nivo + pexmetinib
N=13
Pexmetinib dose, mg	200	400	600*	800^	Total
DLTs, n	-	3	-	2	5
AE type associated with DLT, n
Rash	-	1	-	2	3
Colitis	-	2	-	-	2
Ocular disorder	-	2	-	-	2
Anaphylaxis	-	-	-	1	1
Atrial fibrillation	-	-	-	1	1
*Persistent Grade 2 rash and Grade 3 colitis outside of the DLT window caused 600 to be deemed not an appropriate dose
^Multiple high-grade AEs were associated with each DLT event

## Sheet: Table_S9
Treatment Related AE Solid Tumor Arm N=15
Adverse_Event_Term_Category	Combined_Tox	Grade 1-2	Grade 3-5	ARRY_AE	BMS_AE
BLOOD AND LYMPHATIC SYSTEM DISORDERS	Anemia	7(47%)	2(13%)	0(0%)	0(0%)
	Eosinophilia	1(7%)	0(0%)	0(0%)	0(0%)
CARDIAC DISORDERS	Atrial fibrillation	0(0%)	1(7%)	0(0%)	0(0%)
	Cardiac disorders - Other, specifyElectrocardiogram QT corre	1(7%)	0(0%)	1(7%)	0(0%)
	Cardiac disorders - Other, specifyElectrocardiogram QT inter	1(7%)	0(0%)	1(7%)	0(0%)
	Cardiac disorders - Other, specifyQTC prolongation	1(7%)	0(0%)	1(7%)	0(0%)
	Cardiac disorders - Other, specifyQTC prolonged	1(7%)	0(0%)	1(7%)	0(0%)
	Cardiac disorders - Other, specifyQTc prolonged	0(0%)	1(7%)	0(0%)	0(0%)
	Cardiac disorders - Other, specifyTroponin 1 increased	1(7%)	0(0%)	0(0%)	0(0%)
	Chest pain - cardiac	1(7%)	0(0%)	0(0%)	0(0%)
	Myocardial infarction	0(0%)	1(7%)	0(0%)	0(0%)
	Palpitations	2(13%)	0(0%)	2(13%)	0(0%)
	Sinus bradycardia	1(7%)	0(0%)	0(0%)	0(0%)
	Sinus tachycardia	3(20%)	0(0%)	0(0%)	0(0%)
EYE DISORDERS	Blurred vision	3(20%)	0(0%)	3(20%)	0(0%)
	Eye disorders - Other, specifyVision Decreased - Right Eye	1(7%)	0(0%)	0(0%)	0(0%)
	Uvetis	1(7%)	0(0%)	1(7%)	1(7%)
GASTROINTESTINAL DISORDERS	Colitis	0(0%)	2(13%)	1(7%)	2(13%)
	Constipation	5(33%)	0(0%)	0(0%)	0(0%)
	Diarrhea	5(33%)	1(7%)	3(20%)	3(20%)
	Dyspepsia	2(13%)	0(0%)	1(7%)	0(0%)
	Dysphagia	1(7%)	0(0%)	0(0%)	0(0%)
	Gastric hemorrhage	0(0%)	1(7%)	0(0%)	0(0%)
	Gastritis	1(7%)	0(0%)	1(7%)	1(7%)
	Gastroesophageal reflux disease	1(7%)	0(0%)	1(7%)	1(7%)
	Gastrointestinal disorders - Other, specifyAbdominal cramps	1(7%)	0(0%)	0(0%)	0(0%)
	Gastrointestinal disorders - Other, specifyEpigastric pain	1(7%)	0(0%)	1(7%)	1(7%)
	Gastrointestinal disorders - Other, specifyGI Bleed	0(0%)	1(7%)	0(0%)	0(0%)
	Gastrointestinal disorders - Other, specifyImmune mediated c	0(0%)	1(7%)	1(7%)	1(7%)
	Gastrointestinal disorders - Other, specifyOral Mucositis	1(7%)	0(0%)	0(0%)	0(0%)
	Gastrointestinal disorders - Other, specifyrectal bleeding	0(0%)	1(7%)	1(7%)	1(7%)
	Gastrointestinal pain	1(7%)	0(0%)	1(7%)	1(7%)
	Mucositis oral	1(7%)	0(0%)	1(7%)	1(7%)
	Nausea	4(27%)	2(13%)	2(13%)	2(13%)
	Rectal hemorrhage	1(7%)	0(0%)	0(0%)	0(0%)
	Vomiting	1(7%)	1(7%)	2(13%)	2(13%)
GENERAL DISORDERS AND ADMINISTRATION SITE CONDITIONS	Chills	1(7%)	0(0%)	0(0%)	0(0%)
	Edema face	0(0%)	1(7%)	0(0%)	0(0%)
	Edema limbs	2(13%)	0(0%)	0(0%)	0(0%)
	Fatigue	5(33%)	0(0%)	3(20%)	2(13%)
	Fever	4(27%)	0(0%)	1(7%)	1(7%)
	Flu like symptoms	1(7%)	0(0%)	0(0%)	0(0%)
	Localized edema	1(7%)	0(0%)	0(0%)	0(0%)
	Neck edema	1(7%)	0(0%)	0(0%)	0(0%)
IMMUNE SYSTEM DISORDERS	Anaphylaxis	0(0%)	1(7%)	0(0%)	0(0%)
	Immune system disorders - Other, specifyImmune mediated coli	0(0%)	1(7%)	0(0%)	1(7%)
INFECTIONS AND INFESTATIONS	Infections and infestations - Other, specifyAspiration pneum	0(0%)	1(7%)	0(0%)	0(0%)
	Infections and infestations - Other, specifySinus infection	1(7%)	0(0%)	0(0%)	0(0%)
	Infections and infestations - Other, specifyear infection	1(7%)	0(0%)	0(0%)	0(0%)
	Lung infection	0(0%)	1(7%)	0(0%)	0(0%)
	Otitis externa	1(7%)	0(0%)	0(0%)	0(0%)
	Thrush	1(7%)	0(0%)	0(0%)	0(0%)
INVESTIGATIONS	Alanine aminotransferase increased	4(27%)	1(7%)	3(20%)	3(20%)
	Alkaline phosphatase increased	4(27%)	0(0%)	1(7%)	1(7%)
	Aspartate aminotransferase increased	6(40%)	0(0%)	3(20%)	3(20%)
	Blood bicarbonate decreased	1(7%)	0(0%)	0(0%)	0(0%)
	Blood bilirubin increased	2(13%)	0(0%)	0(0%)	0(0%)
	Blood lactate dehydrogenase increased	5(33%)	0(0%)	0(0%)	0(0%)
	Creatinine increased	3(20%)	0(0%)	0(0%)	0(0%)
	Electrocardiogram QT corrected interval prolonged	1(7%)	0(0%)	1(7%)	0(0%)
	Fibrinogen decreased	1(7%)	0(0%)	0(0%)	0(0%)
	INR increased	1(7%)	0(0%)	0(0%)	0(0%)
	Investigations - Other, specifyElevated WBC	1(7%)	0(0%)	0(0%)	0(0%)
	Investigations - Other, specifyProtein decreased	1(7%)	0(0%)	0(0%)	0(0%)
	Investigations - Other, specifyTotal bilirubin increase	1(7%)	0(0%)	0(0%)	0(0%)
	Investigations - Other, specifyWBC increase	1(7%)	0(0%)	0(0%)	0(0%)
	Investigations - Other, specifydecreased ALC	1(7%)	0(0%)	0(0%)	0(0%)
	Investigations - Other, specifyeye redness	1(7%)	0(0%)	1(7%)	0(0%)
	Investigations - Other, specifyeye redness/irritation	1(7%)	0(0%)	1(7%)	0(0%)
	Investigations - Other, specifyleg spasm	1(7%)	0(0%)	0(0%)	0(0%)
	Investigations - Other, specifyneck spasm	1(7%)	0(0%)	0(0%)	0(0%)
	Lymphocyte count decreased	3(20%)	1(7%)	0(0%)	0(0%)
	Lymphocyte count increased	4(27%)	2(13%)	0(0%)	0(0%)
	Neutrophil count decreased	2(13%)	0(0%)	0(0%)	0(0%)
	Platelet count decreased	4(27%)	0(0%)	0(0%)	0(0%)
	Thyroid stimulating hormone increased	1(7%)	0(0%)	0(0%)	1(7%)
	Weight loss	2(13%)	0(0%)	1(7%)	0(0%)
	White blood cell decreased	2(13%)	0(0%)	0(0%)	0(0%)
METABOLISM AND NUTRITION DISORDERS	Acidosis	1(7%)	0(0%)	0(0%)	0(0%)
	Anorexia	3(20%)	0(0%)	0(0%)	0(0%)
	Hypercalcemia	2(13%)	0(0%)	0(0%)	0(0%)
	Hyperglycemia	2(13%)	0(0%)	0(0%)	0(0%)
	Hyperkalemia	3(20%)	0(0%)	0(0%)	0(0%)
	Hypermagnesemia	2(13%)	0(0%)	0(0%)	0(0%)
	Hyperuricemia	5(33%)	0(0%)	0(0%)	0(0%)
	Hypoalbuminemia	10(67%)	0(0%)	0(0%)	0(0%)
	Hypocalcemia	9(60%)	0(0%)	0(0%)	0(0%)
	Hypokalemia	3(20%)	1(7%)	0(0%)	0(0%)
	Hypomagnesemia	2(13%)	0(0%)	0(0%)	0(0%)
	Hyponatremia	10(67%)	0(0%)	0(0%)	0(0%)
	Hypophosphatemia	4(27%)	0(0%)	0(0%)	0(0%)
MUSCULOSKELETAL AND CONNECTIVE TISSUE DISORDERS	Back pain	3(20%)	1(7%)	0(0%)	0(0%)
	Muscle cramp	3(20%)	0(0%)	2(13%)	0(0%)
	Musculoskeletal and connective tissue disorder - Other, spec	2(13%)	0(0%)	0(0%)	0(0%)
	Myalgia	2(13%)	0(0%)	1(7%)	2(13%)
NERVOUS SYSTEM DISORDERS	Ataxia	1(7%)	0(0%)	0(0%)	0(0%)
	Dizziness	2(13%)	0(0%)	1(7%)	1(7%)
	Dysgeusia	1(7%)	0(0%)	1(7%)	0(0%)
	Headache	2(13%)	0(0%)	0(0%)	0(0%)
	Nervous system disorders - Other, specifyTremor hands and fe	1(7%)	0(0%)	0(0%)	0(0%)
	Nervous system disorders - Other, specifyfinger neuropathy	1(7%)	0(0%)	0(0%)	0(0%)
	Nervous system disorders - Other, specifyhand tremor	2(13%)	0(0%)	2(13%)	0(0%)
PSYCHIATRIC DISORDERS	Psychiatric disorders - Other, specifysleep disorder	1(7%)	0(0%)	0(0%)	0(0%)
RENAL AND URINARY DISORDERS	Proteinuria	1(7%)	0(0%)	0(0%)	0(0%)
	Urinary retention	1(7%)	0(0%)	0(0%)	0(0%)
REPRODUCTIVE SYSTEM AND BREAST DISORDERS	Gynecomastia	1(7%)	0(0%)	0(0%)	0(0%)
RESPIRATORY, THORACIC AND MEDIASTINAL DISORDERS	Adult respiratory distress syndrome	0(0%)	1(7%)	0(0%)	0(0%)
	Aspiration	0(0%)	2(13%)	0(0%)	0(0%)
	Bronchospasm	1(7%)	0(0%)	0(0%)	0(0%)
	Cough	3(20%)	0(0%)	0(0%)	0(0%)
	Dyspnea	2(13%)	0(0%)	0(0%)	0(0%)
	Hoarseness	0(0%)	1(7%)	0(0%)	0(0%)
	Hypoxia	1(7%)	1(7%)	0(0%)	0(0%)
	Nasal congestion	2(13%)	0(0%)	0(0%)	0(0%)
	Productive cough	1(7%)	0(0%)	0(0%)	0(0%)
	Respiratory, thoracic and mediastinal disorders - Other, spe	0(0%)	1(7%)	1(7%)	1(7%)
	Sore throat	1(7%)	0(0%)	0(0%)	0(0%)
SKIN AND SUBCUTANEOUS TISSUE DISORDERS	Dry skin	3(20%)	0(0%)	2(13%)	2(13%)
	Pruritus	3(20%)	0(0%)	2(13%)	3(20%)
	Rash maculo-papular	6(40%)	3(20%)	4(27%)	9(60%)
	Skin and subcutaneous tissue disorders - Other, specifyBullo	0(0%)	1(7%)	1(7%)	1(7%)
	Skin and subcutaneous tissue disorders - Other, specifyrash	1(7%)	0(0%)	0(0%)	0(0%)
VASCULAR DISORDERS	Flushing	1(7%)	0(0%)	0(0%)	0(0%)
	Hypertension	1(7%)	1(7%)	0(0%)	0(0%)
	Hypotension	2(13%)	2(13%)	0(0%)	0(0%)
	Thromboembolic event	1(7%)	0(0%)	0(0%)	0(0%)
	Vascular disorders - Other, specifyOrthostatic hypotension	1(7%)	0(0%)	0(0%)	0(0%)
	Vascular disorders - Other, specifyThrombocytopenia	1(7%)	0(0%)	0(0%)	0(0%)

[truncated: 2 more sheets: Table_S10, Table_S11]
